# Supplementary material for: A biofeedback-enhanced therapeutic exercise video game intervention for young people with cerebral palsy: A randomized single-case experimental design feasibility study
Source: PubMed Central journal article supplement (PMC7307764; doi:10.1371/journal.pone.0234767), 2020-06-22
Supplement: pone.0234767.s007.pdf [file pone.0234767.s007.pdf]

# Active Wrist Extension (Open)

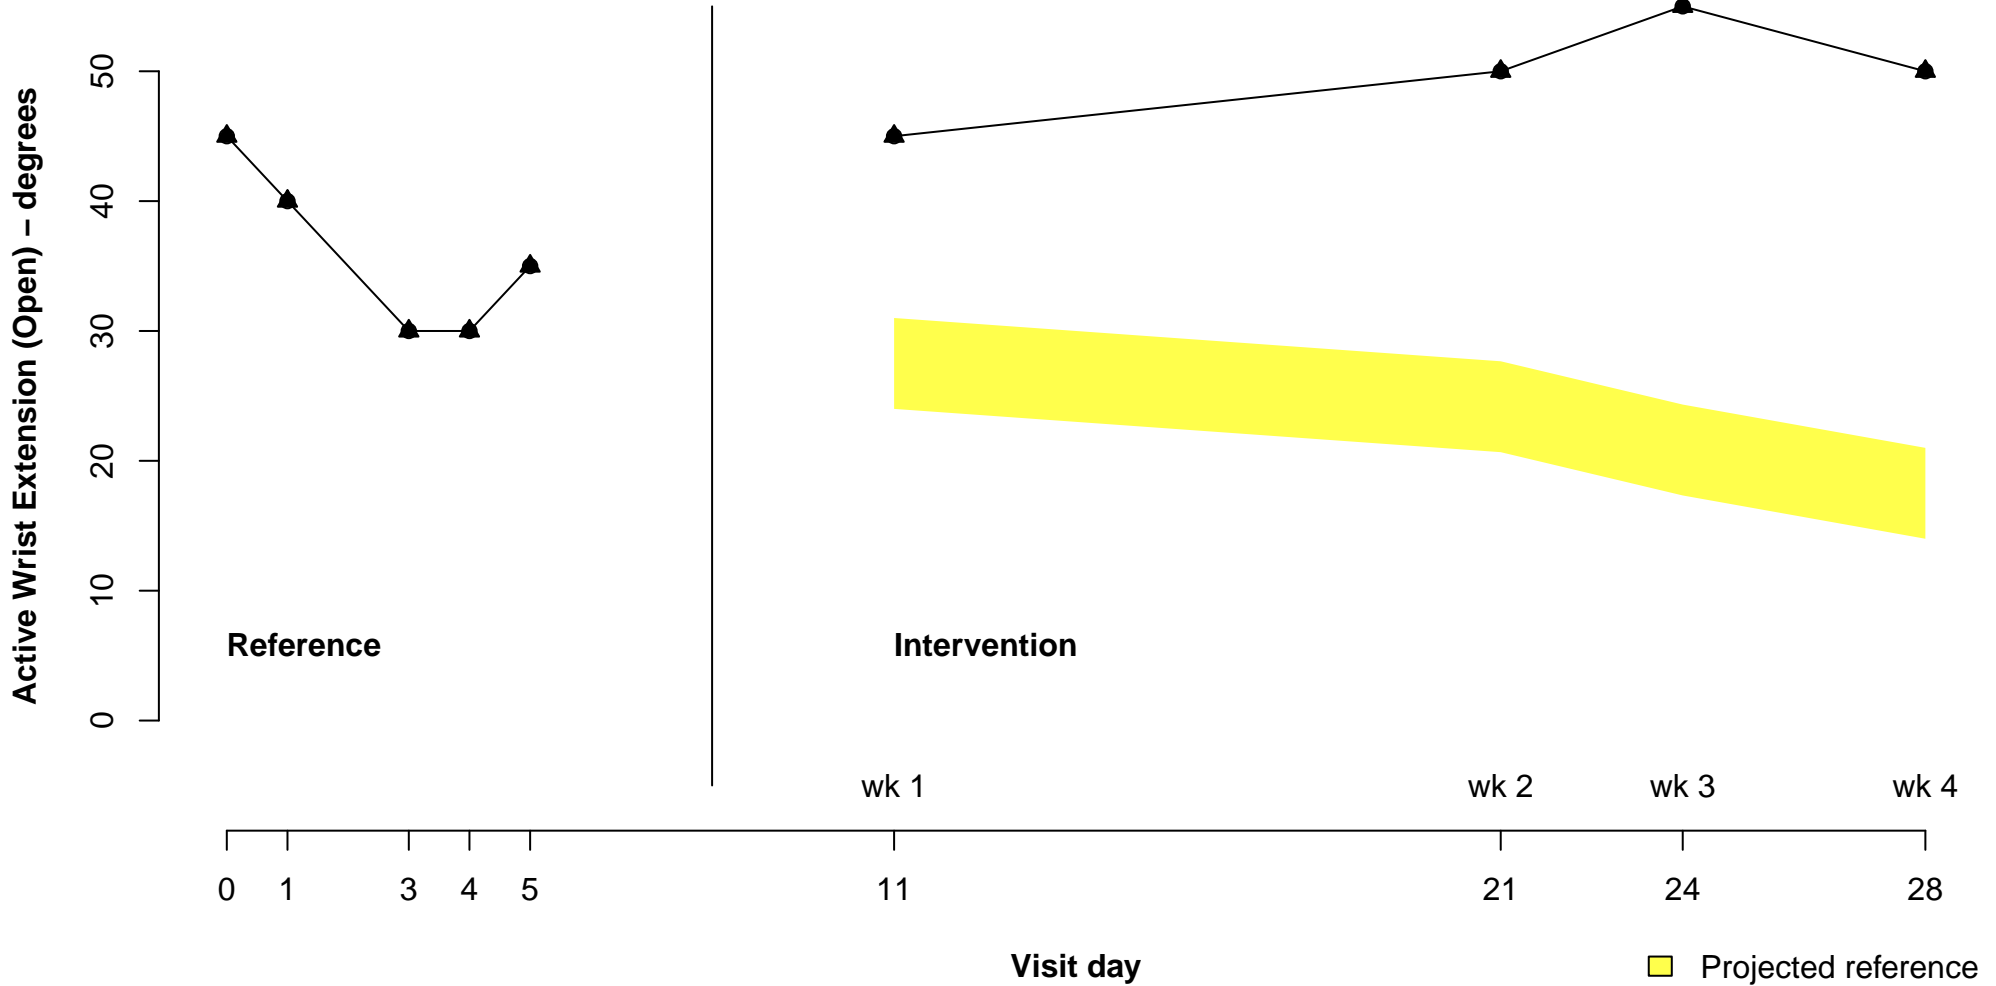

A  
Reference phase trend: minimal (-2 deg/visit)  
Reference phase stability: stable (80% in envelope)  
Level change estimate: large  
Intervention phase 19 deg higher than Reference phase  
Average of 4 degree increase across Intervention visits  
0% overlap between phases (PAND)

■ Projected reference

## Active Wrist Extension (Open)

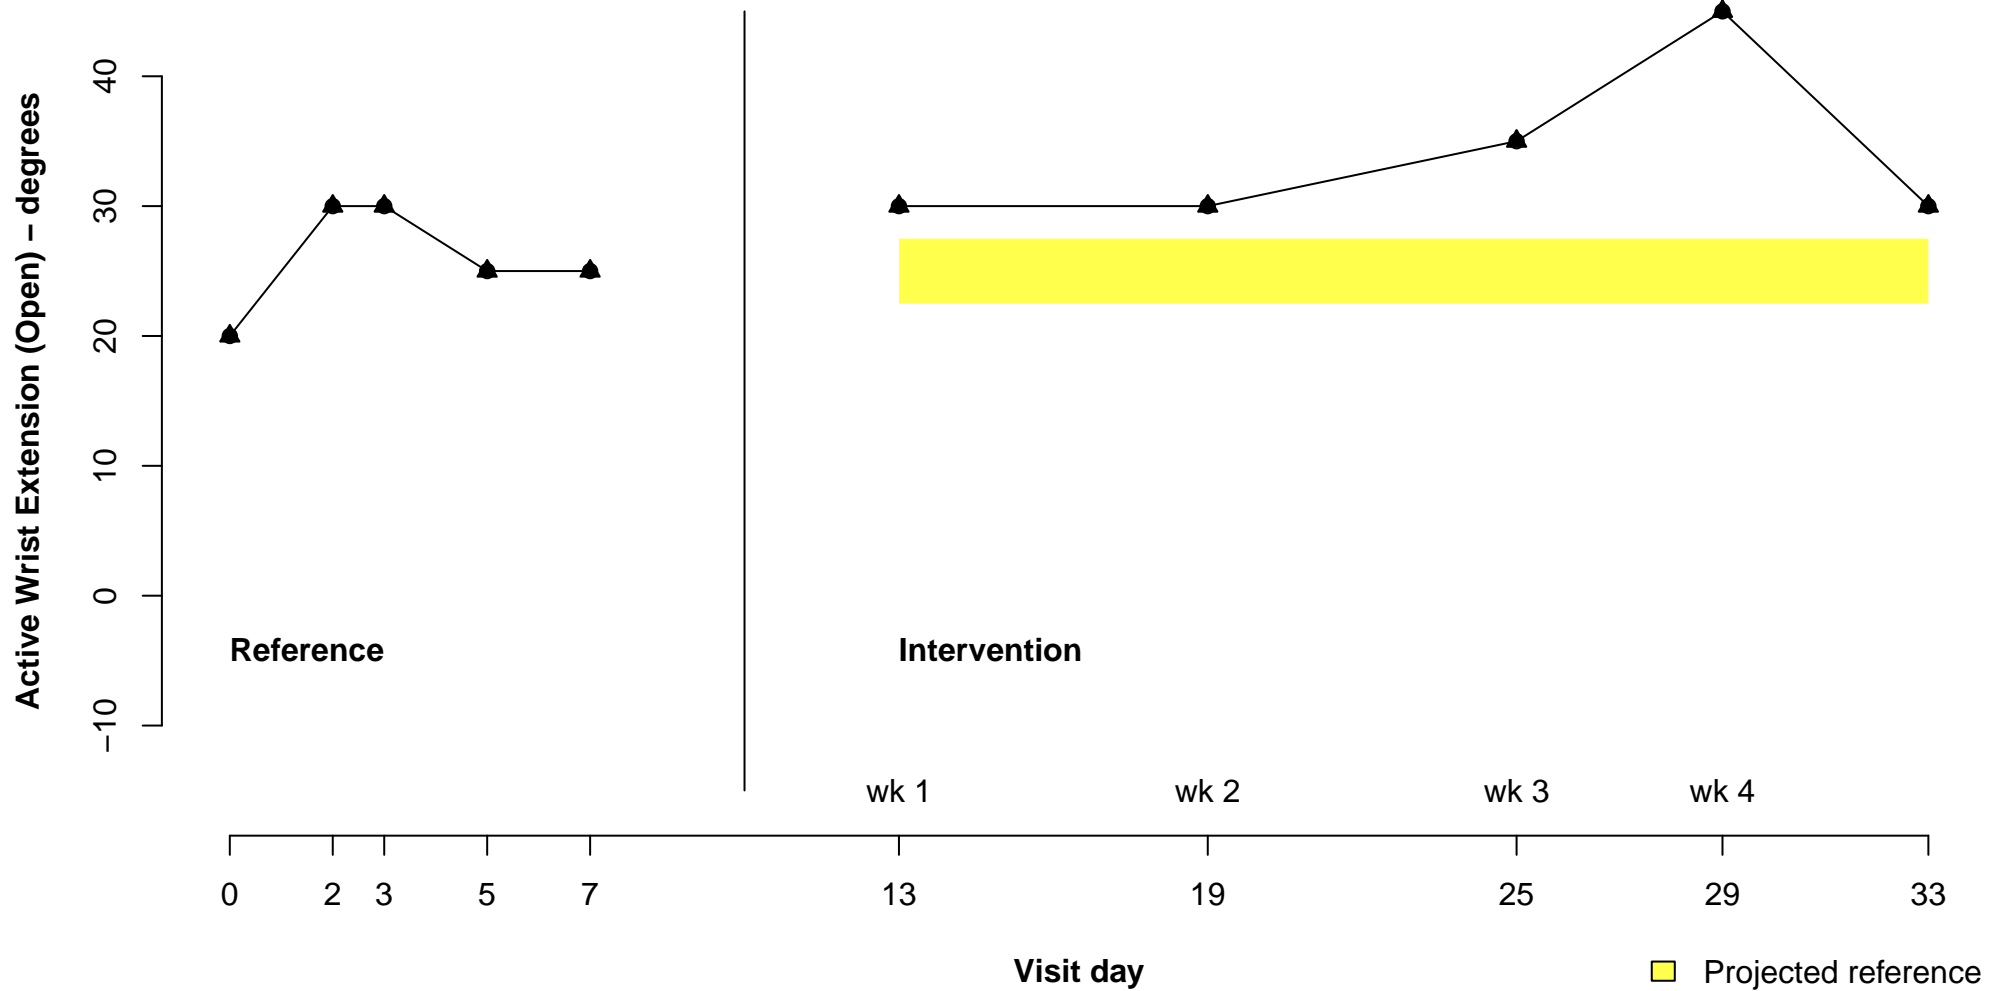

B

Reference phase trend: minimal (1 deg/visit)

Reference phase stability: stable (100% in envelope)

Level change estimate: minimal

Intervention phase 4 deg higher than Reference phase

Average of -1 degree decrease across Intervention visits

30% overlap between phases (PAND)

### Active Wrist Extension (Open)

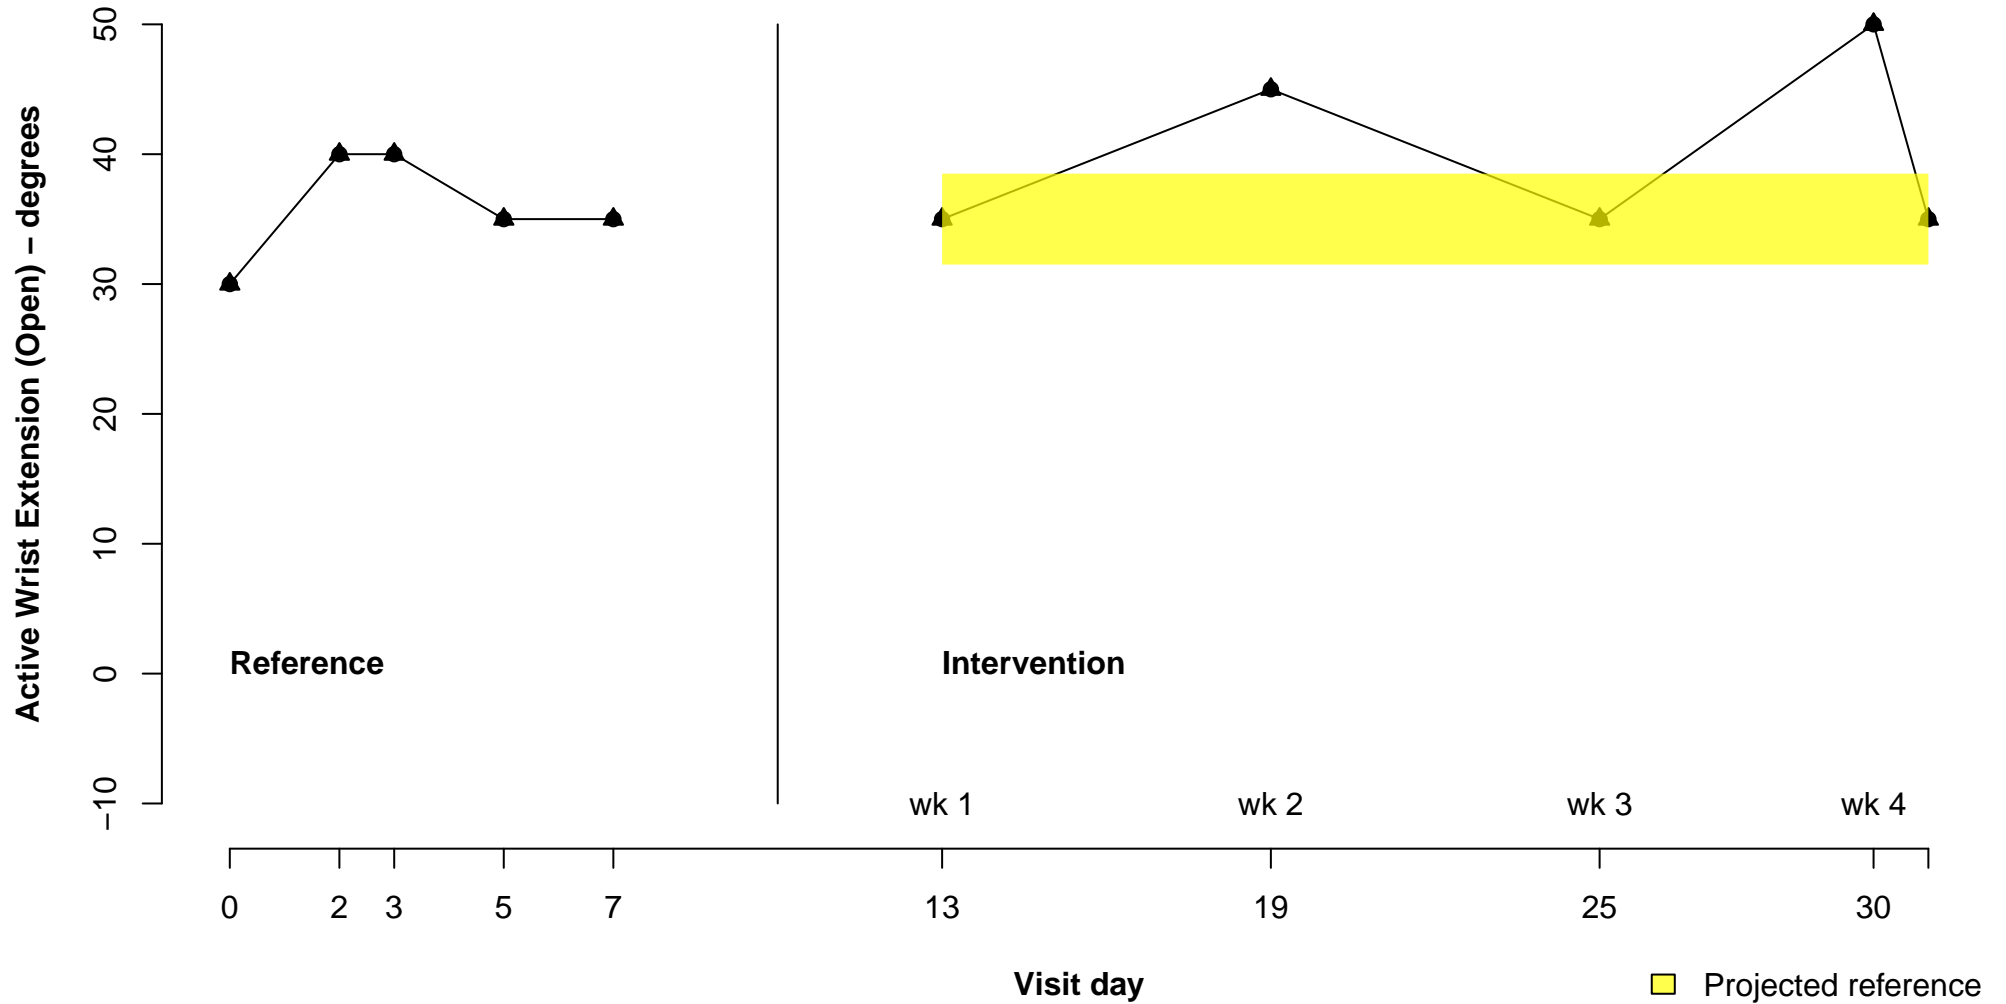

C

Reference phase trend: minimal (1 deg/visit)

Reference phase stability: stable (100% in envelope)

Level change estimate: minimal

Intervention phase 0 deg higher than Reference phase

Average of -1 degree decrease across Intervention visits

40% overlap between phases (PAND)

## Active Wrist Extension (Open)

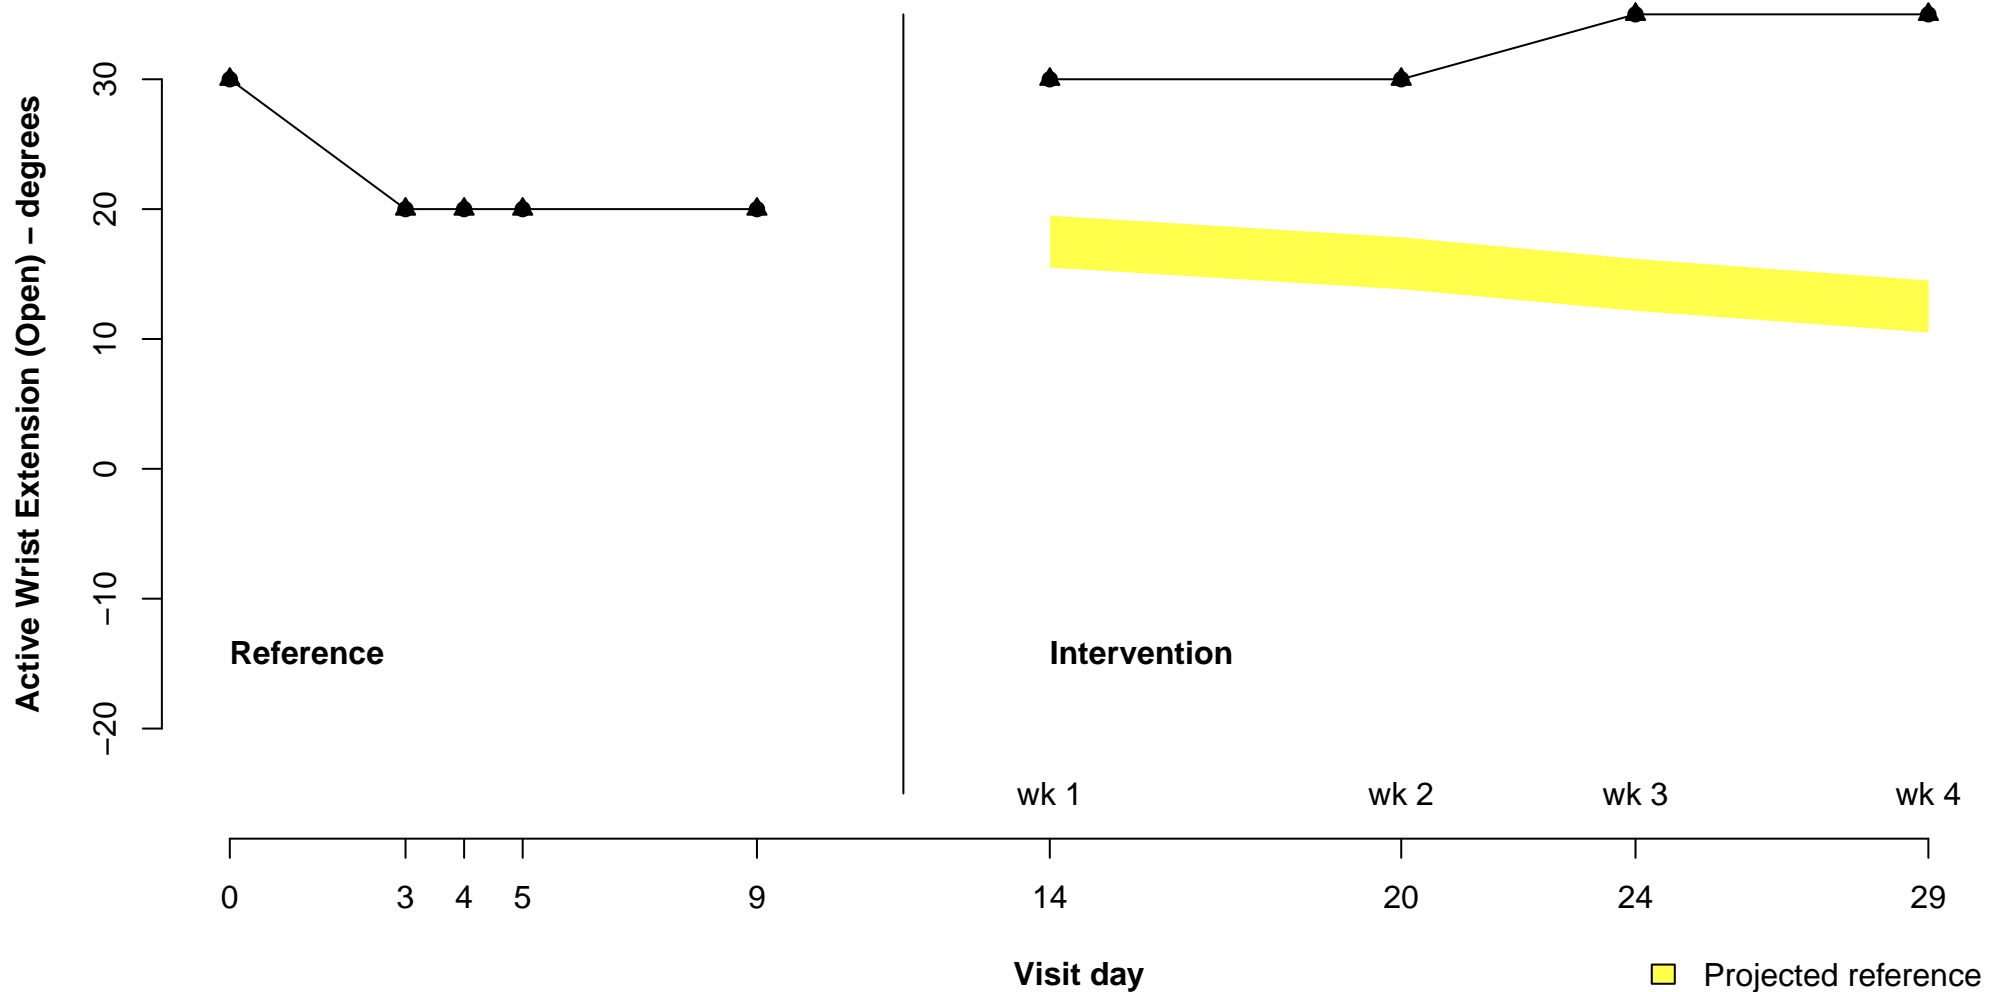

D

Reference phase trend: minimal (-2 deg/visit)

Reference phase stability: highly variable (0% in envelope)

Level change estimate: large

Intervention phase 16 deg higher than Reference phase

Average of 4 degree increase across Intervention visits

0% overlap between phases (PAND)

# Active Wrist Extension (Open)

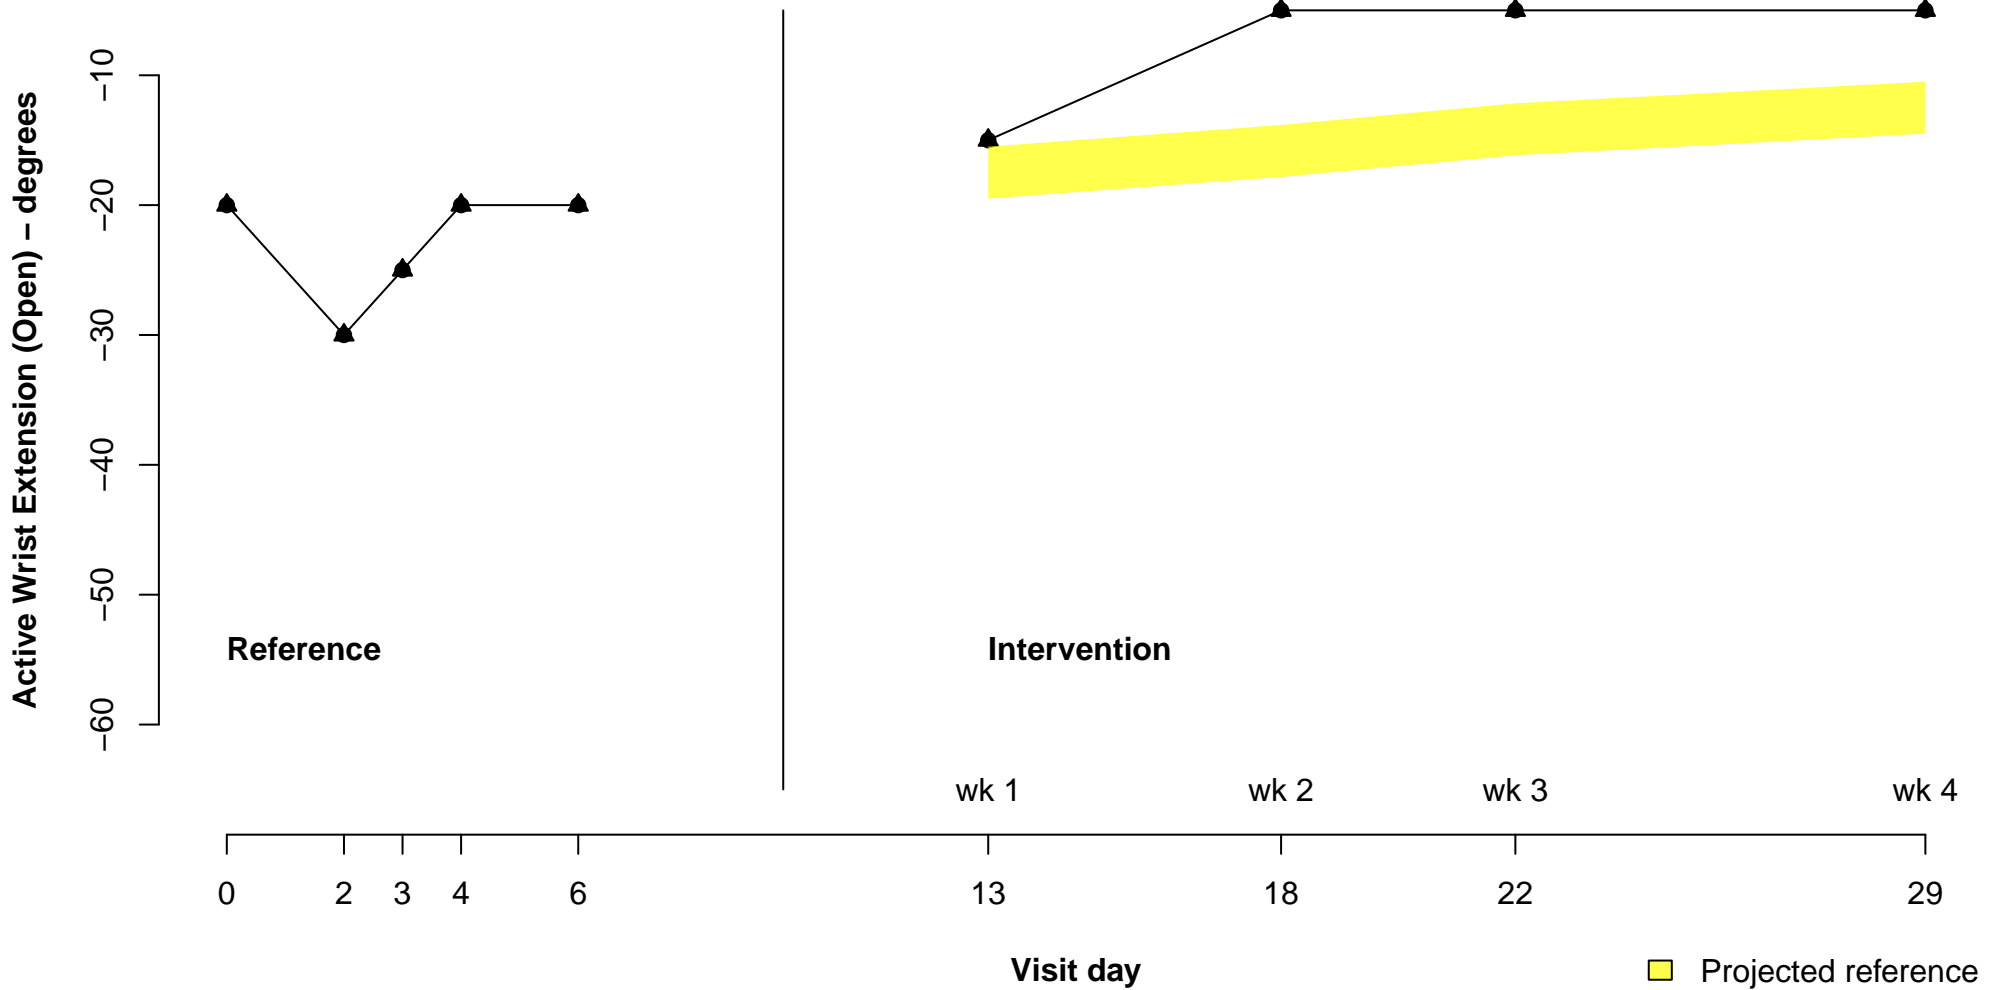

F  
Reference phase trend: minimal (0 deg/visit)  
Reference phase stability: somewhat variable (60% in envelope)  
Level change estimate: moderate  
Intervention phase 10 deg higher than Reference phase  
Average of 3 degree increase across Intervention visits  
0% overlap between phases (PAND)

# Active Wrist Extension (Open)

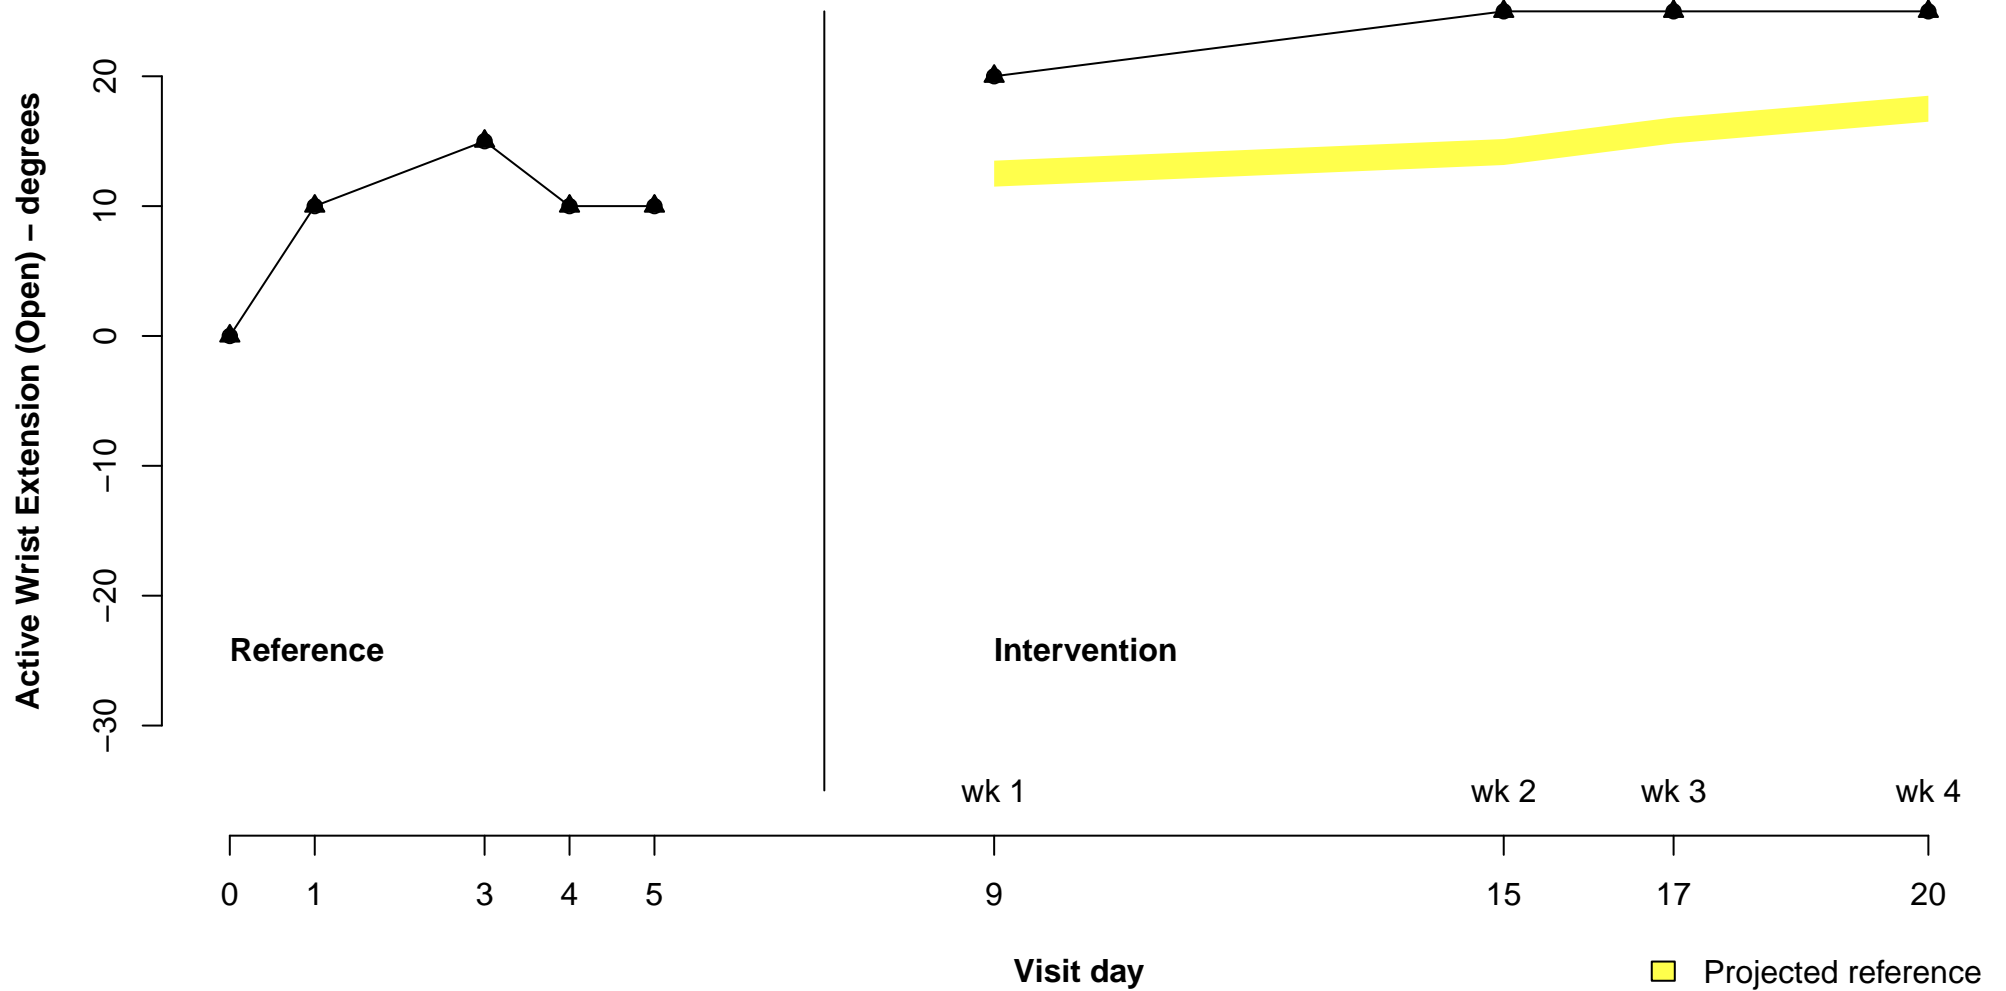

F  
Reference phase trend: minimal (2 deg/visit)  
Reference phase stability: highly variable (0% in envelope)  
Level change estimate: minimal  
Intervention phase 5 deg higher than Reference phase  
Average of -1 degree decrease across Intervention visits  
22% overlap between phases (PAND)

■ Projected reference

# Active Wrist Extension (Open)

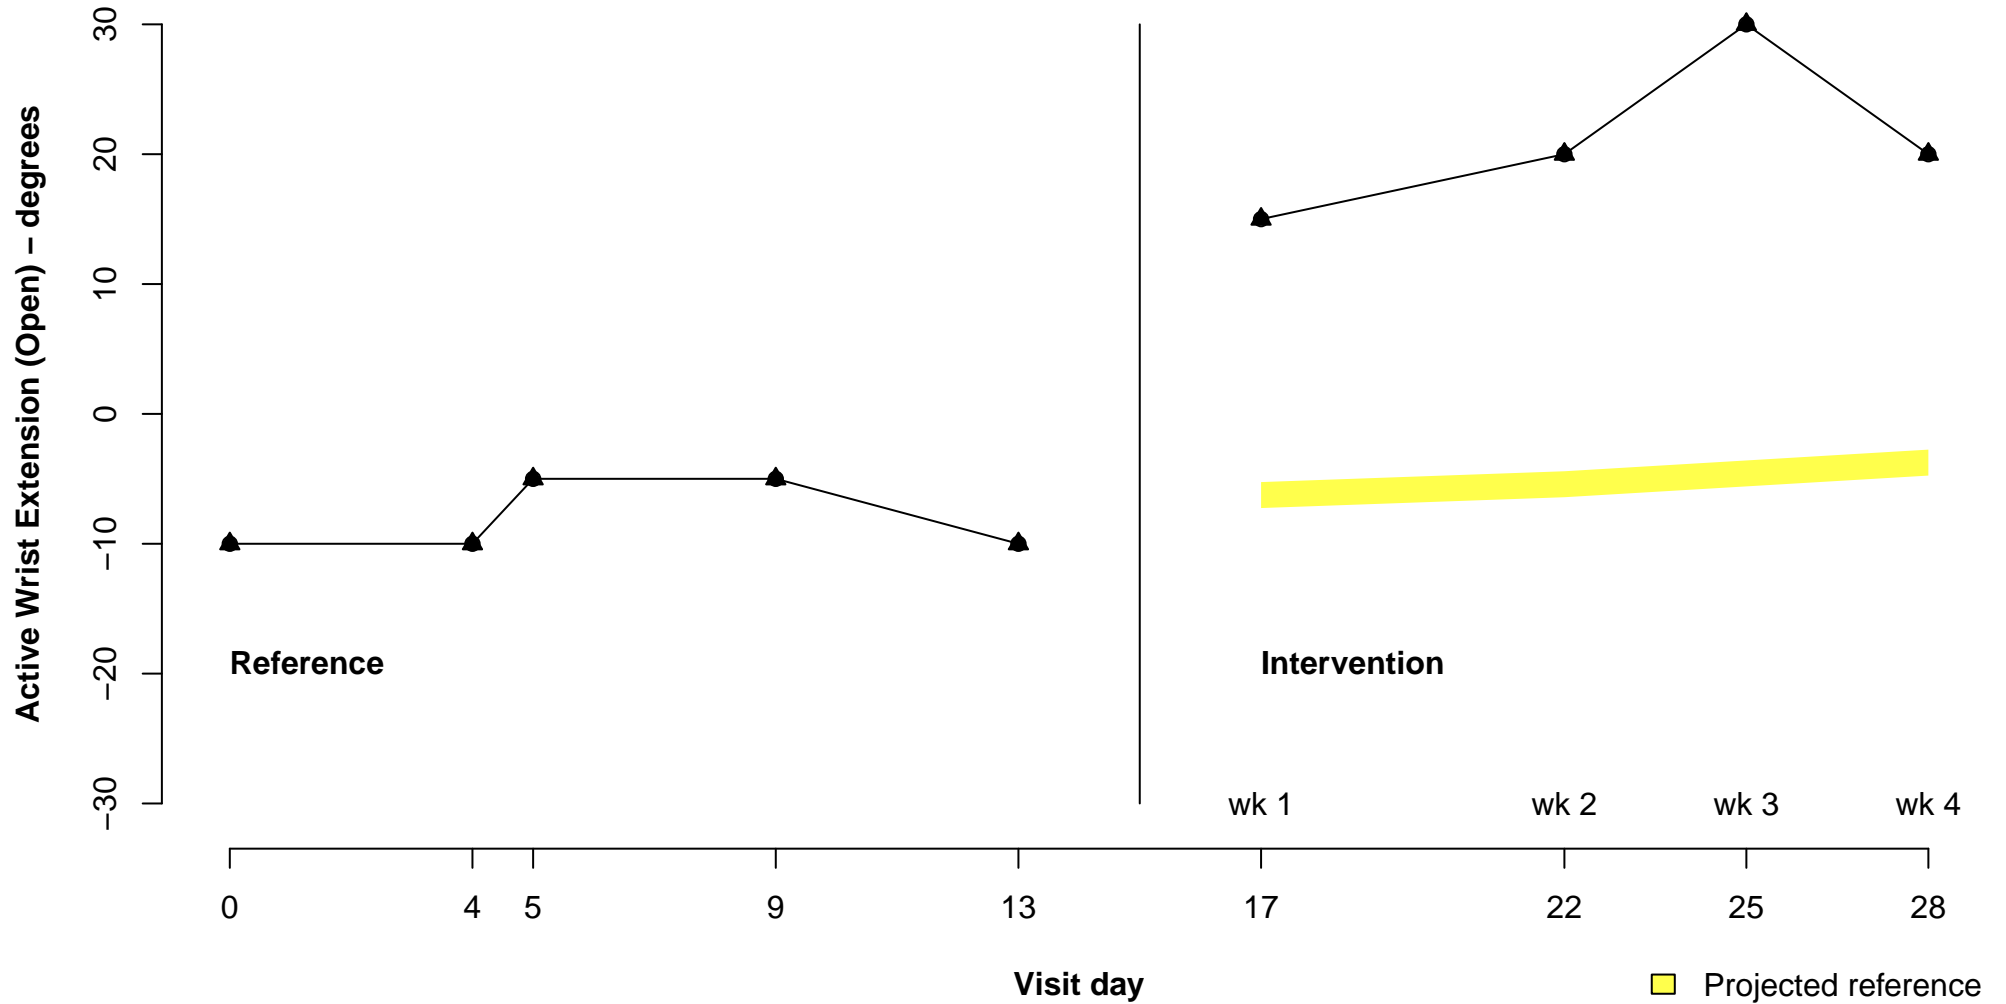

G

Reference phase trend: minimal (0 deg/visit)  
Reference phase stability: stable (100% in envelope)  
Level change estimate: large  
Intervention phase 27 deg higher than Reference phase  
Average of 2 degree increase across Intervention visits  
0% overlap between phases (PAND)

# Active Wrist Extension (Open)

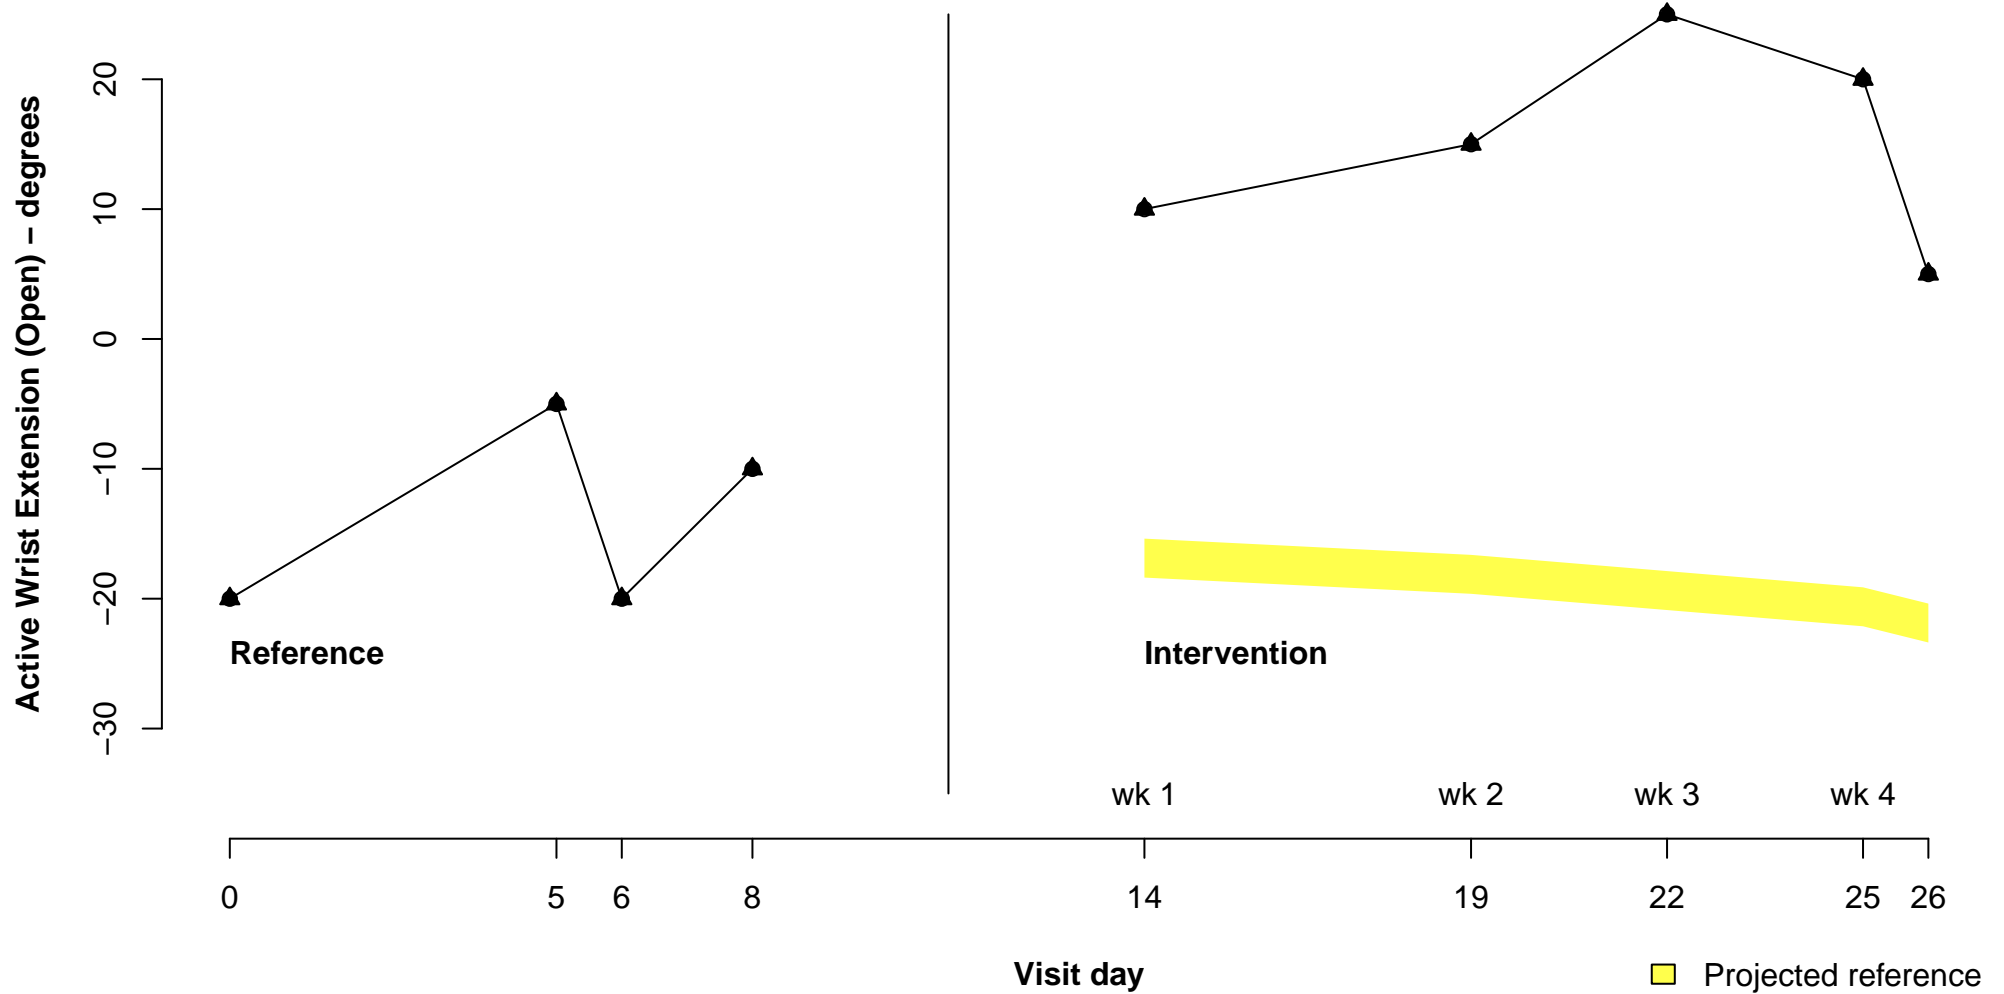

H

Reference phase trend: minimal (3 deg/visit)

Reference phase stability: stable (100% in envelope)

Level change estimate: large

Intervention phase 23 deg higher than Reference phase

Average of -5 degree decrease across Intervention visits

11% overlap between phases (PAND)



# Active Wrist Extension (Open)

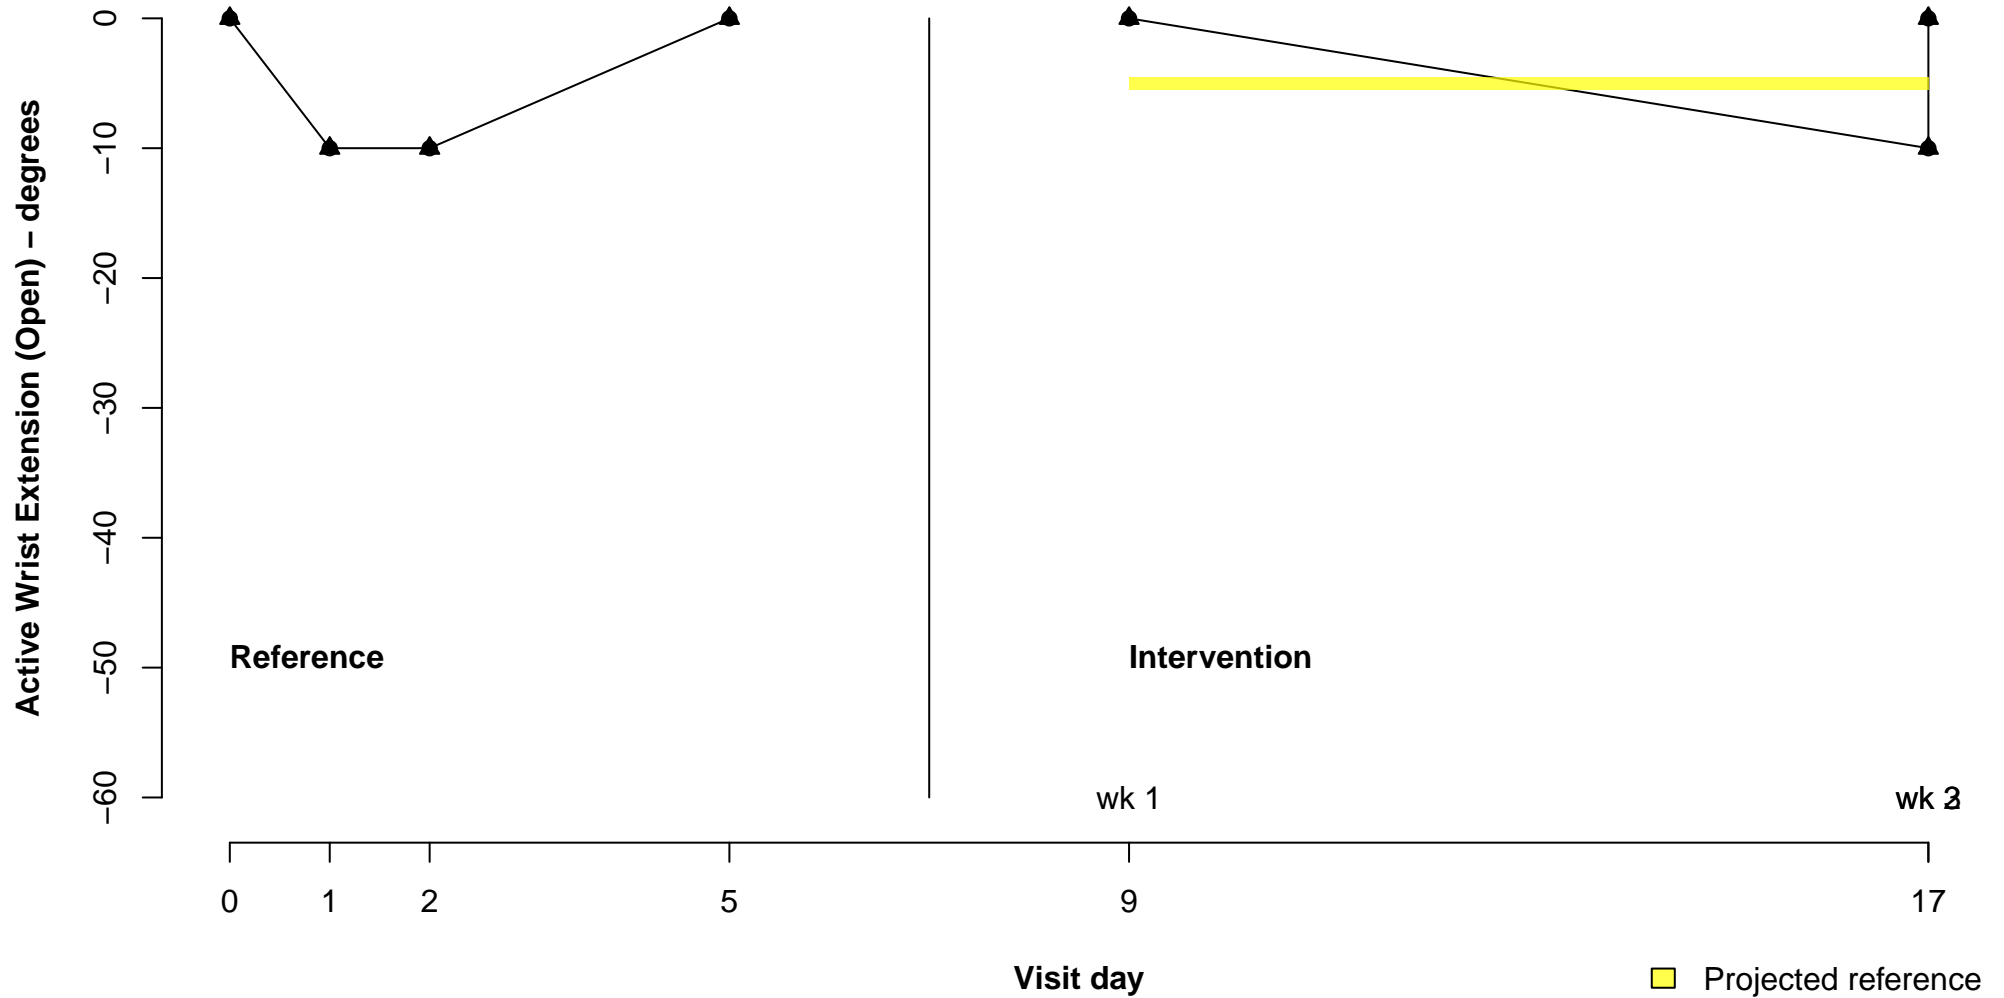

Reference phase trend: minimal (0 deg/visit)  
Reference phase stability: stable (100% in envelope)  
Level change estimate: minimal  
Intervention phase 2 deg higher than Reference phase  
Average of 0 degree increase across Intervention visits  
43% overlap between phases (PAND)

# Active Wrist Extension (Open)

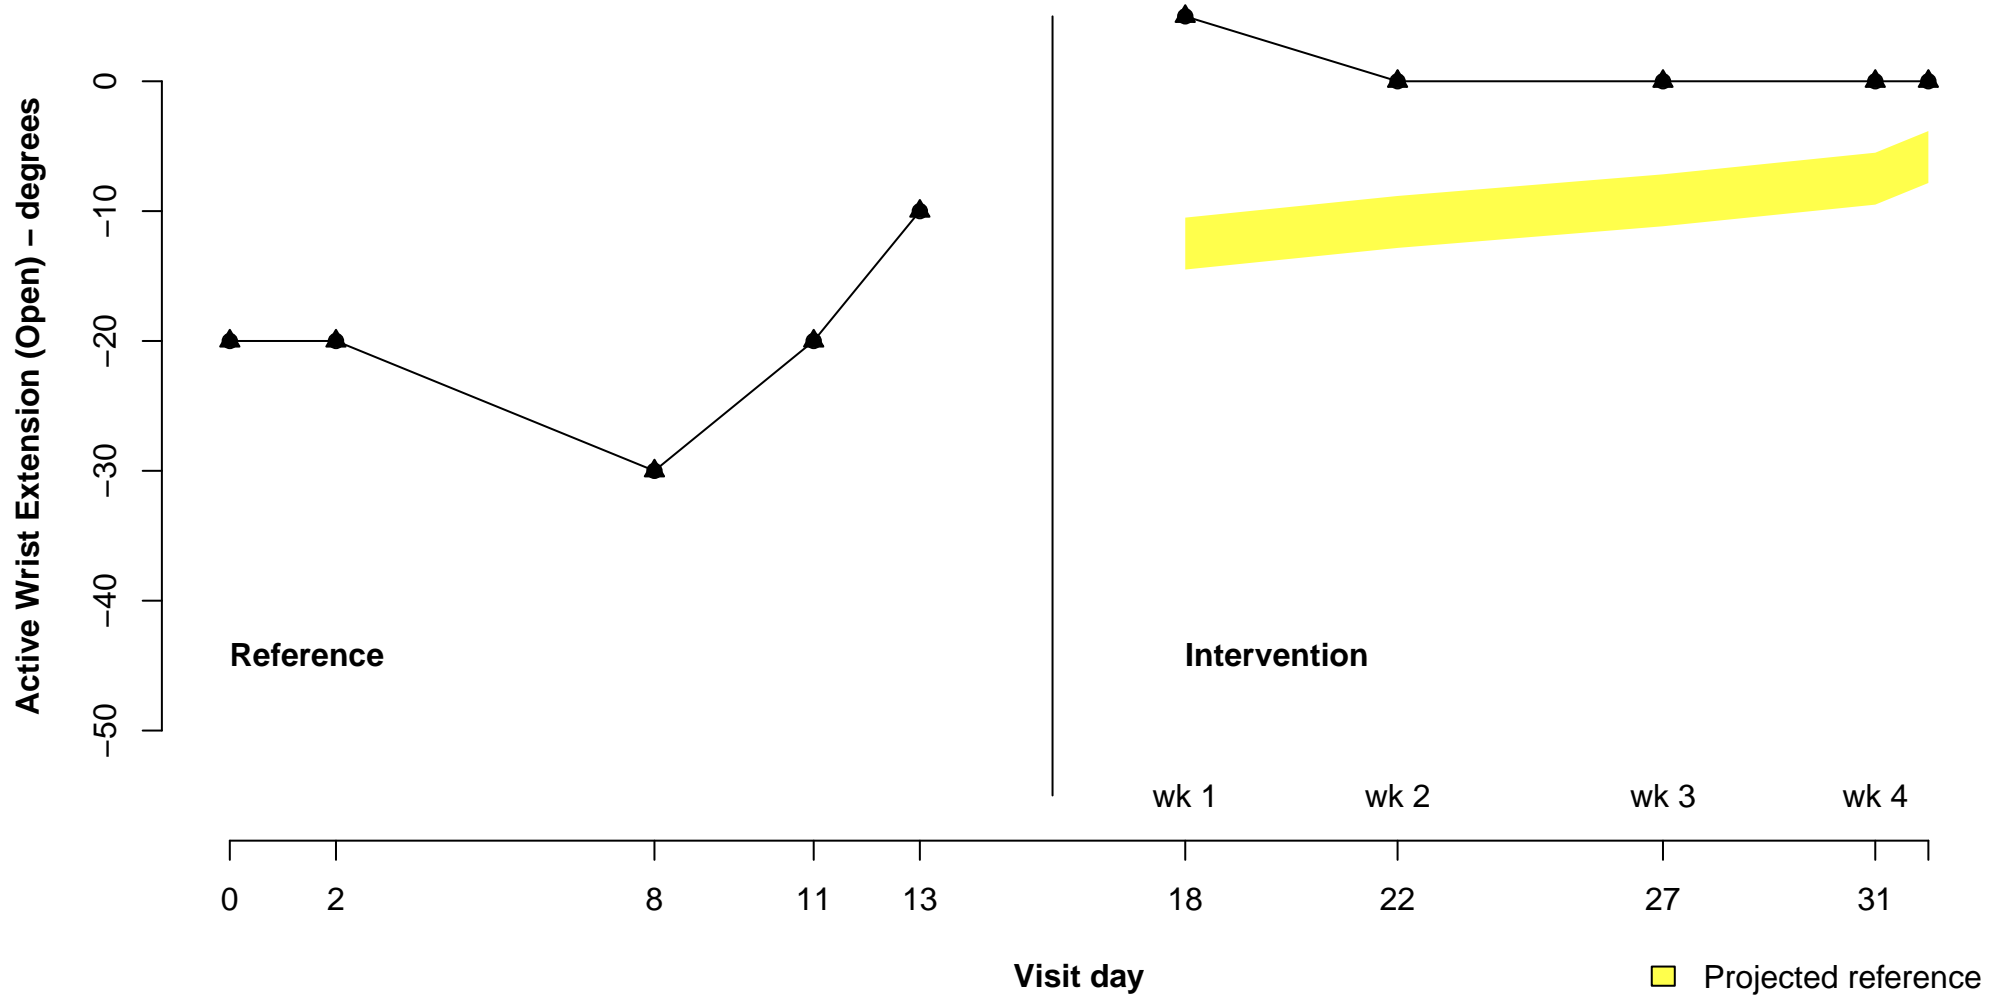

J  
Reference phase trend: minimal (2 deg/visit)  
Reference phase stability: highly variable (0% in envelope)  
Level change estimate: large  
Intervention phase 16 deg higher than Reference phase  
Average of -4 degree decrease across Intervention visits  
20% overlap between phases (PAND)

# Active Wrist Extension (Open)

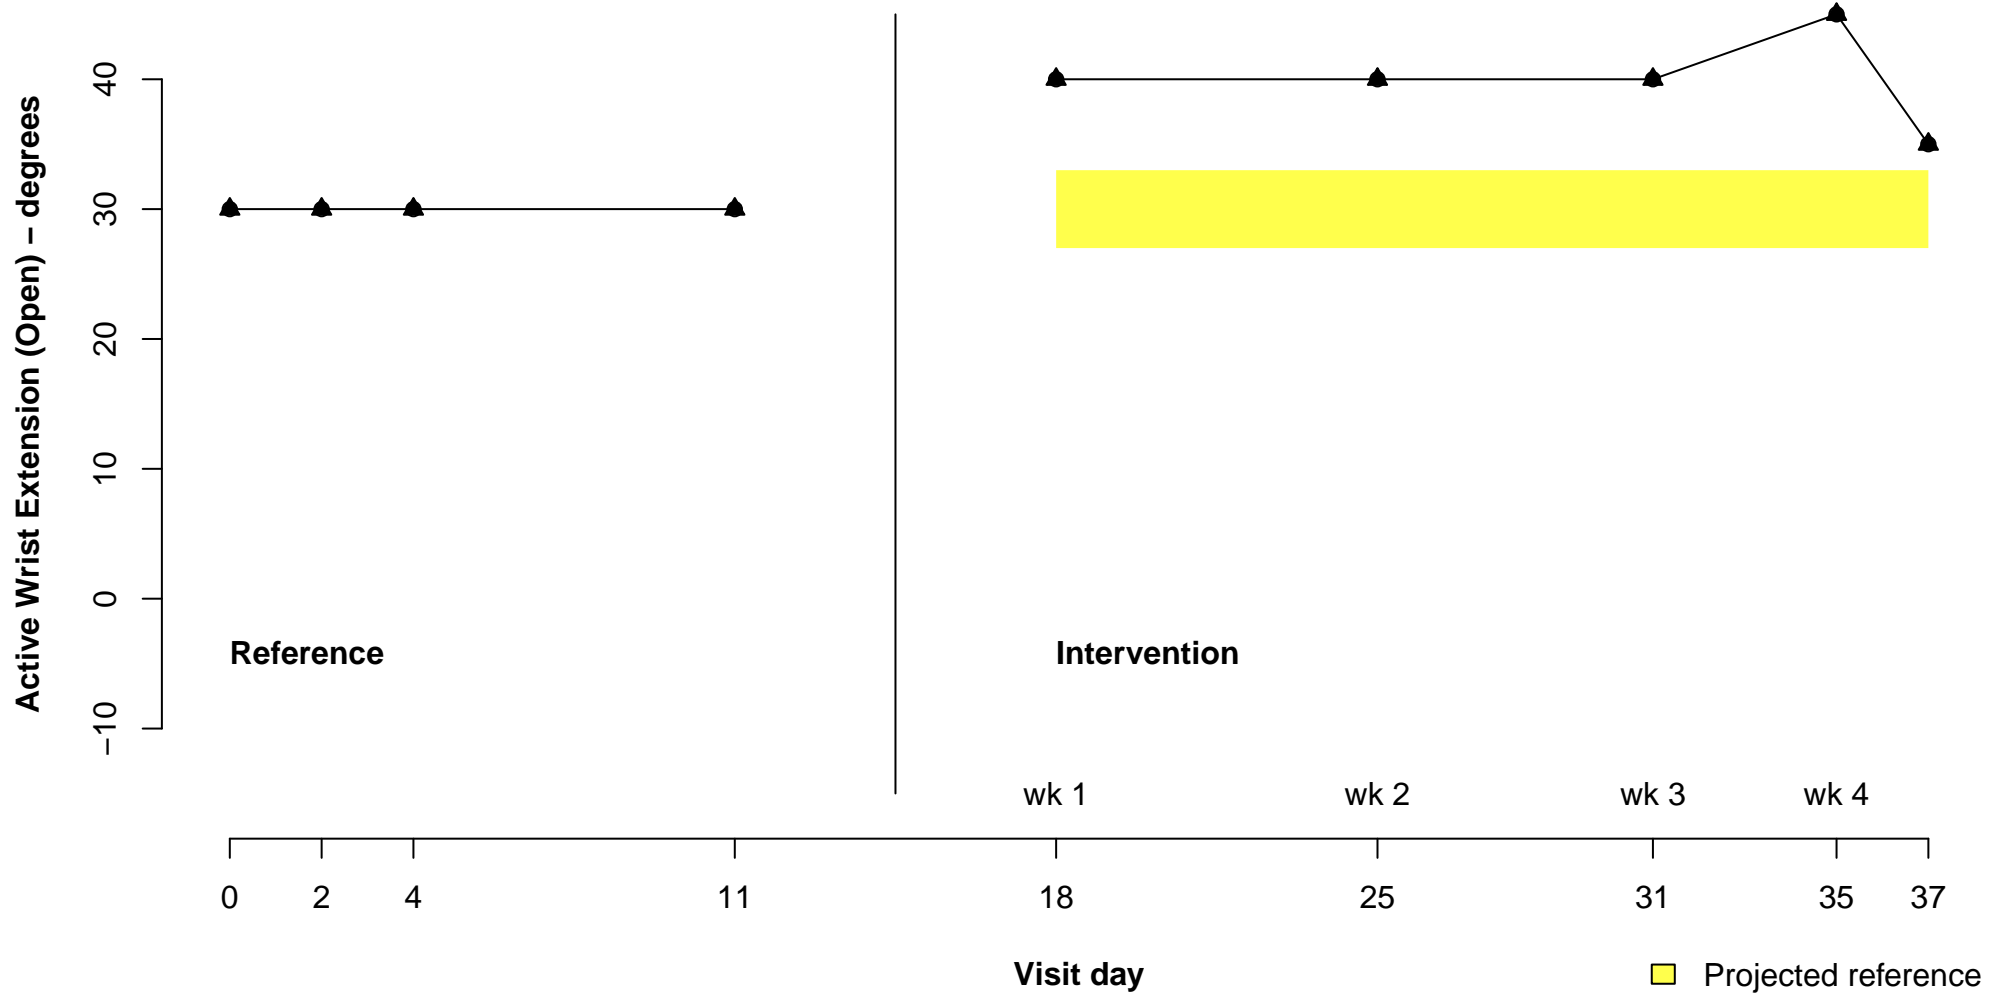

K

Reference phase trend: minimal (0 deg/visit)

Reference phase stability: stable (100% in envelope)

Level change estimate: moderate

Intervention phase 12 deg higher than Reference phase

Average of -1 degree decrease across Intervention visits

0% overlap between phases (PAND)

## Active Wrist Extension (Open)

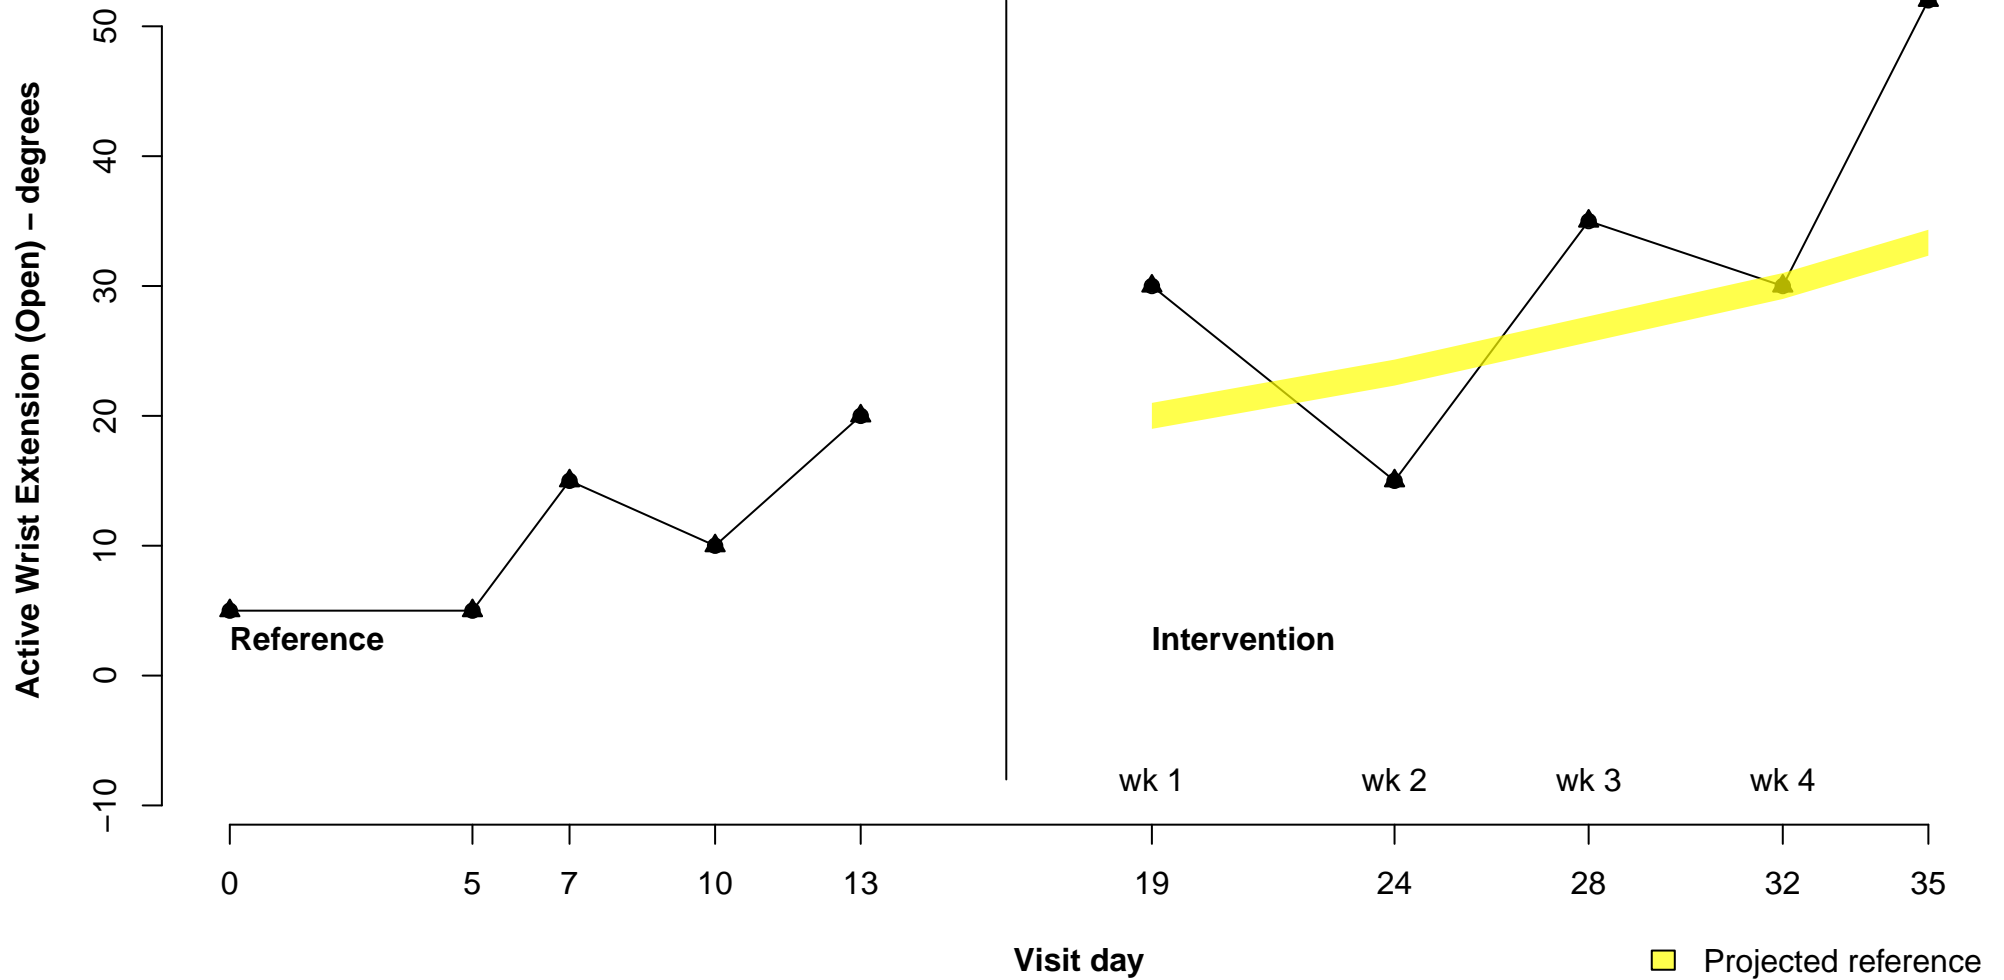

Reference phase trend: minimal (4 deg/visit)  
Reference phase stability: somewhat variable (60% in envelope)  
Level change estimate: minimal  
Intervention phase -1 deg lower than Reference phase  
Average of 2 degree increase across Intervention visits  
20% overlap between phases (PAND)

## Active Wrist Extension (Open)

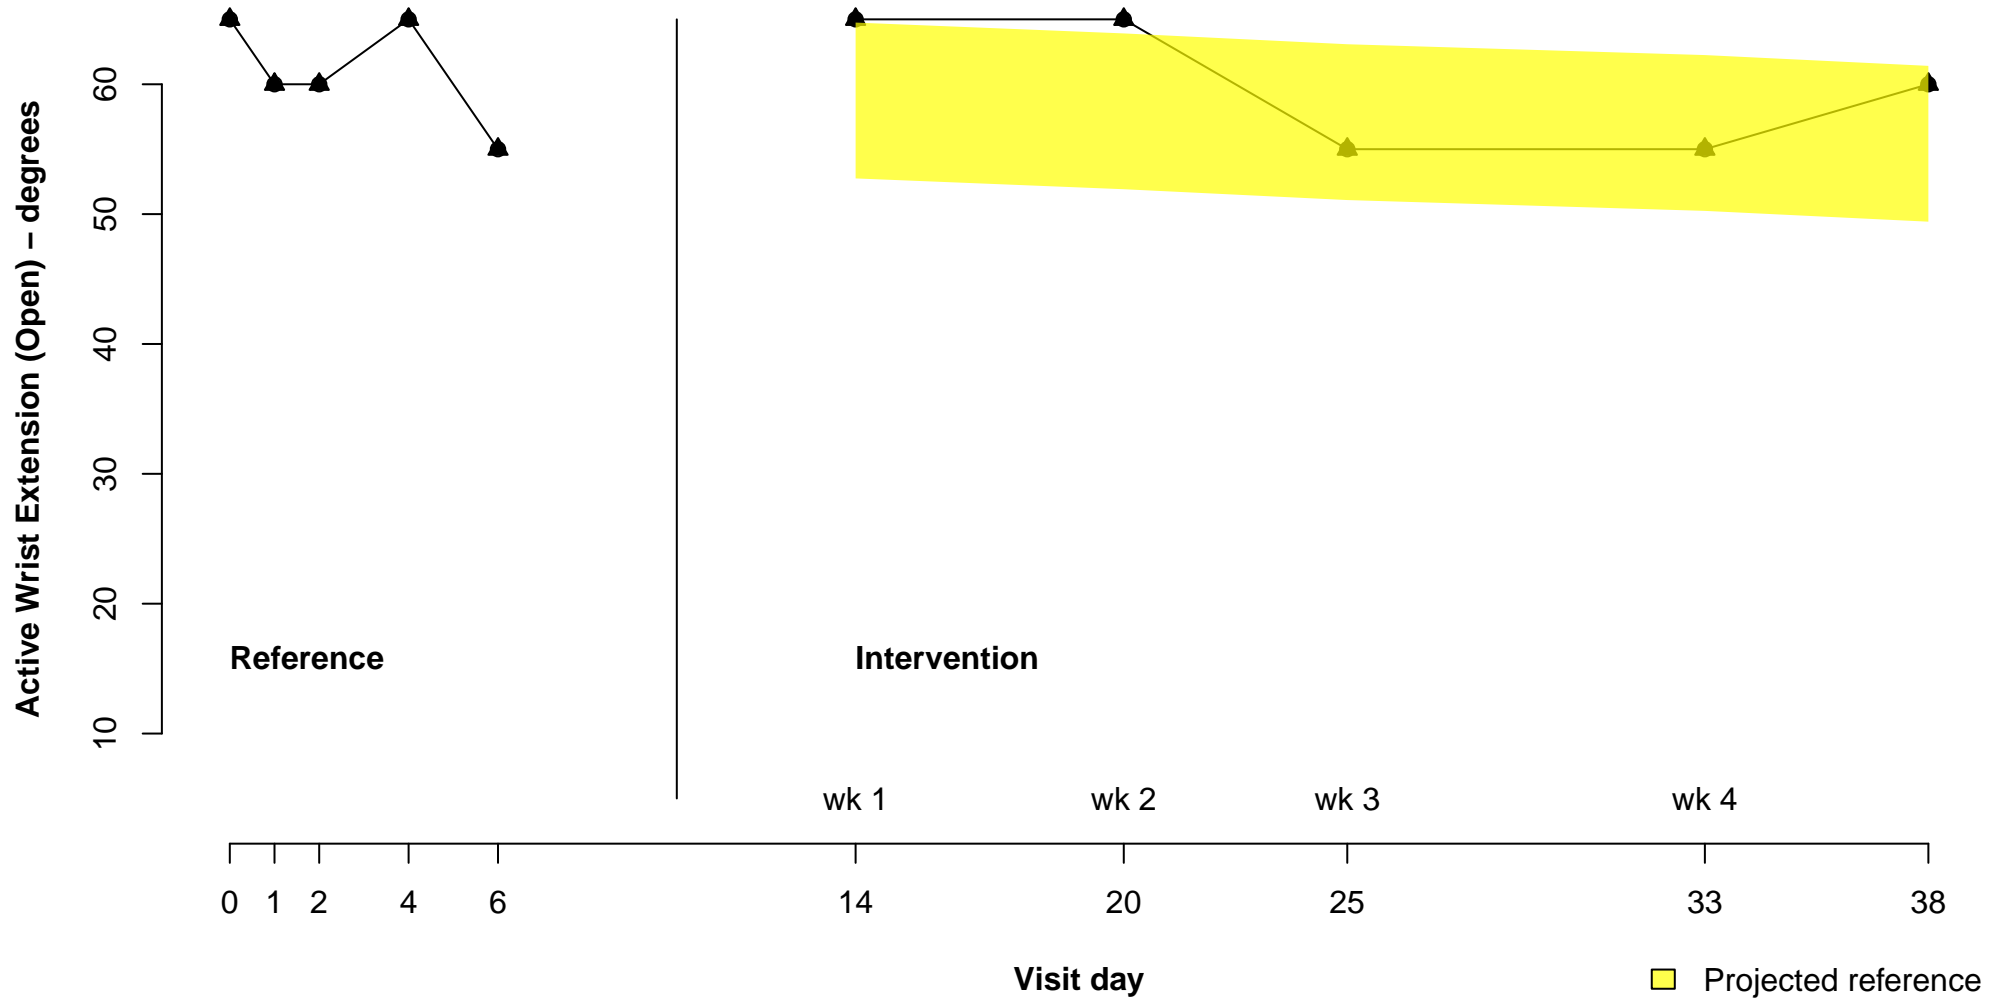

M

Reference phase trend: minimal (-2 deg/visit)

Reference phase stability: stable (100% in envelope)

Level change estimate: moderate

Intervention phase 9 deg higher than Reference phase

Average of 1 degree increase across Intervention visits

10% overlap between phases (PAND)

# Active Wrist Extension (Open)

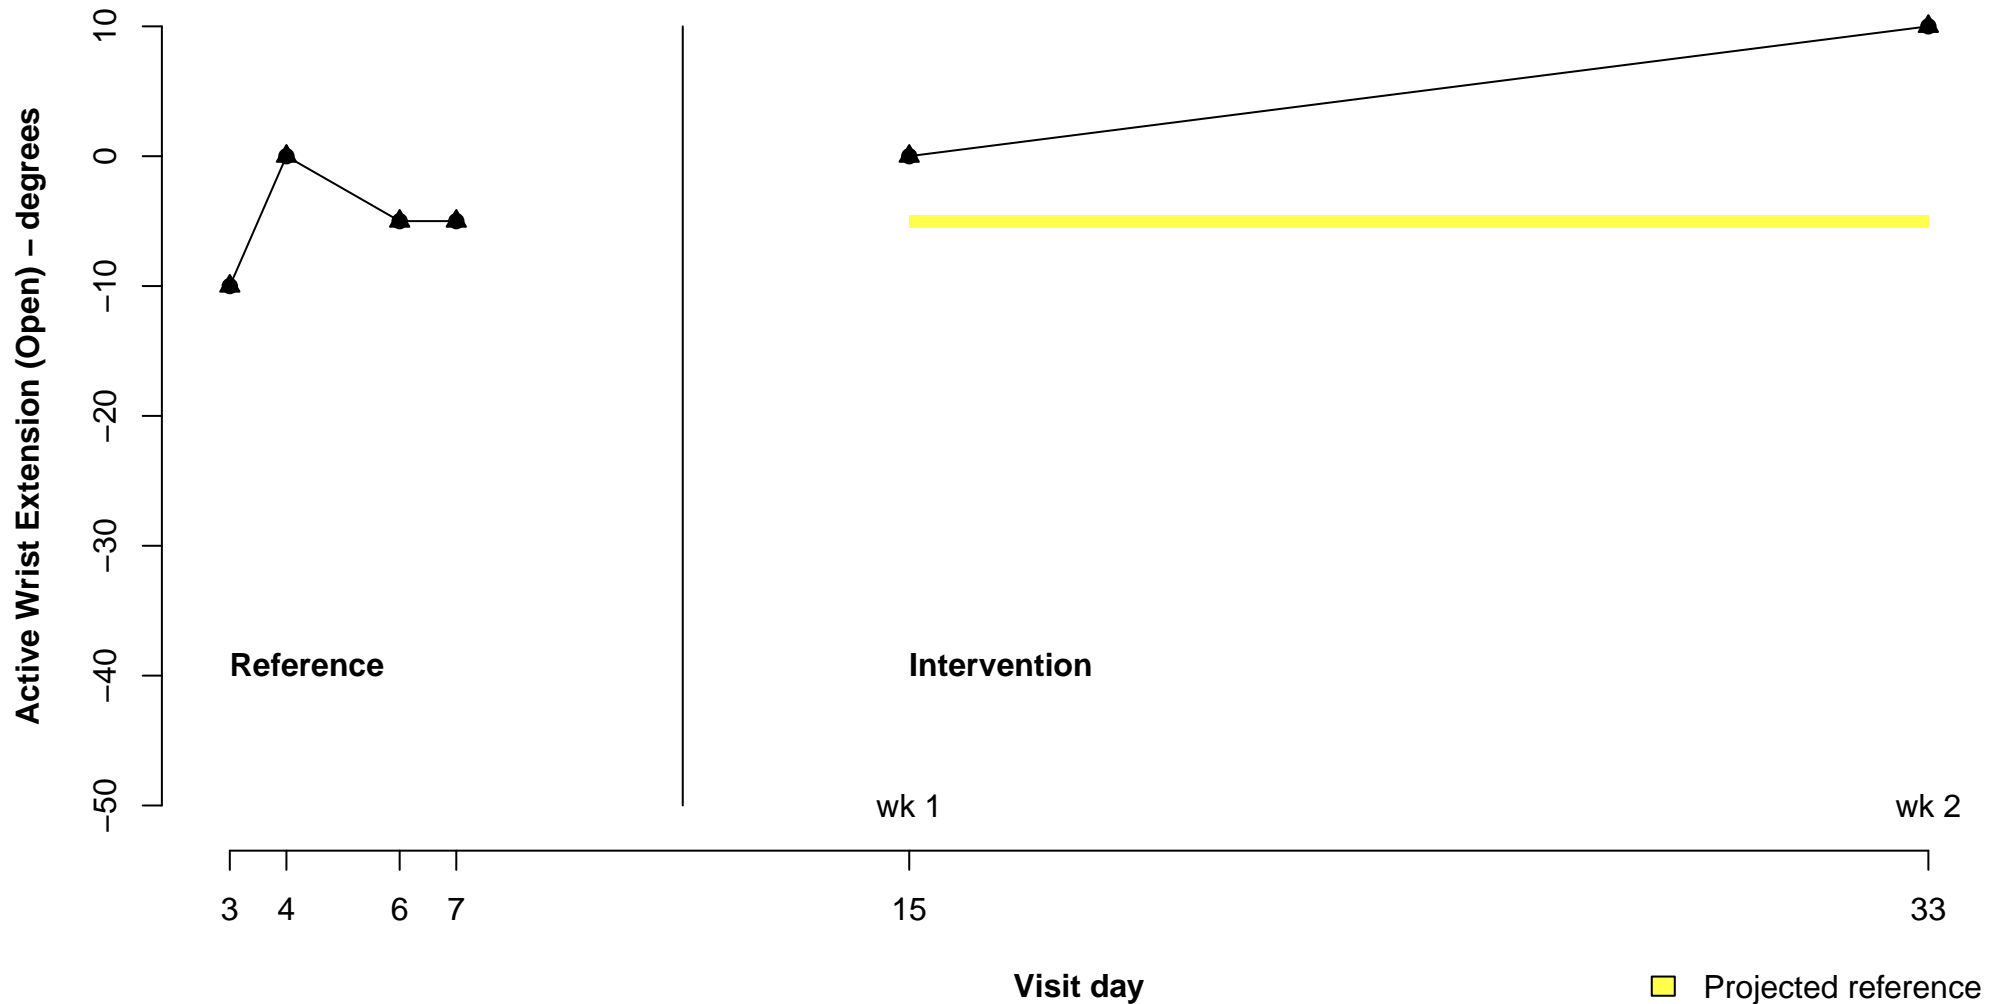

N

Reference phase trend: minimal (2 deg/visit)

Reference phase stability: highly variable (50% in envelope)

Level change estimate: minimal

Intervention phase 1 deg higher than Reference phase

Average of 8 degree increase across Intervention visits

17% overlap between phases (PAND)

# Active Wrist Extension (Open)

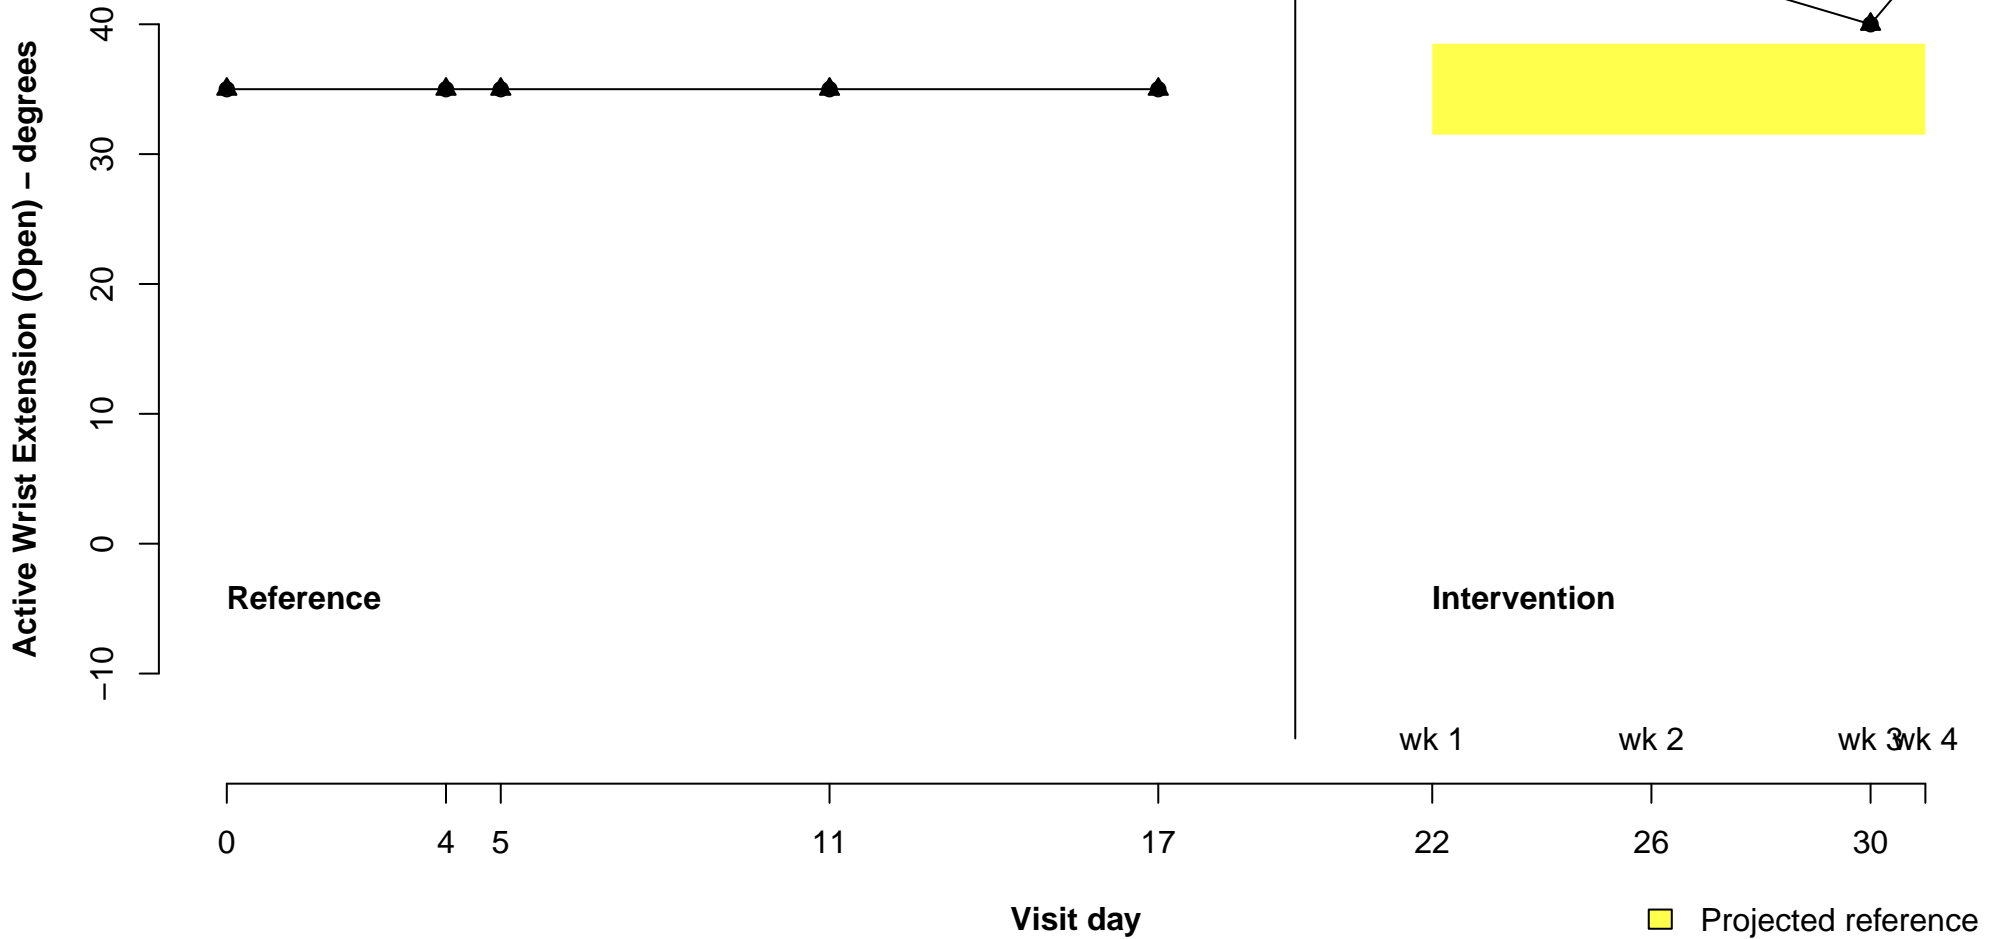

O  
Reference phase trend: minimal (0 deg/visit)  
Reference phase stability: stable (100% in envelope)  
Level change estimate: moderate  
Intervention phase 9 deg higher than Reference phase  
Average of 0 degree increase across Intervention visits  
0% overlap between phases (PAND)

■ Projected reference

# Active Wrist Extension (Open)

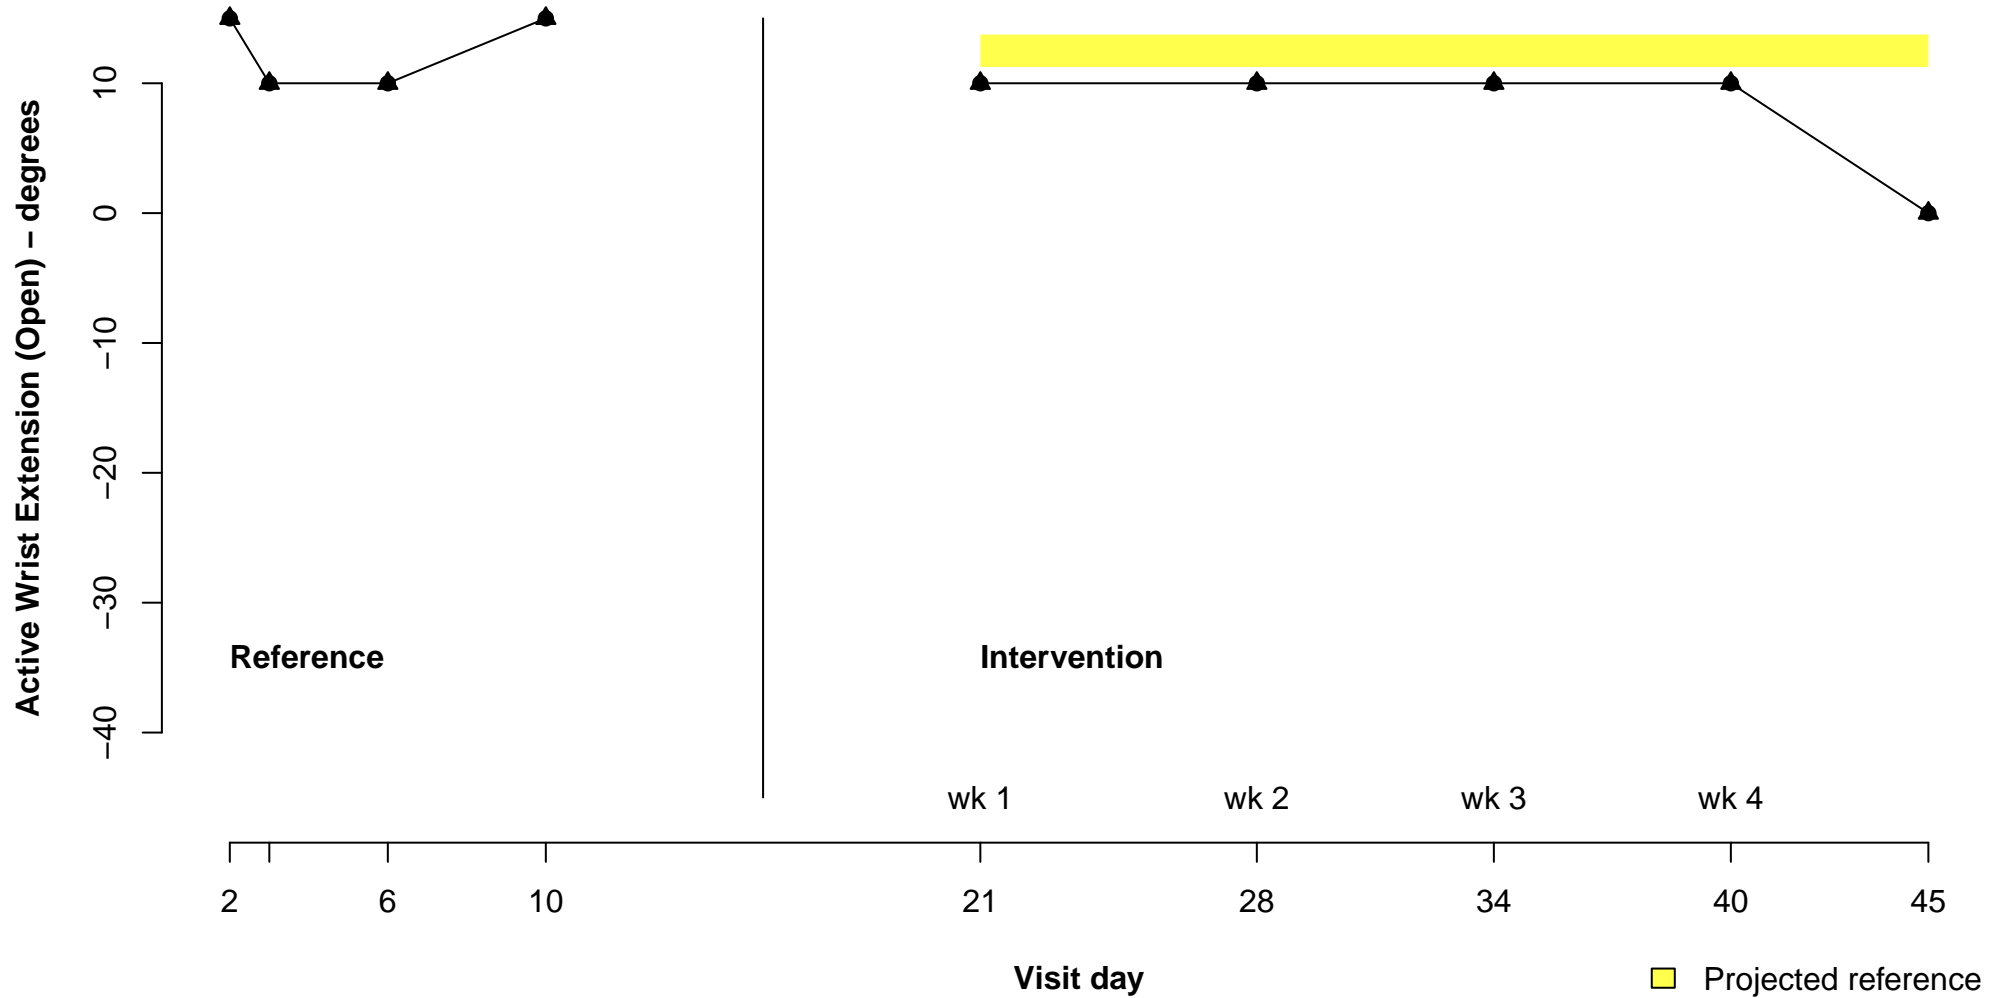

P

Reference phase trend: minimal (0 deg/visit)

Reference phase stability: stable (100% in envelope)

Level change estimate: minimal

Intervention phase 0 deg higher than Reference phase

Average of -2 degree decrease across Intervention visits

44% overlap between phases (PAND)



### Active Wrist Extension (Open)

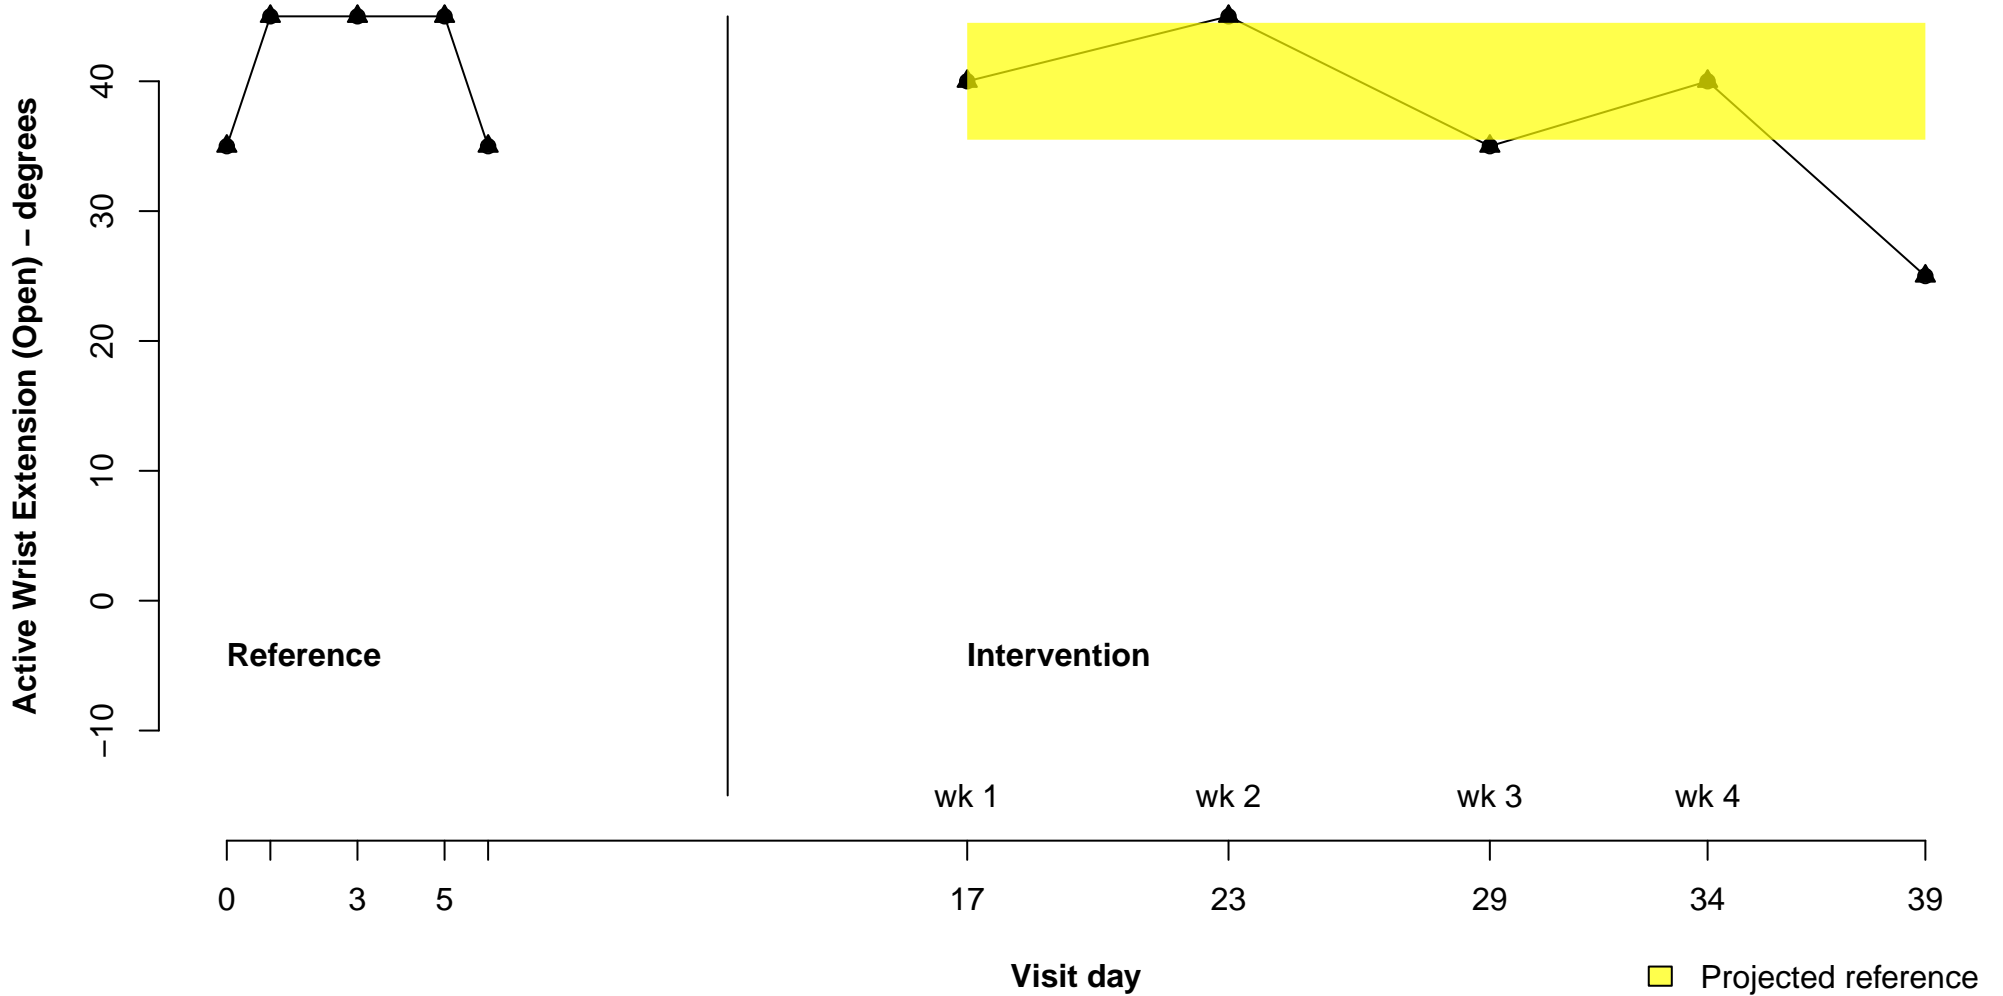

Q

Reference phase trend: minimal (0 deg/visit)

Reference phase stability: stable (100% in envelope)

Level change estimate: minimal

Intervention phase 4 deg higher than Reference phase

Average of -4 degree decrease across Intervention visits

50% overlap between phases (PAND)

# Active Wrist Extension (Open)

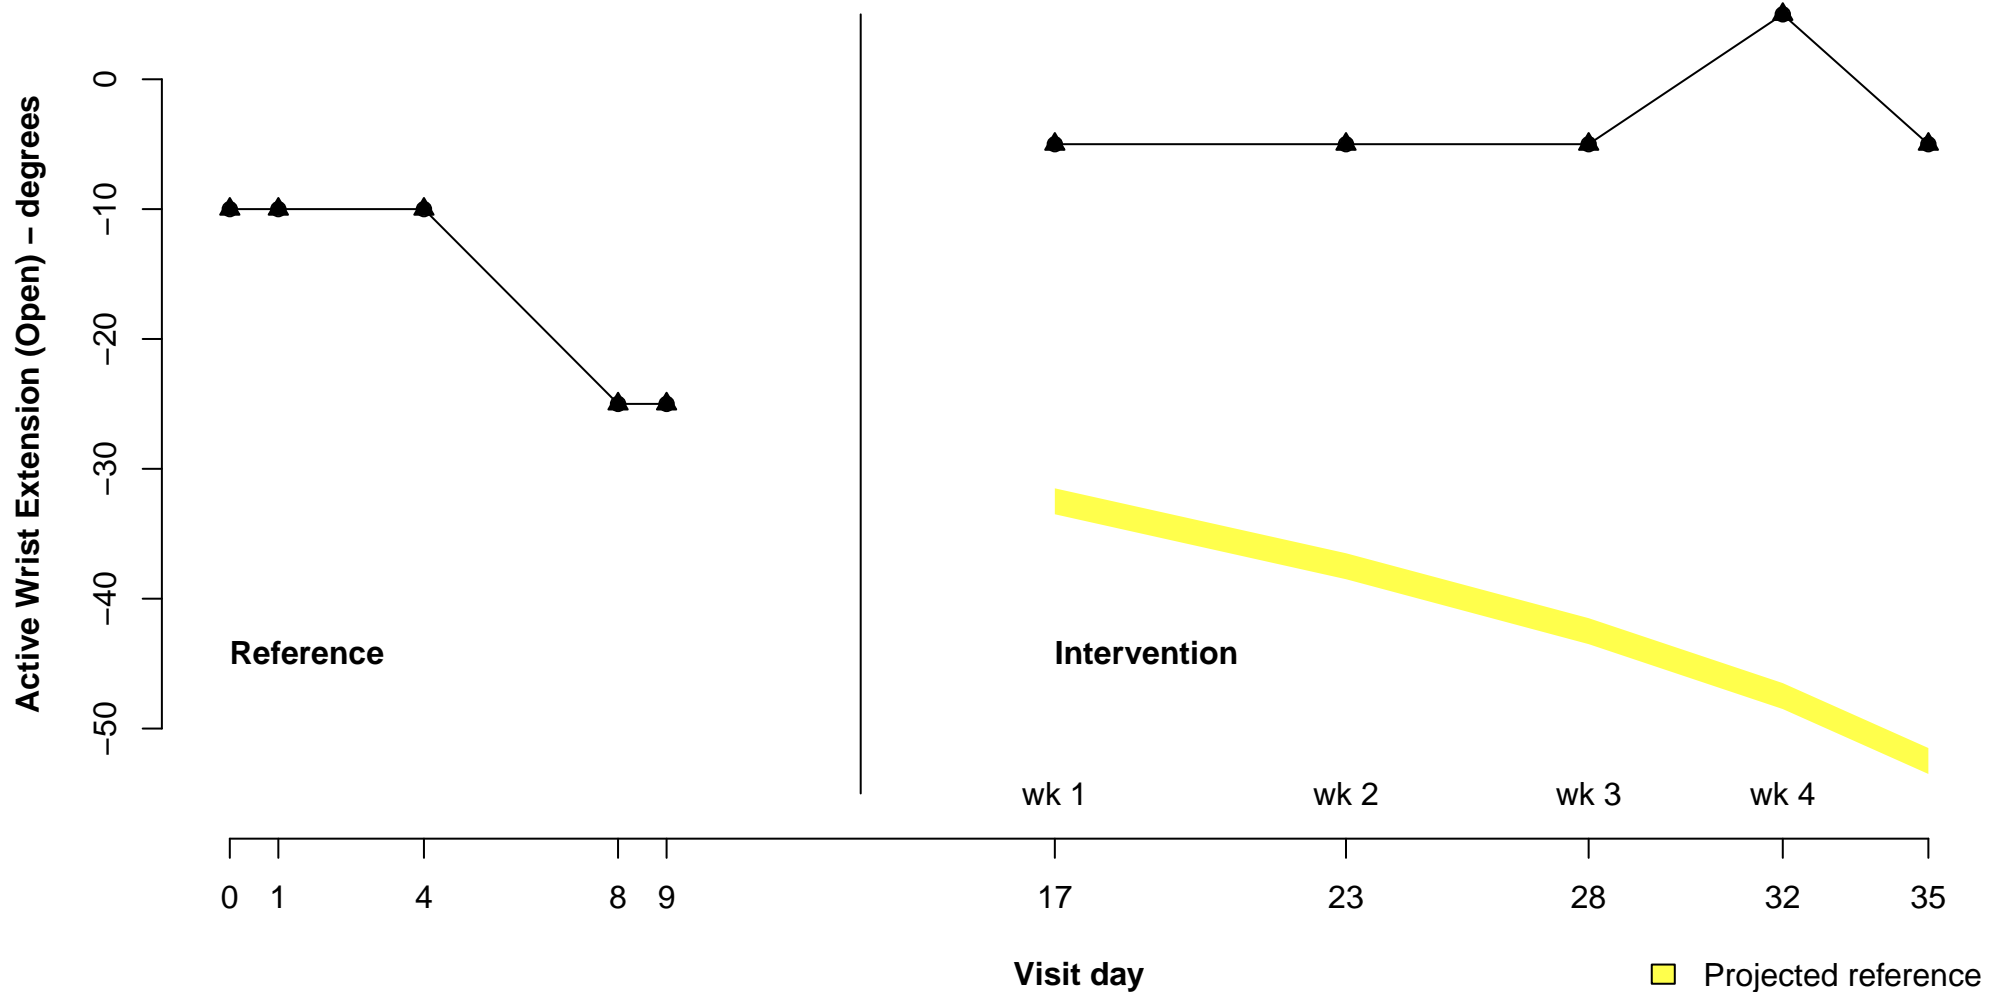

R  
Reference phase trend: minimal (-4 deg/visit)  
Reference phase stability: stable (100% in envelope)  
Level change estimate: large  
Intervention phase 24 deg higher than Reference phase  
Average of 4 degree increase across Intervention visits  
0% overlap between phases (PAND)

# Active Wrist Extension (Open)

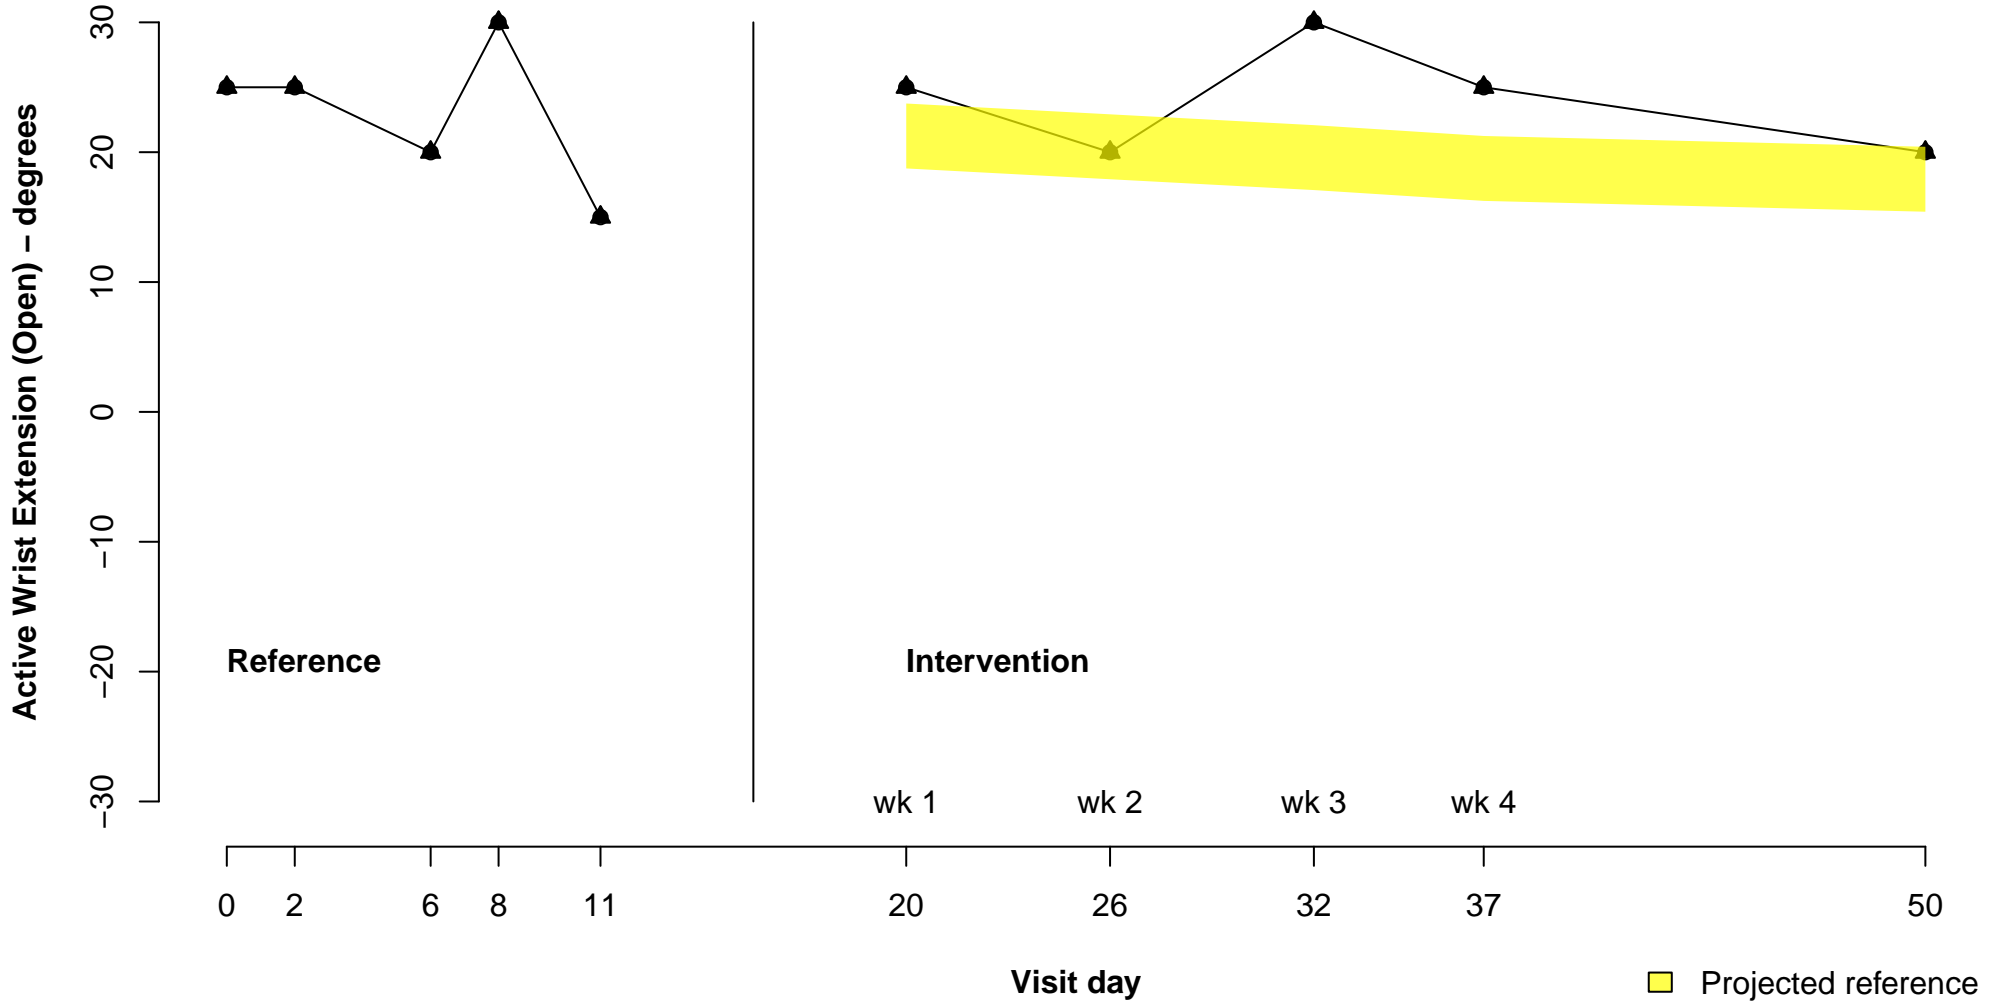

S

Reference phase trend: minimal (-2 deg/visit)  
Reference phase stability: stable (80% in envelope)  
Level change estimate: moderate  
Intervention phase 11 deg higher than Reference phase  
Average of 1 degree increase across Intervention visits  
10% overlap between phases (PAND)

## Non-Dominant Grip Strength

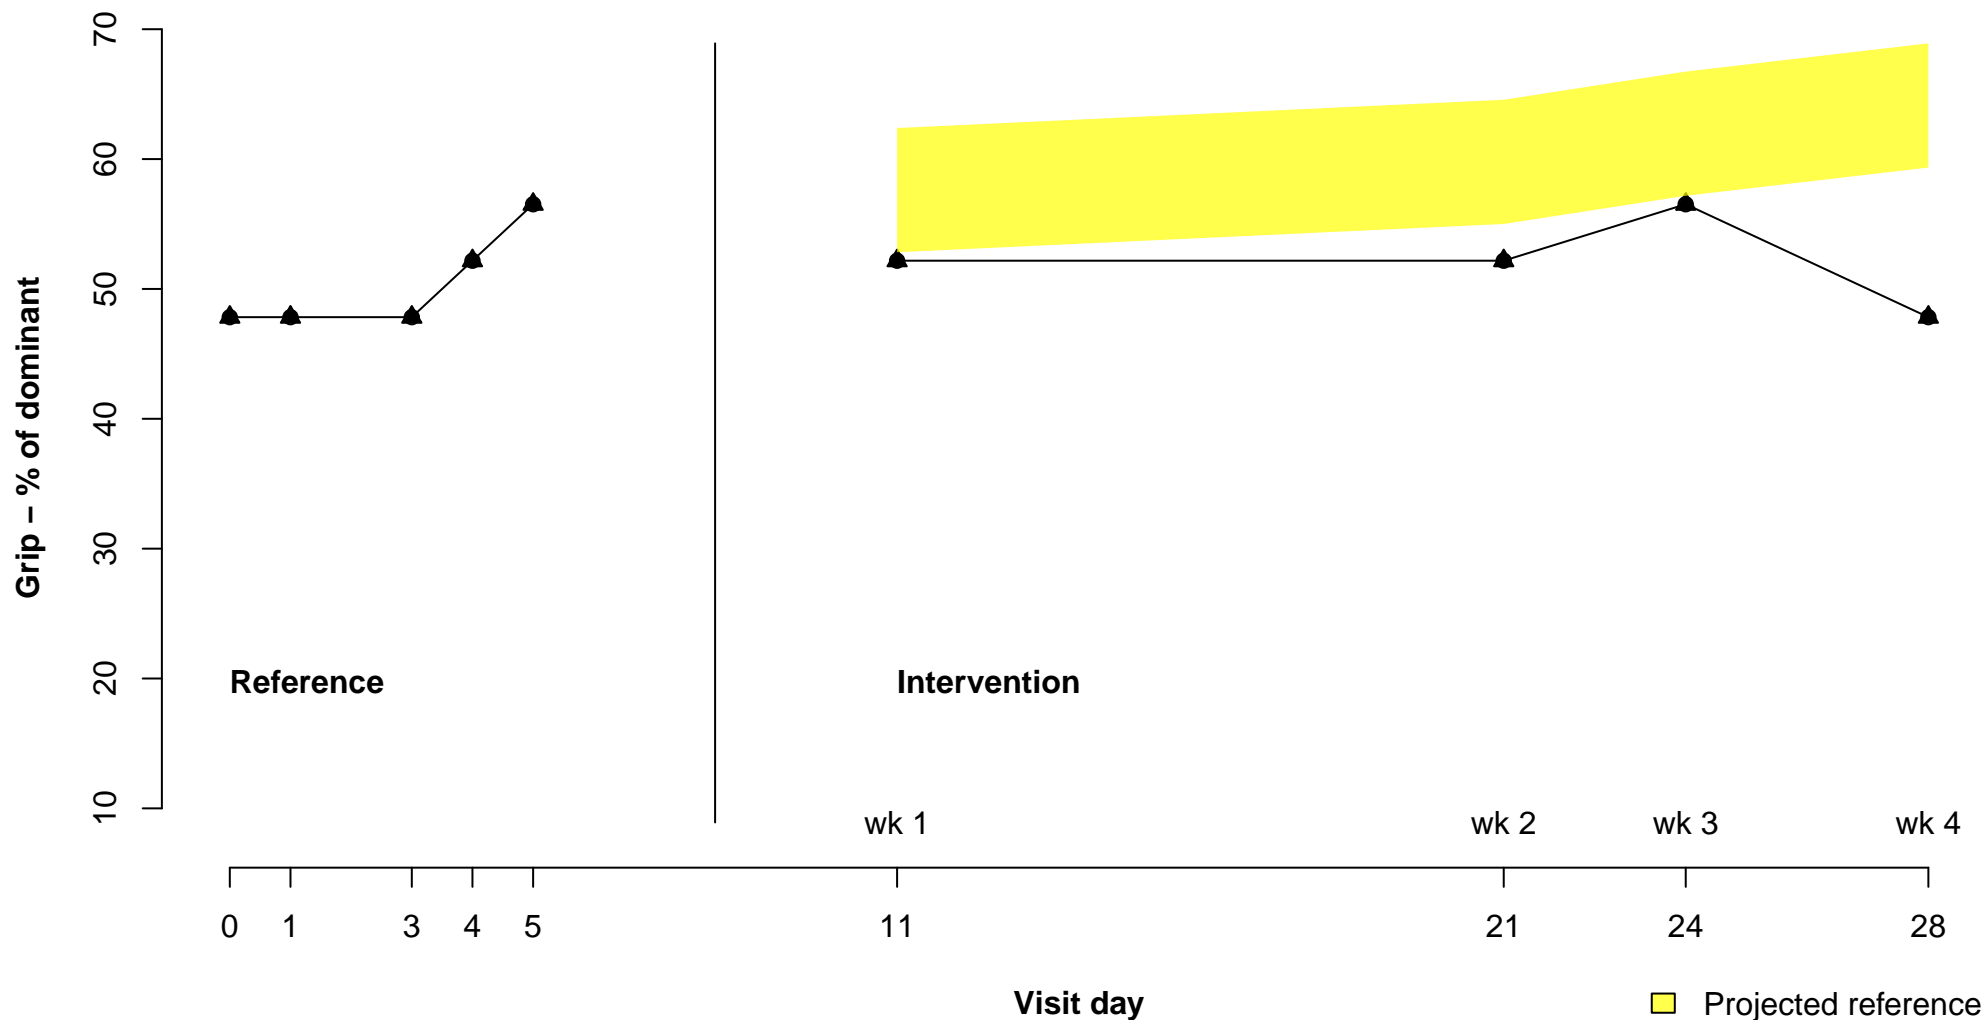

A

Reference phase trend: minimal (2 %/visit)

Reference phase stability: highly variable (40% in envelope)

Level change estimate: minimal

Intervention phase -3 % lower than Reference phase

Average of -4 % decrease across Intervention visits

44% overlap between phases (PAND)

## Non-Dominant Grip Strength

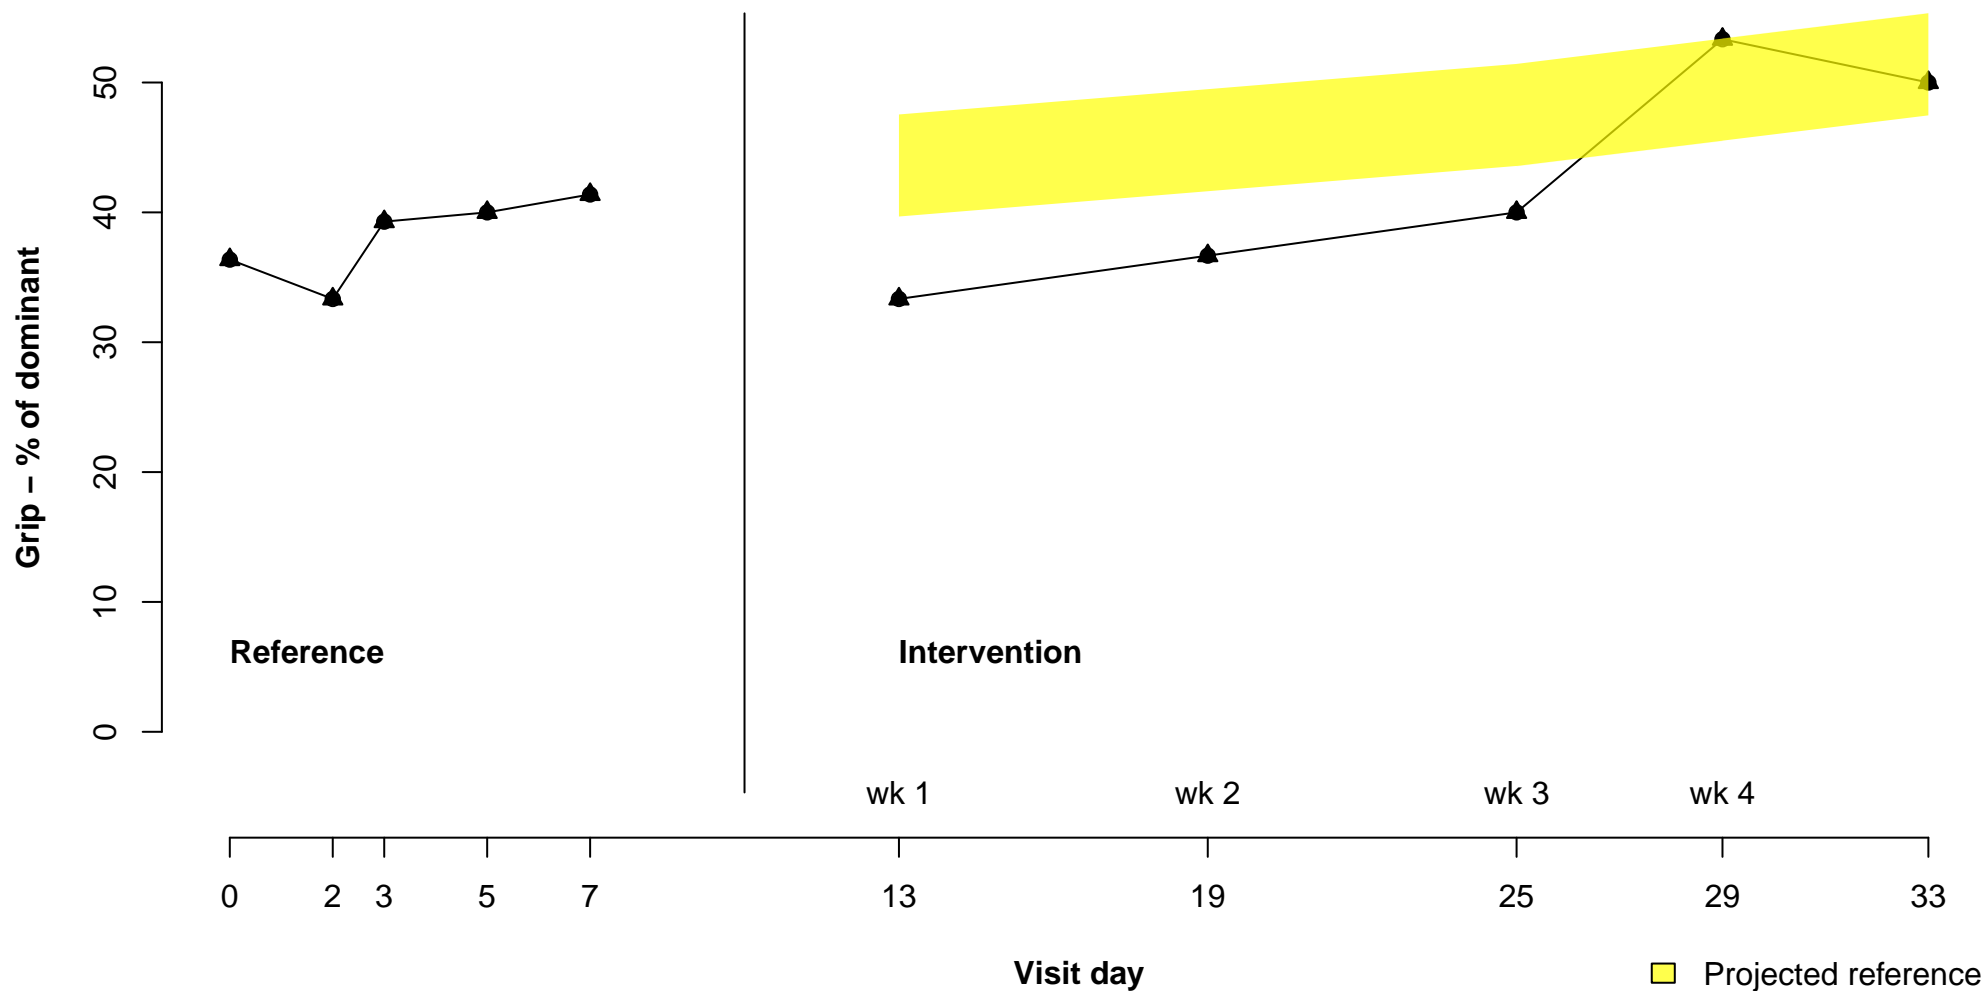

B  
Reference phase trend: minimal (1 %/visit)  
Reference phase stability: somewhat variable (60% in envelope)  
Level change estimate: moderate  
Intervention phase -8 % lower than Reference phase  
Average of 3 % increase across Intervention visits  
30% overlap between phases (PAND)

# Non-Dominant Grip Strength

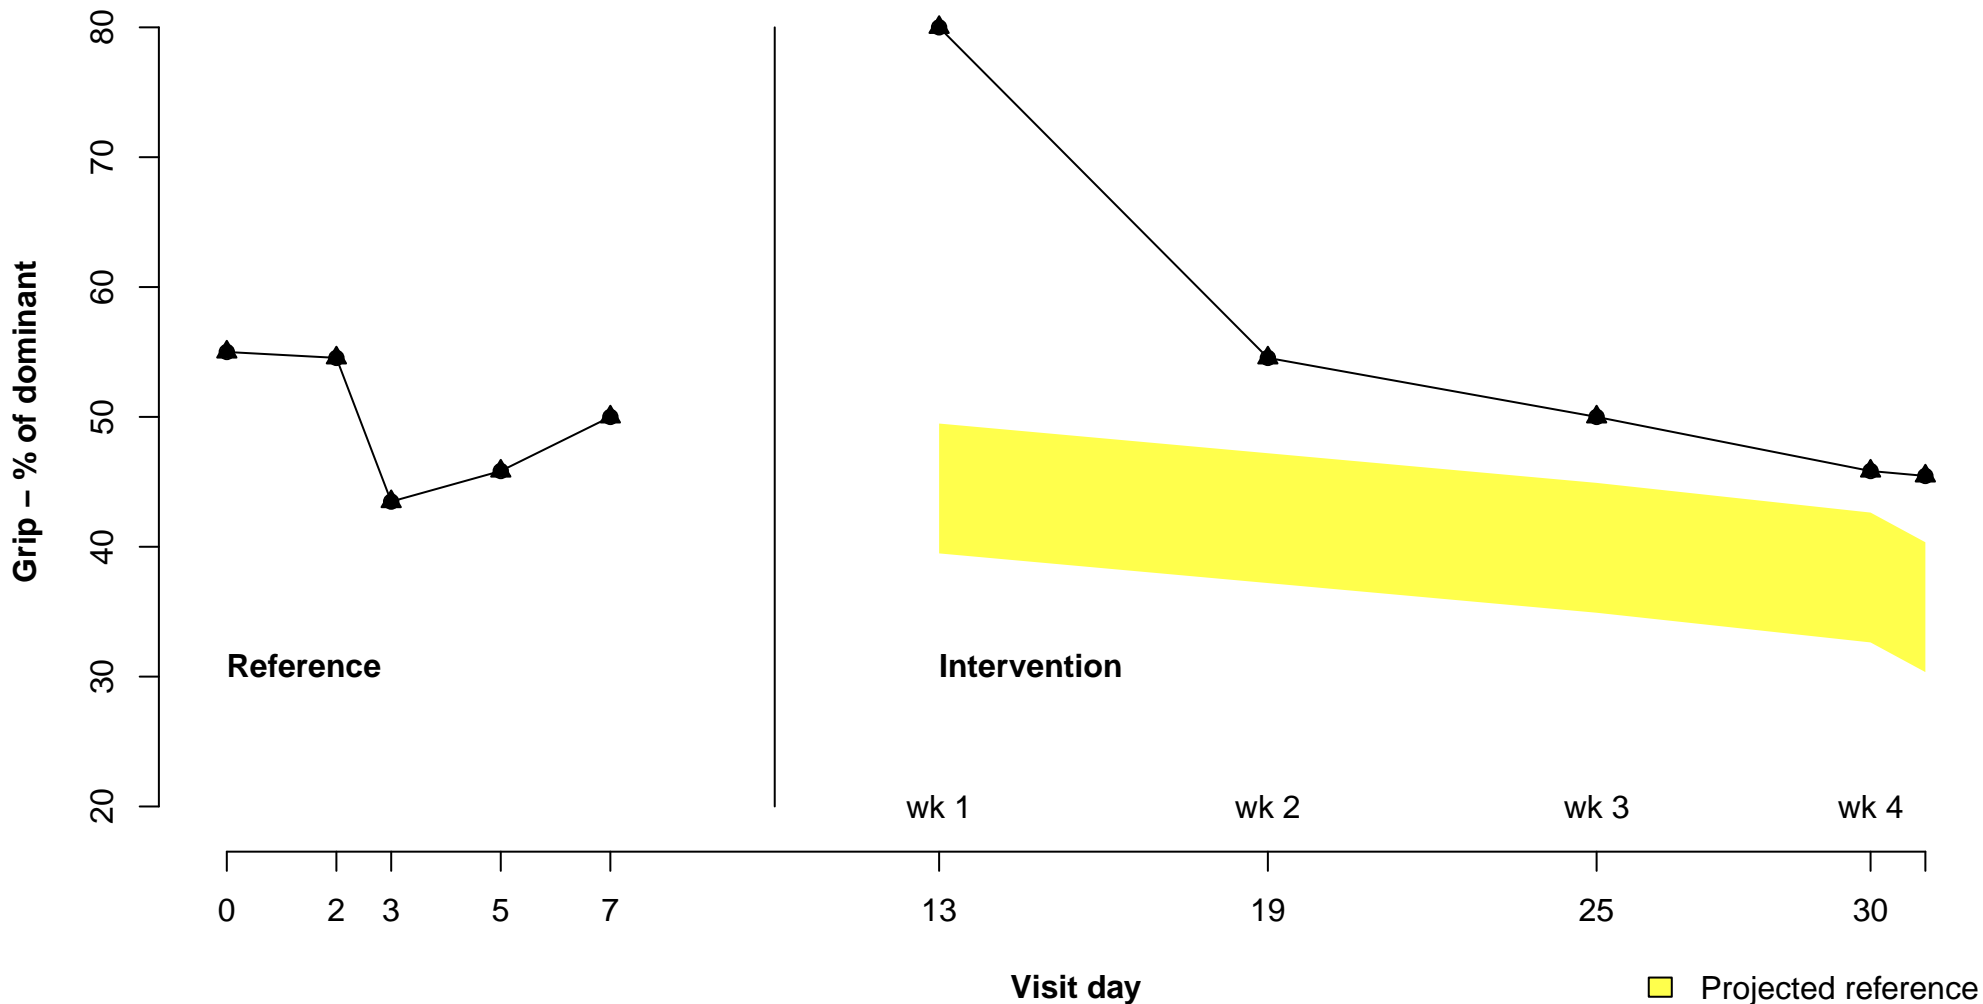

C

Reference phase trend: minimal (-1 %/visit)

Reference phase stability: stable (100% in envelope)

Level change estimate: large

Intervention phase 26 % higher than Reference phase

Average of -7 % decrease across Intervention visits

0% overlap between phases (PAND)

## Non-Dominant Grip Strength

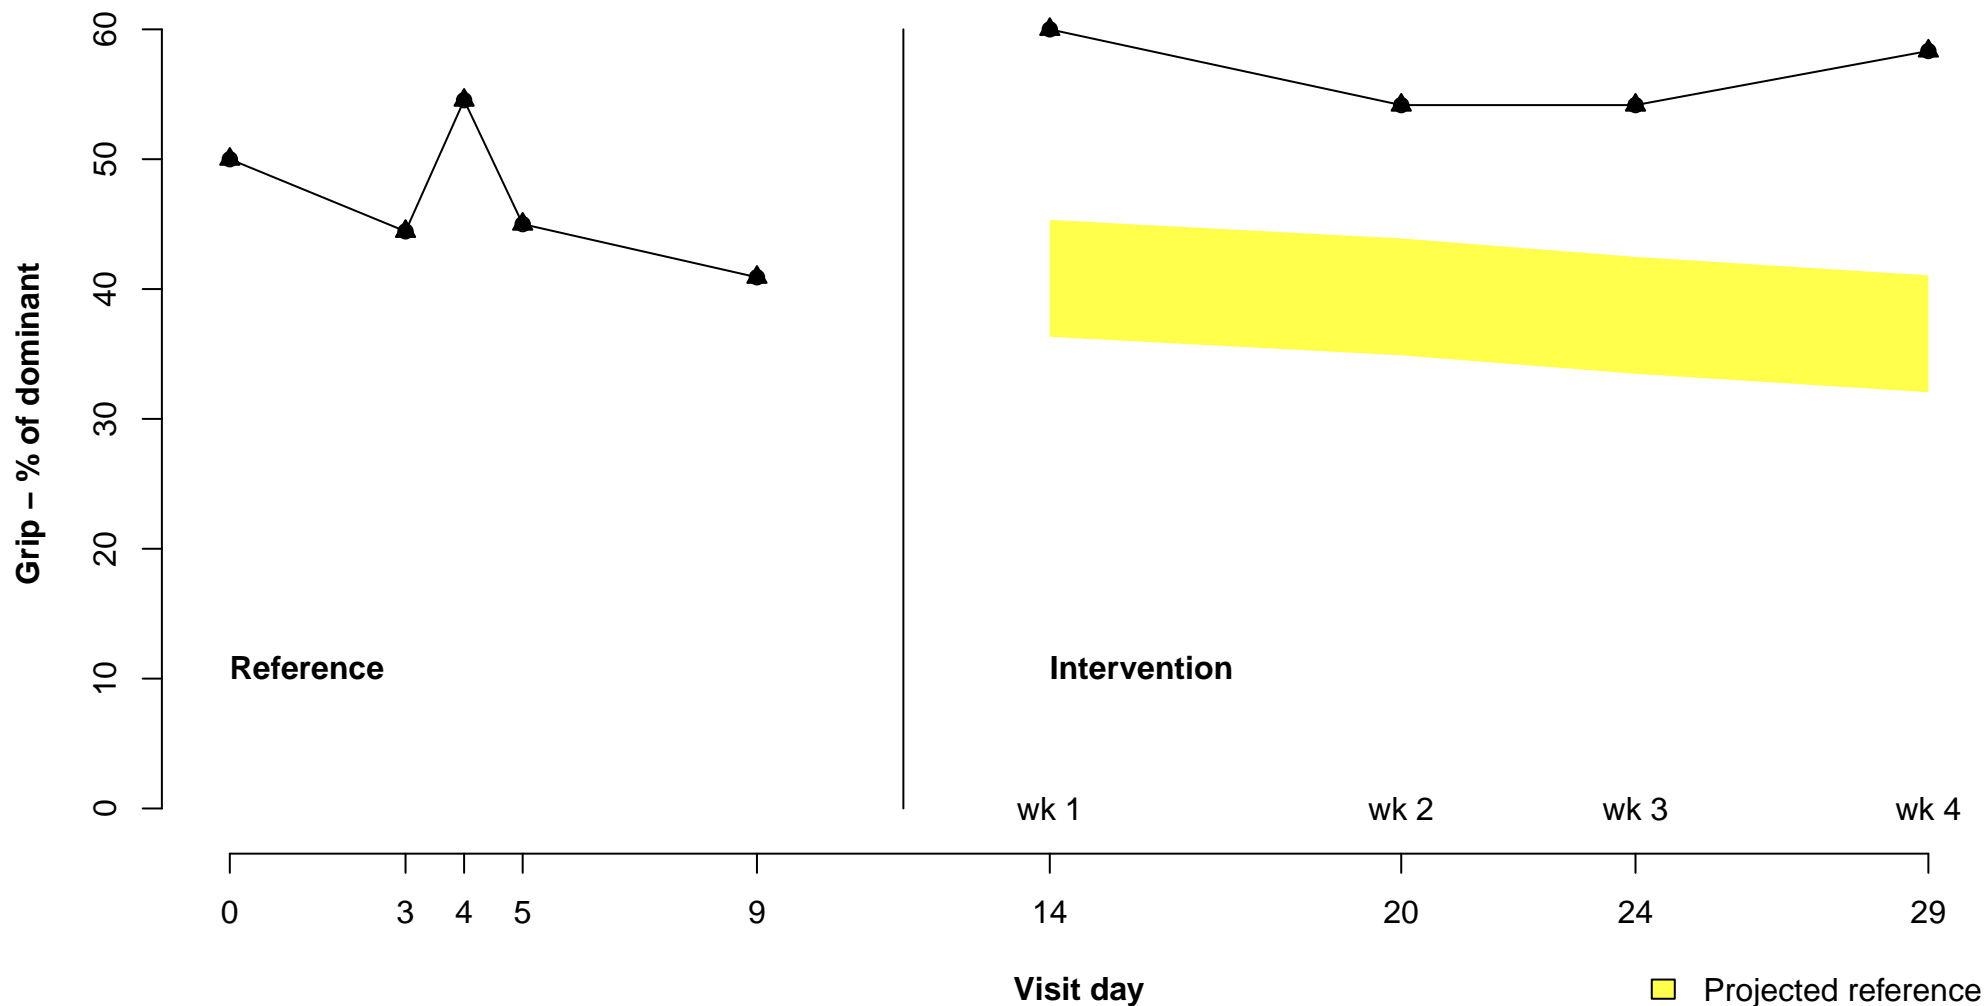

D

Reference phase trend: minimal (-2 %/visit)

Reference phase stability: somewhat variable (60% in envelope)

Level change estimate: large

Intervention phase 17 % higher than Reference phase

Average of 2 % increase across Intervention visits

0% overlap between phases (PAND)

## Non-Dominant Grip Strength

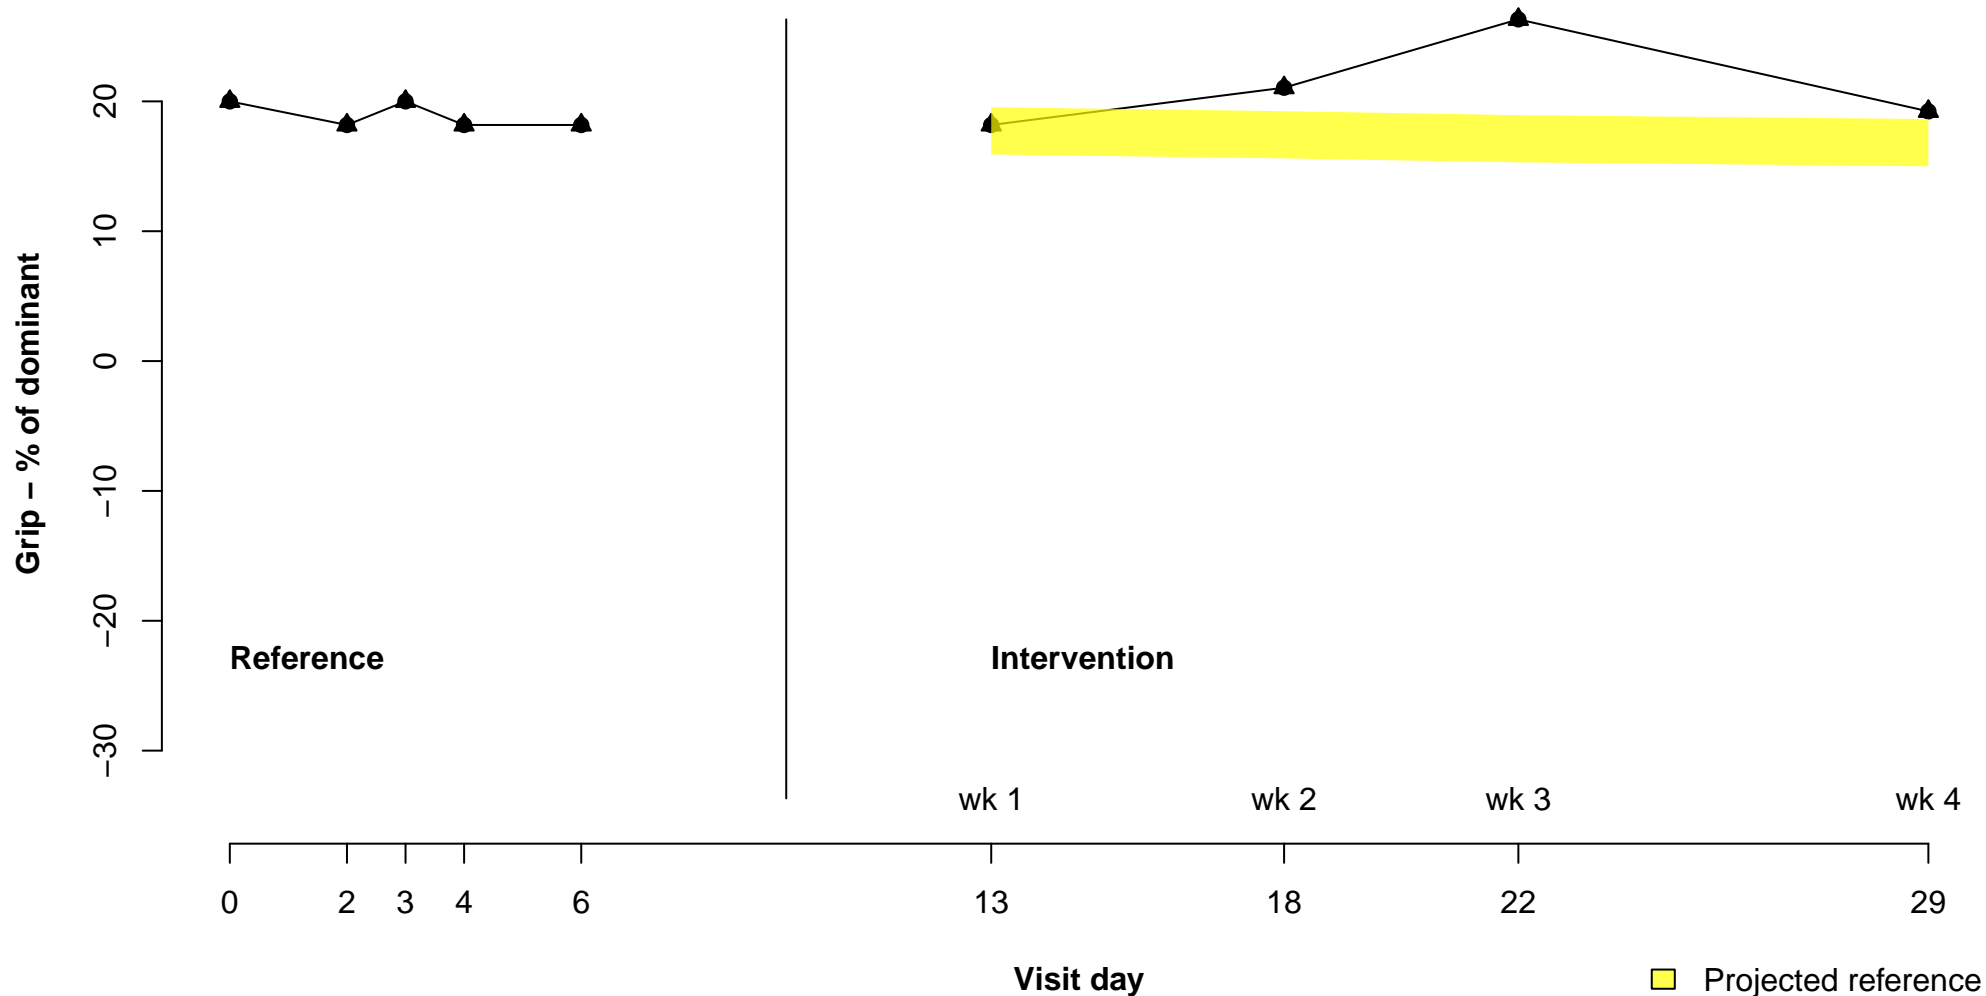

E

Reference phase trend: minimal (0 %/visit)  
Reference phase stability: stable (100% in envelope)  
Level change estimate: minimal  
Intervention phase 3 % higher than Reference phase  
Average of 1 % increase across Intervention visits  
11% overlap between phases (PAND)



## Non-Dominant Grip Strength

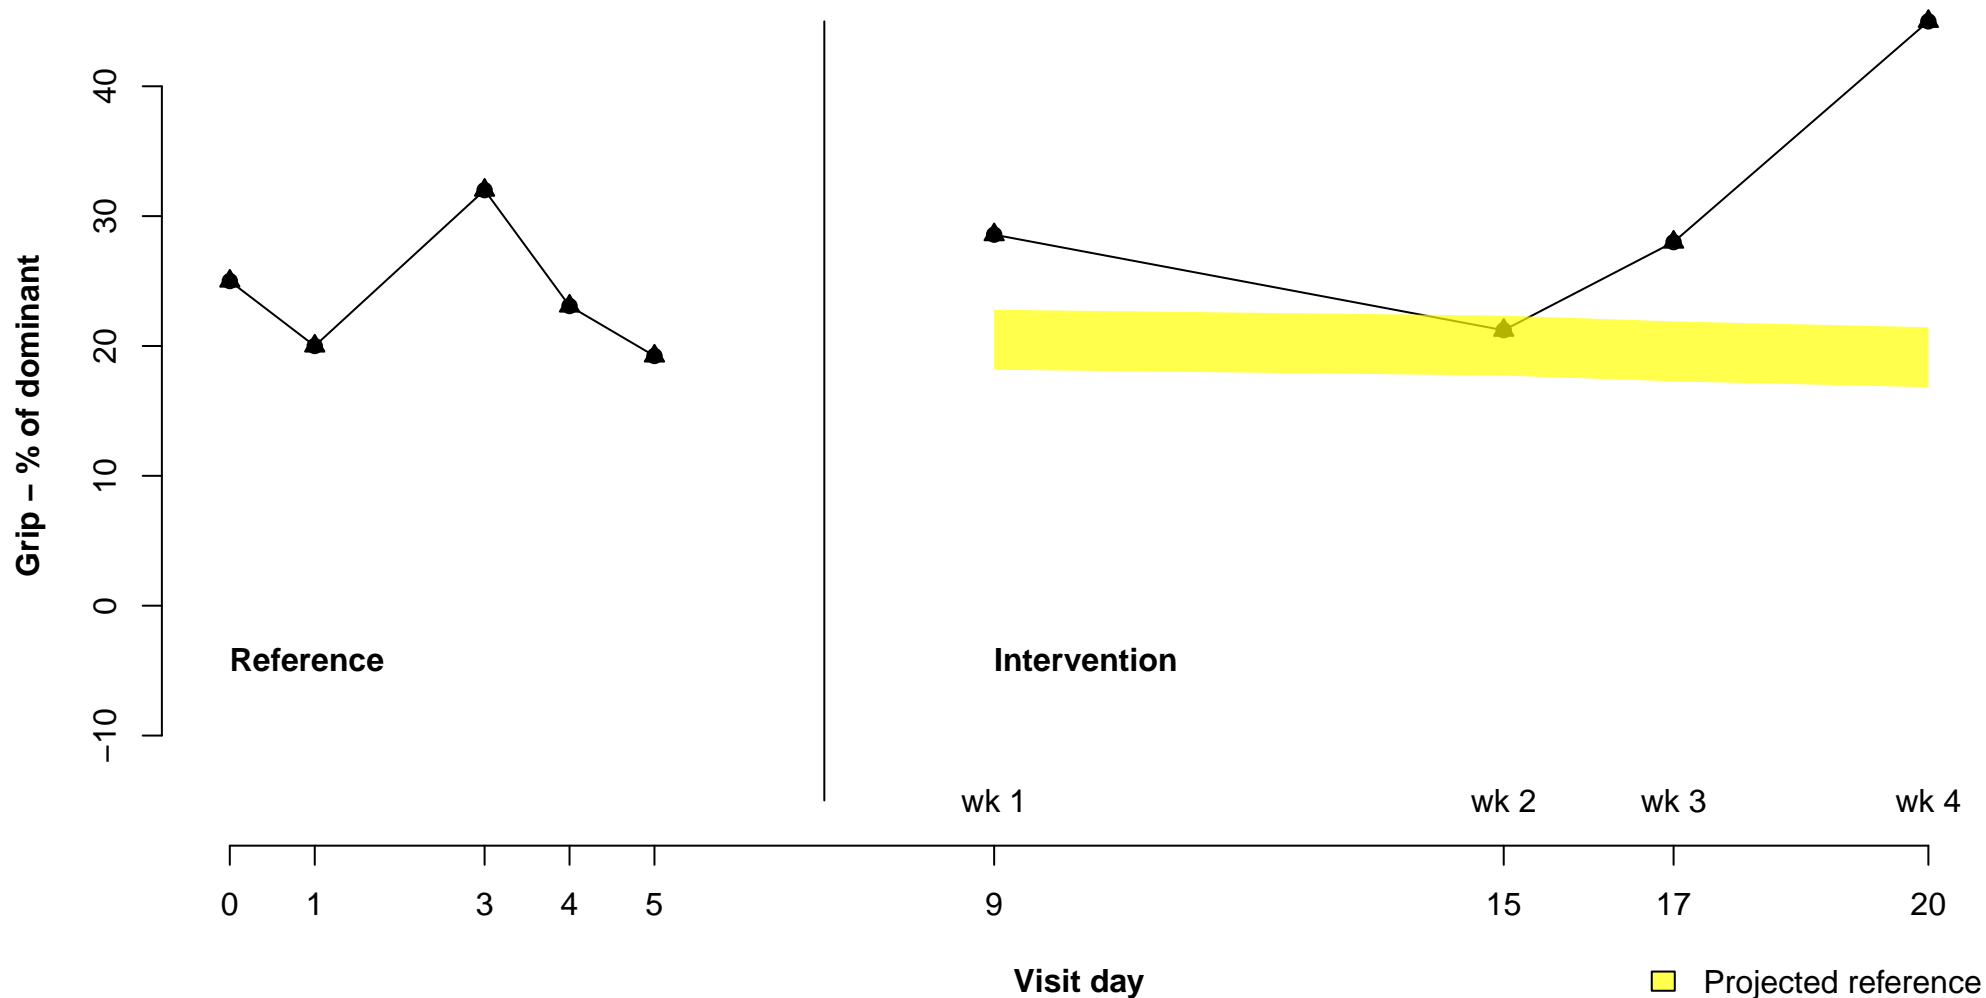

F

Reference phase trend: minimal (-1 %/visit)

Reference phase stability: stable (80% in envelope)

Level change estimate: minimal

Intervention phase 3 % higher than Reference phase

Average of 7 % increase across Intervention visits

11% overlap between phases (PAND)

# Non-Dominant Grip Strength

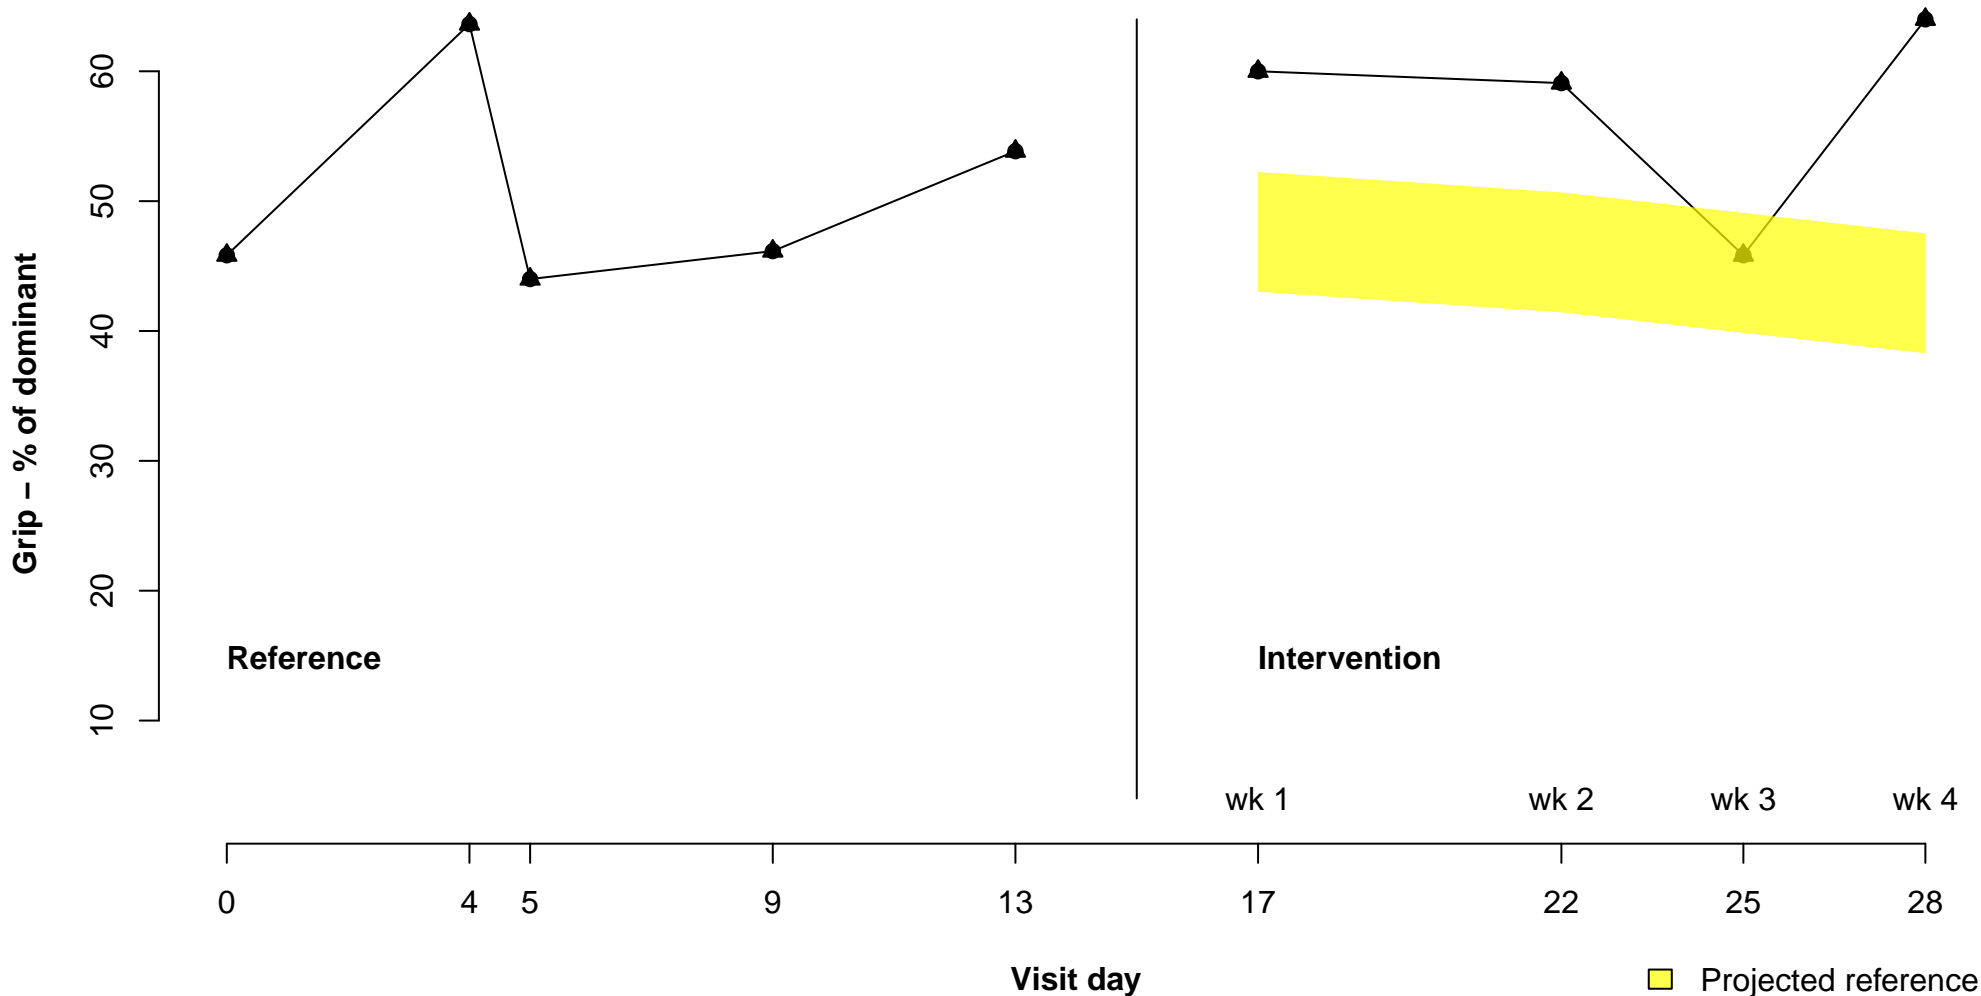

G

Reference phase trend: minimal (2 %/visit)

Reference phase stability: stable (80% in envelope)

Level change estimate: minimal

Intervention phase -1 % lower than Reference phase

Average of -1 % decrease across Intervention visits

22% overlap between phases (PAND)

## Non-Dominant Grip Strength

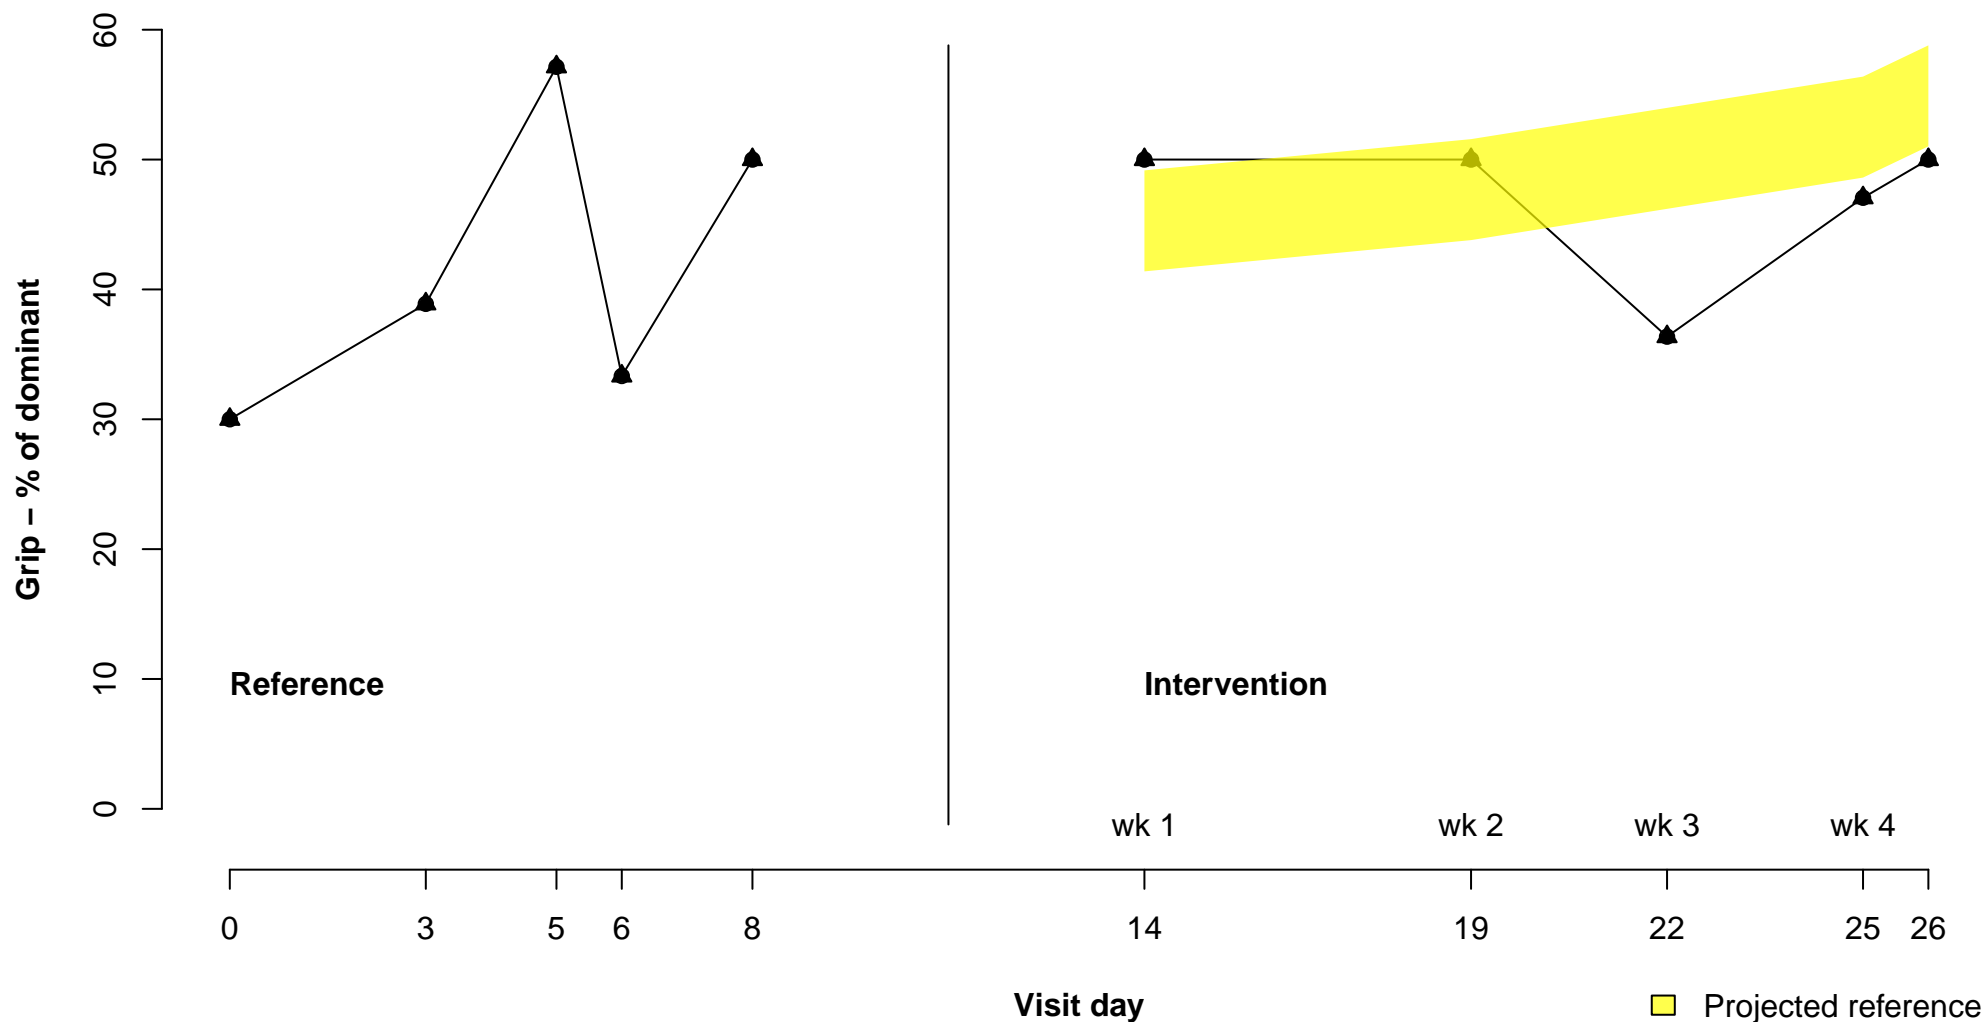

H

Reference phase trend: minimal (5 %/visit)

Reference phase stability: stable (100% in envelope)

Level change estimate: moderate

Intervention phase -10 % lower than Reference phase

Average of -5 % decrease across Intervention visits

50% overlap between phases (PAND)

# Non-Dominant Grip Strength

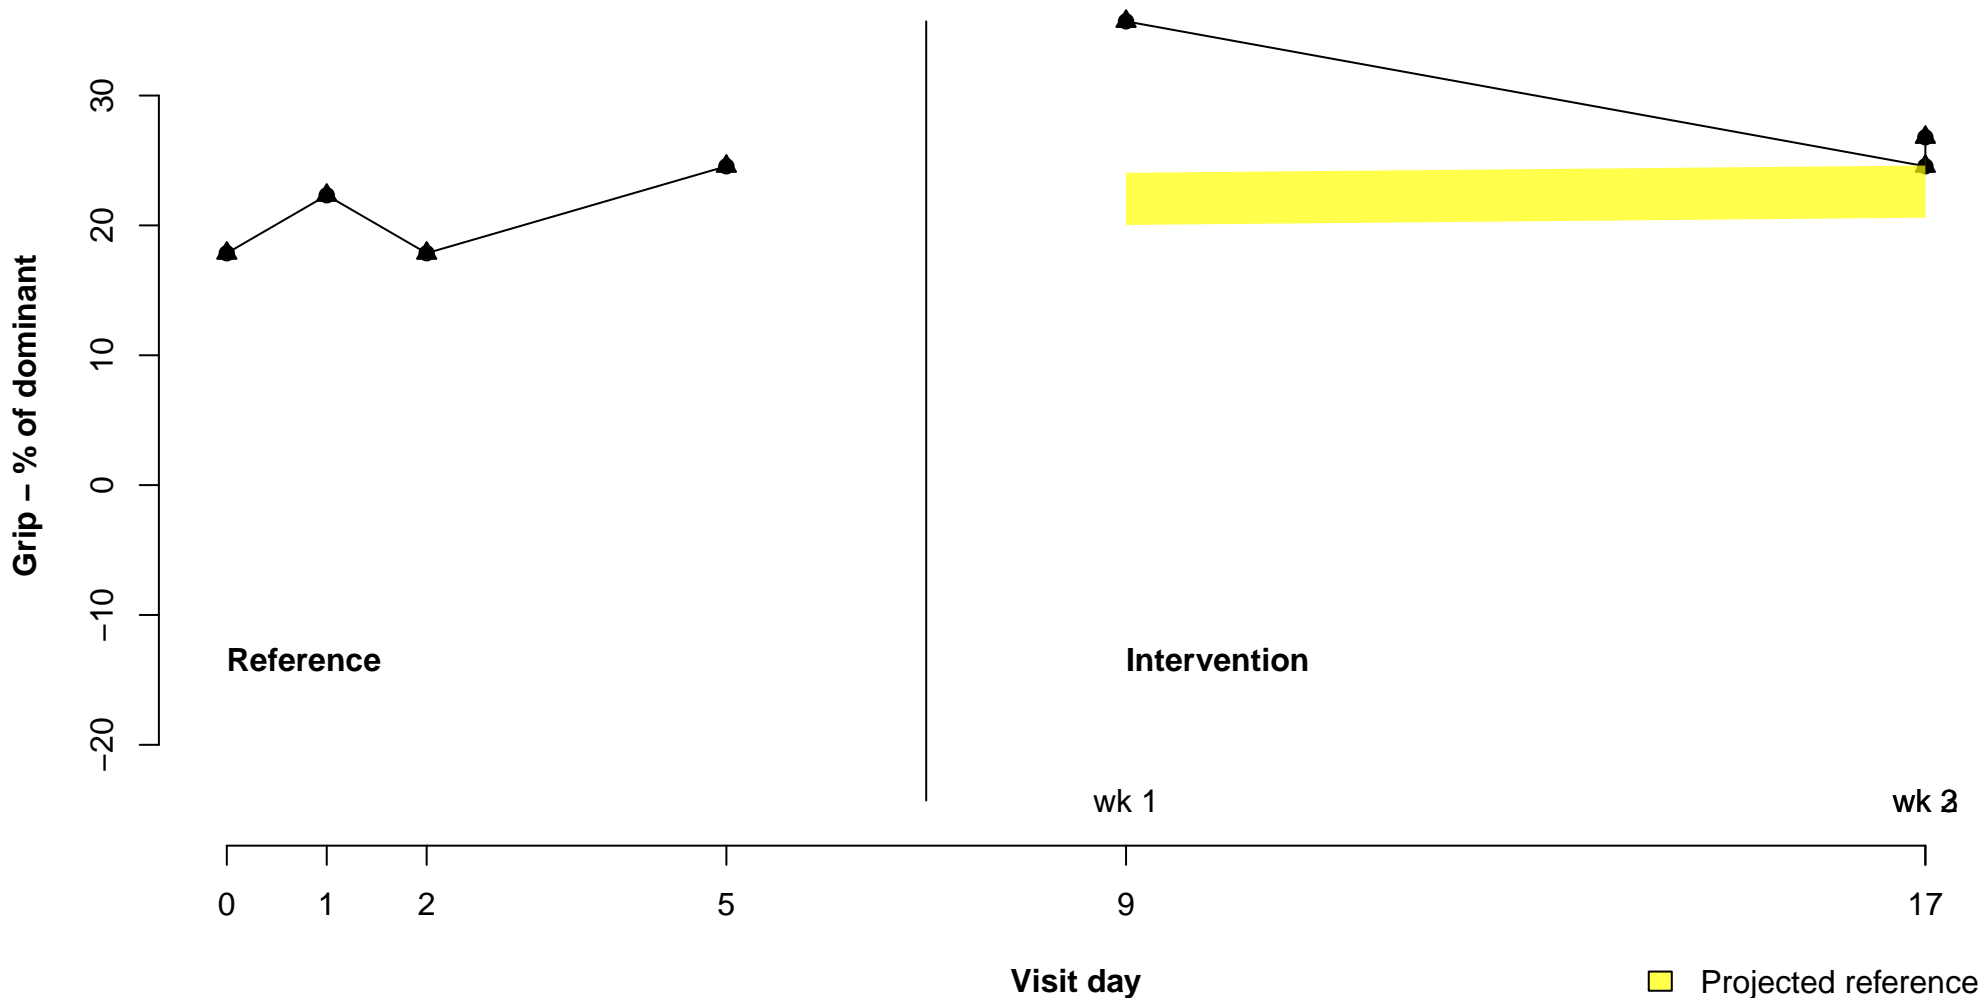

Reference phase trend: minimal (2 %/visit)  
Reference phase stability: stable (100% in envelope)  
Level change estimate: moderate  
Intervention phase 7 % higher than Reference phase  
Average of -7 % decrease across Intervention visits  
29% overlap between phases (PAND)

# Non-Dominant Grip Strength

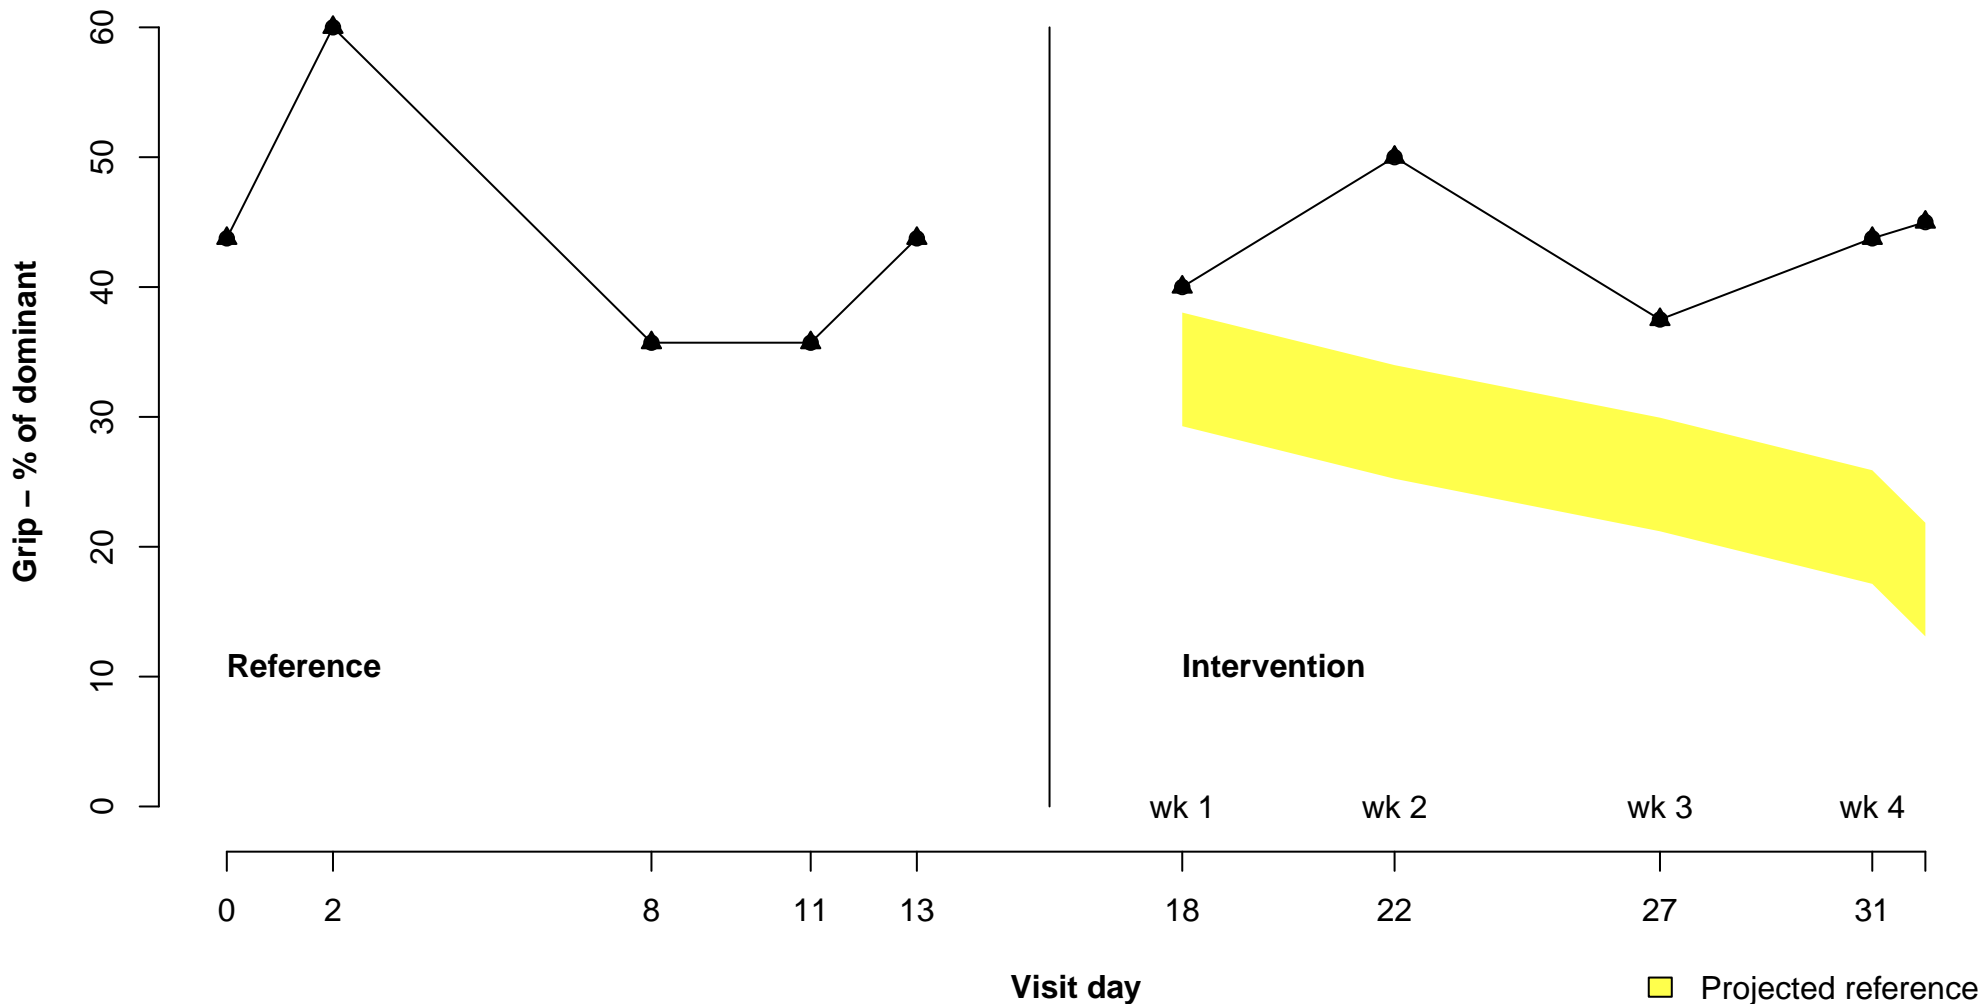

J  
Reference phase trend: minimal (0 %/visit)  
Reference phase stability: stable (80% in envelope)  
Level change estimate: minimal  
Intervention phase -3 % lower than Reference phase  
Average of 1 % increase across Intervention visits  
30% overlap between phases (PAND)

# Non-Dominant Grip Strength

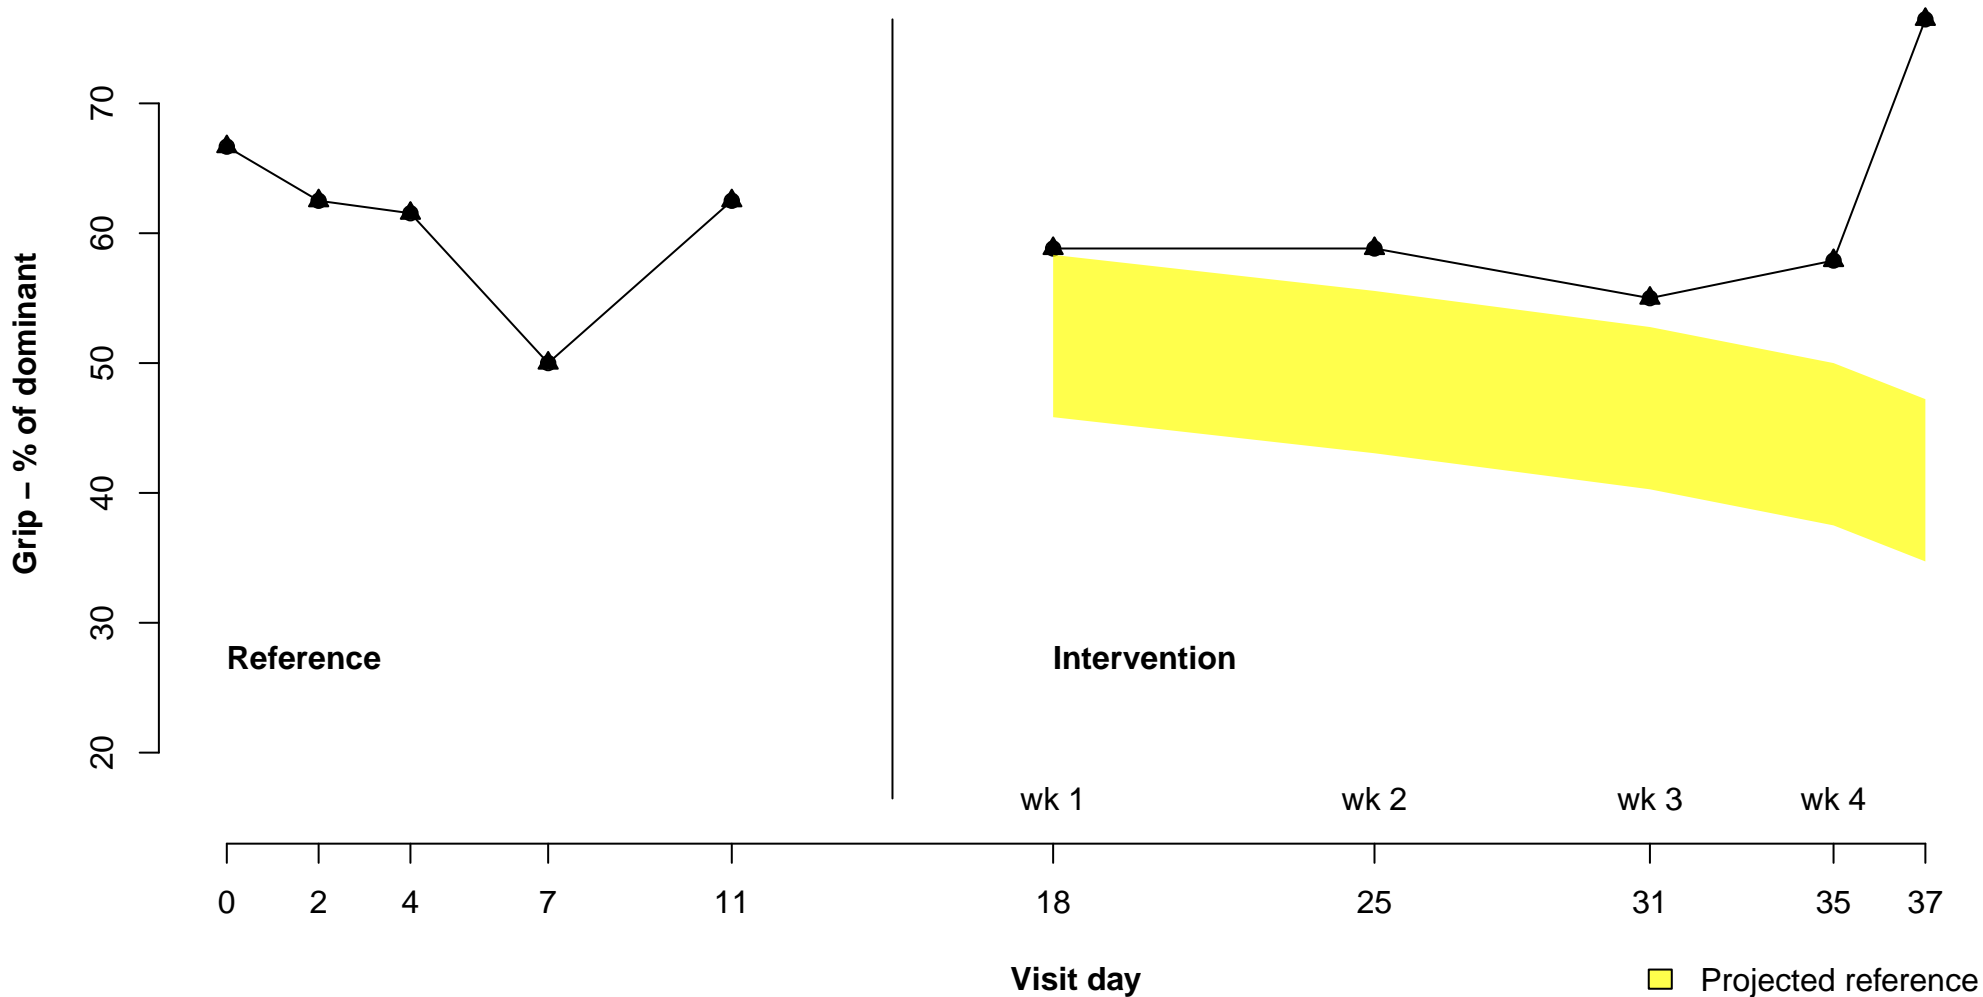

K  
Reference phase trend: minimal (-1 %/visit)  
Reference phase stability: highly variable (0% in envelope)  
Level change estimate: minimal  
Intervention phase -5 % lower than Reference phase  
Average of 5 % increase across Intervention visits  
30% overlap between phases (PAND)

## Non-Dominant Grip Strength

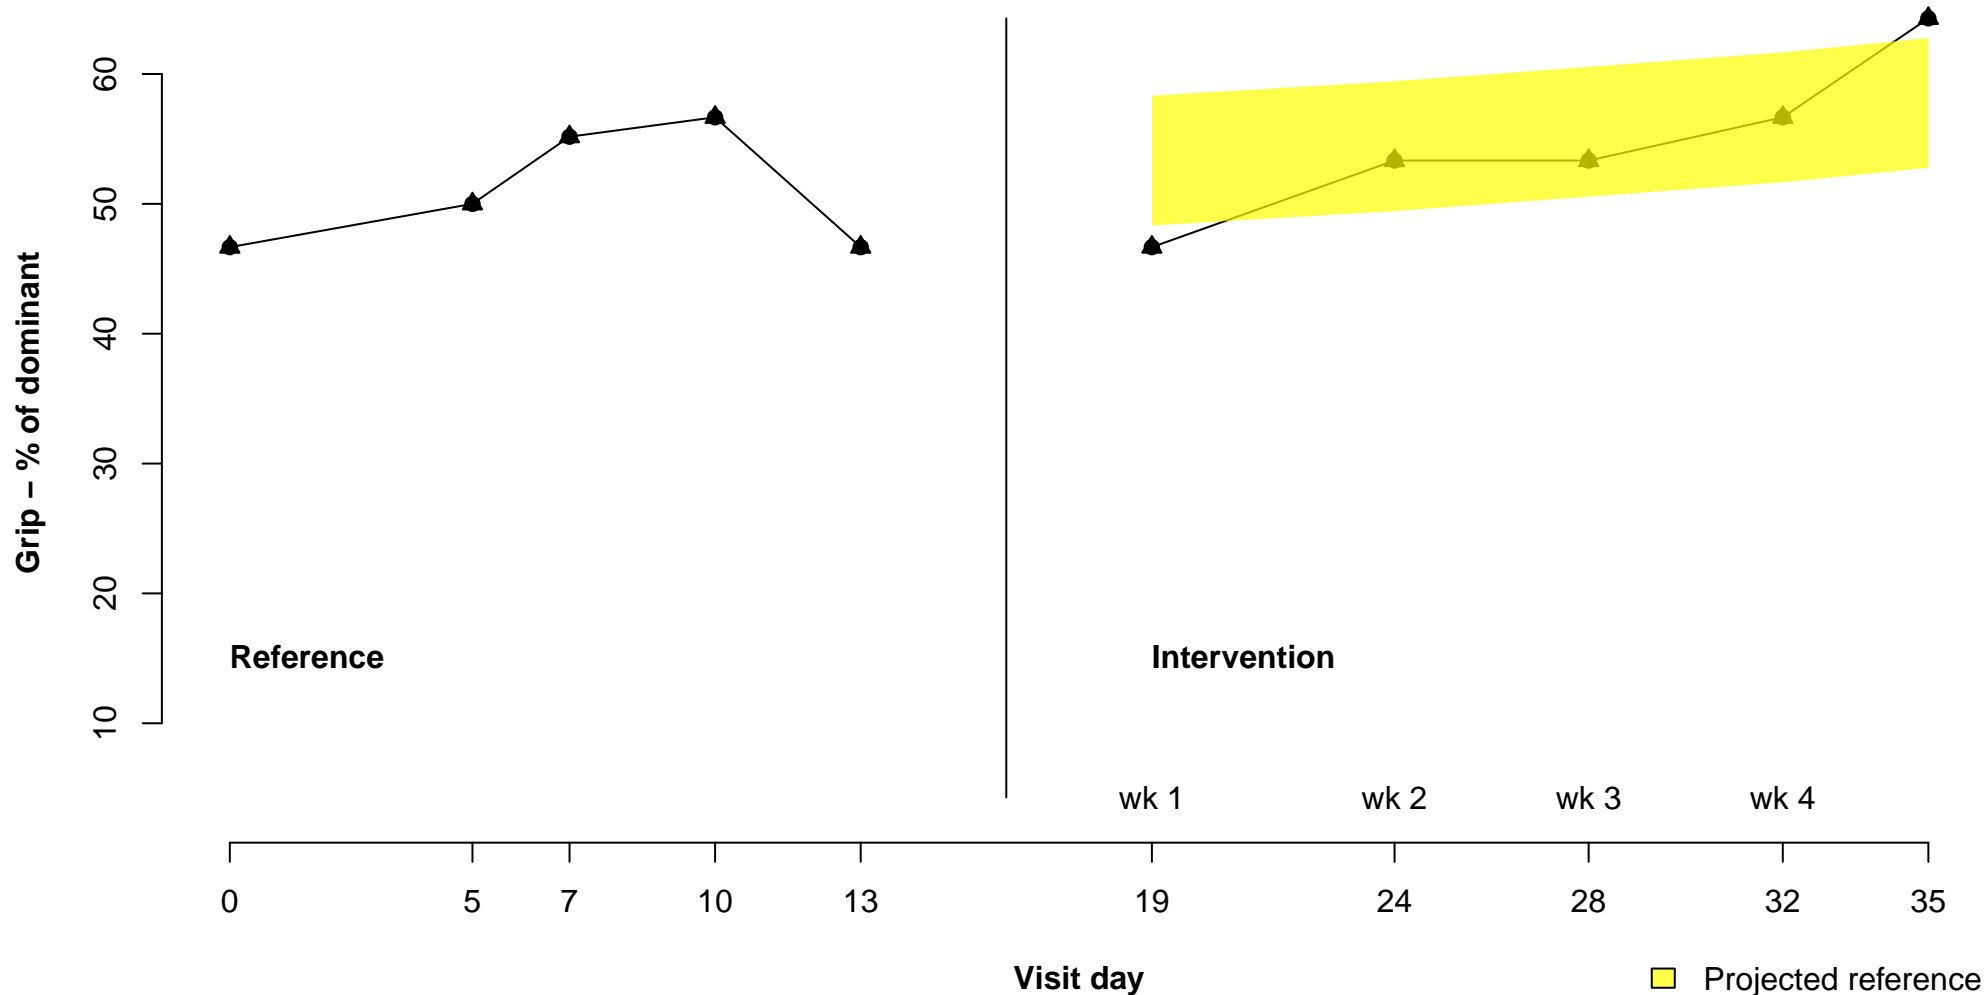

L  
 Reference phase trend: minimal (0 %/visit)  
 Reference phase stability: stable (100% in envelope)  
 Level change estimate: minimal  
 Intervention phase -5 % lower than Reference phase  
 Average of 4 % increase across Intervention visits  
 30% overlap between phases (PAND)

# Non-Dominant Grip Strength

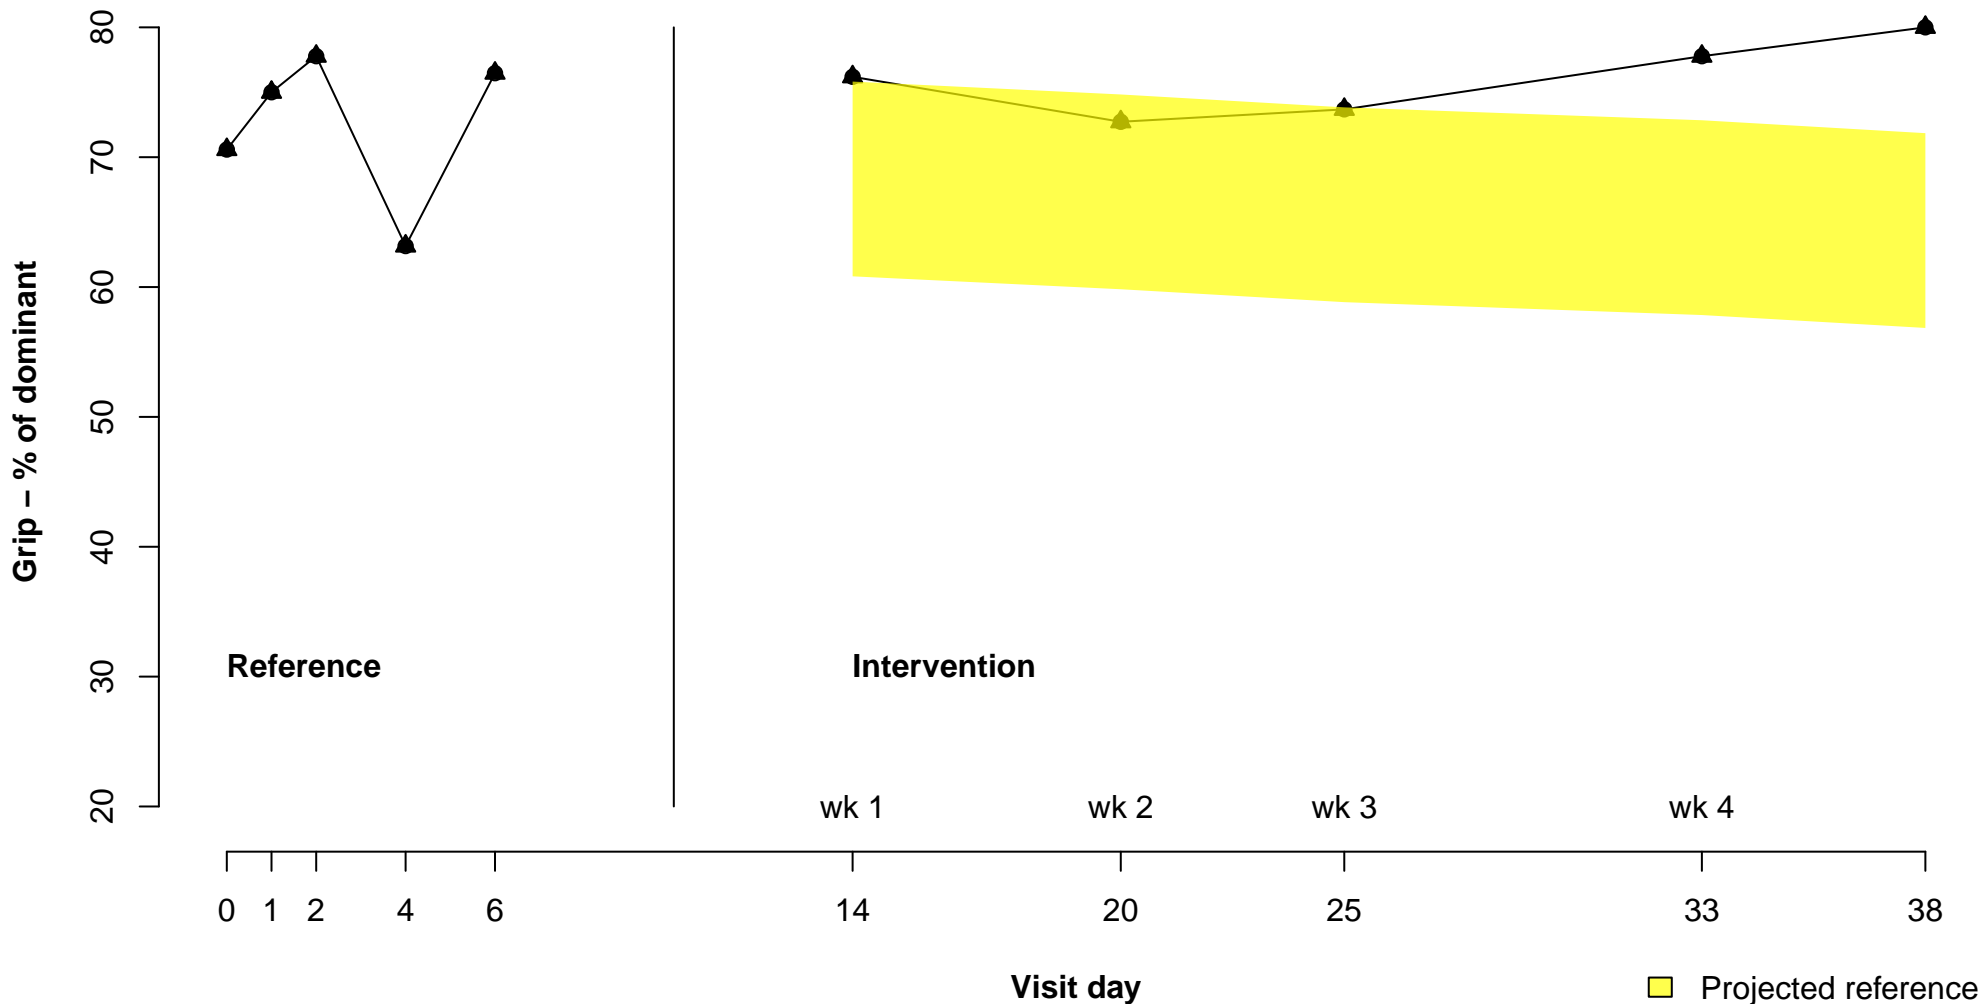

M

Reference phase trend: minimal (1 %/visit)

Reference phase stability: stable (80% in envelope)

Level change estimate: minimal

Intervention phase -3 % lower than Reference phase

Average of -1 % decrease across Intervention visits

40% overlap between phases (PAND)



# Non-Dominant Grip Strength

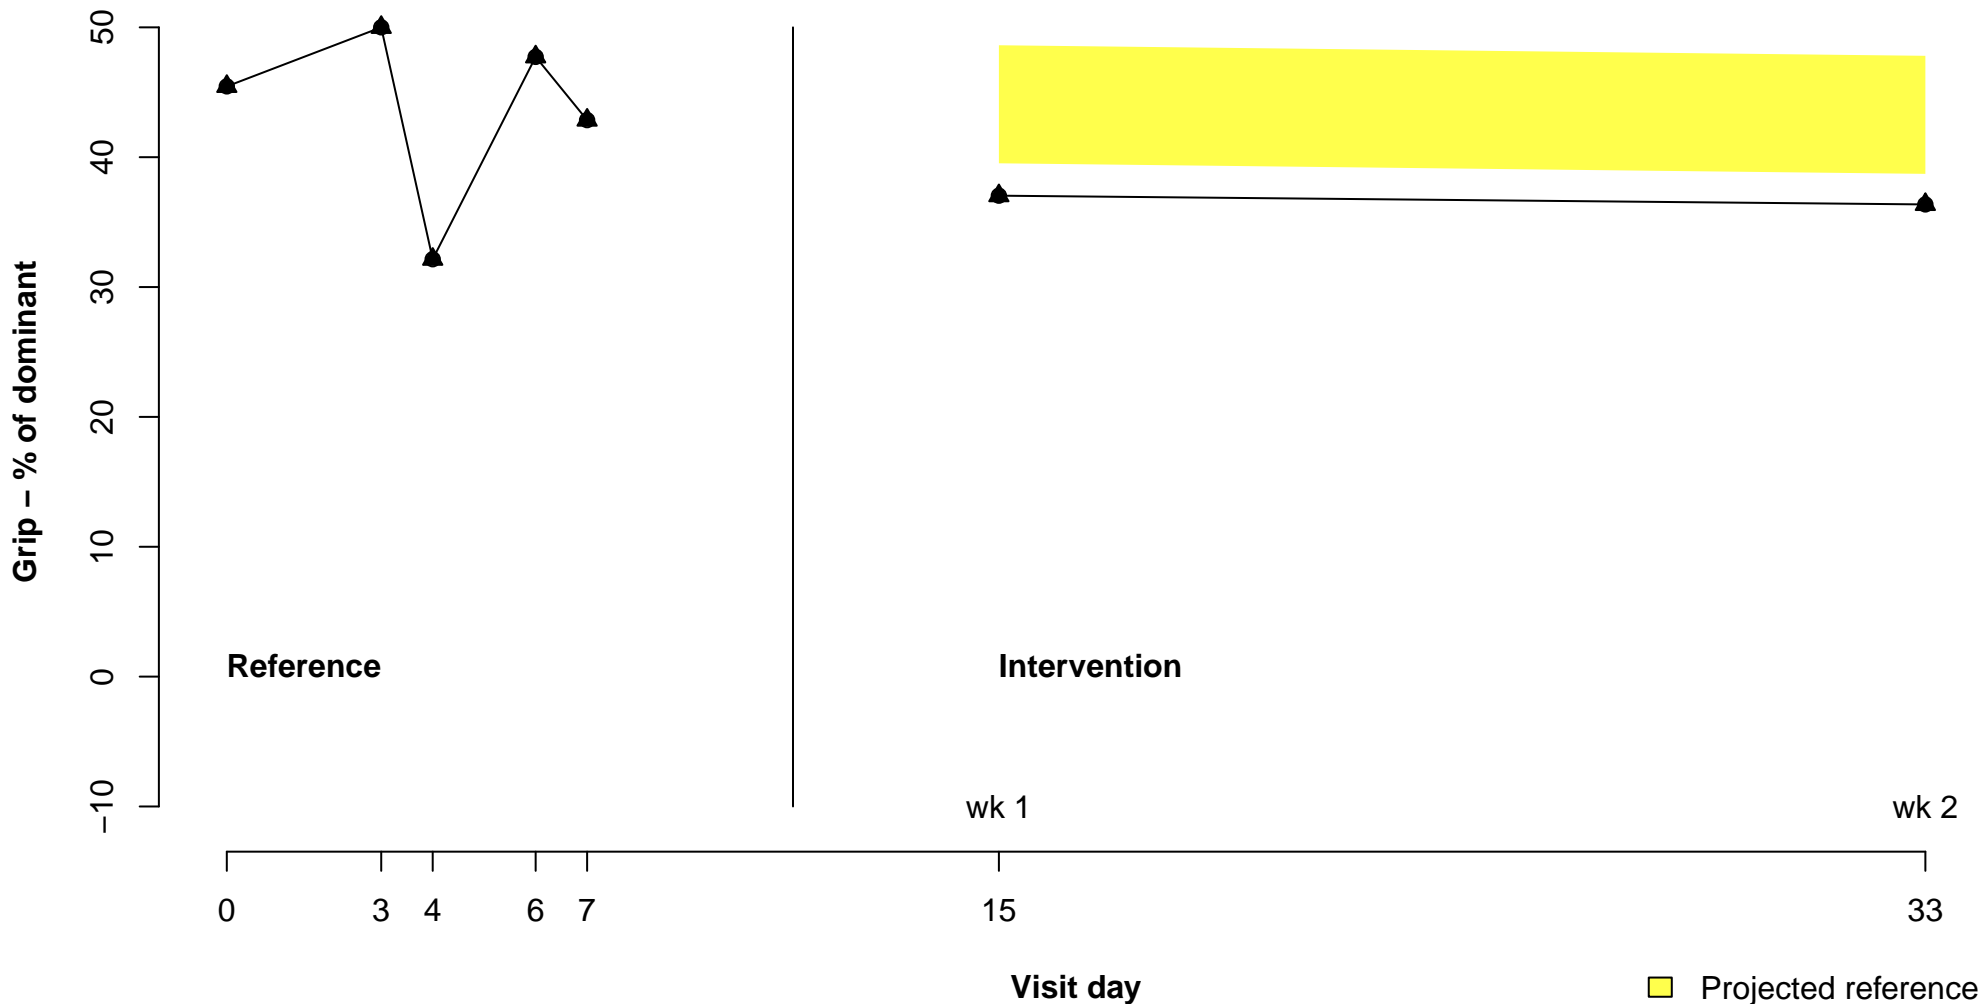

N  
Reference phase trend: minimal (-1 %/visit)  
Reference phase stability: stable (80% in envelope)  
Level change estimate: minimal  
Intervention phase -5 % lower than Reference phase  
Average of 0 % decrease across Intervention visits  
29% overlap between phases (PAND)

■ Projected reference

# Non-Dominant Grip Strength

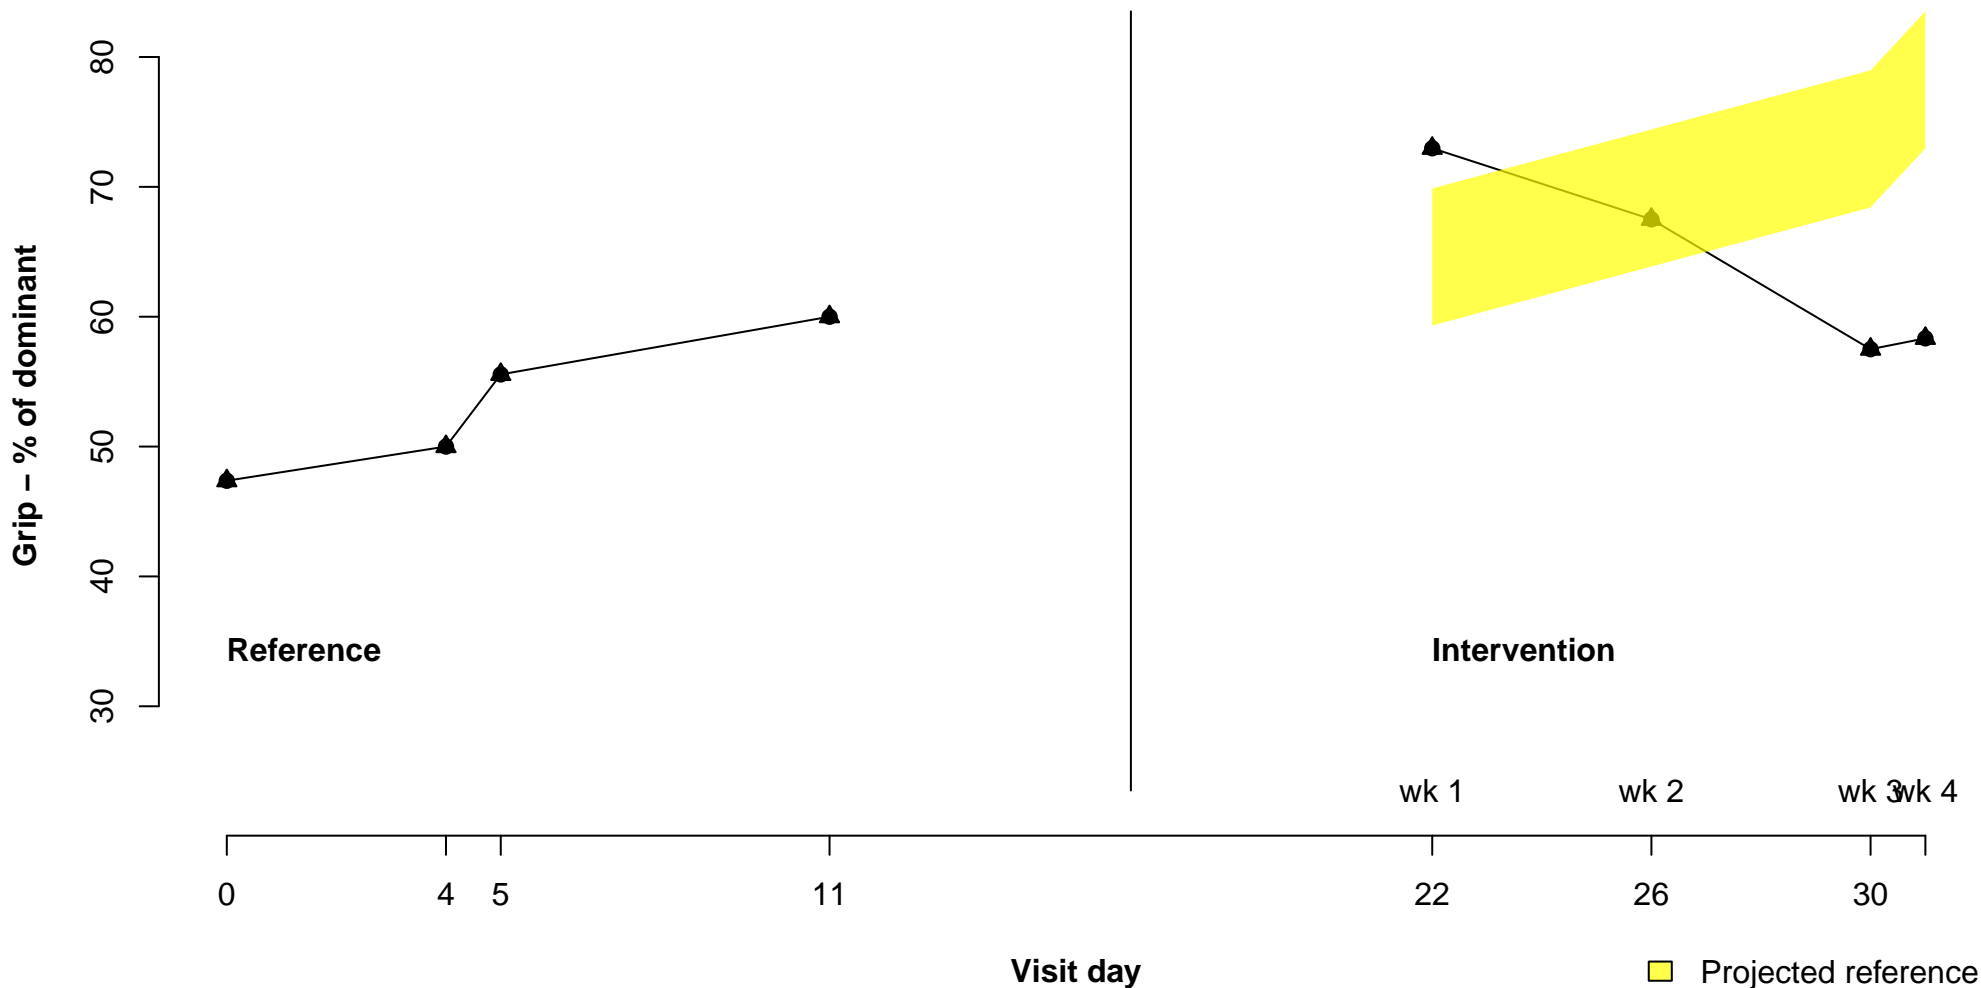

O

Reference phase trend: minimal (4 %/visit)

Reference phase stability: highly variable (50% in envelope)

Level change estimate: moderate

Intervention phase 8 % higher than Reference phase

Average of -9 % decrease across Intervention visits

38% overlap between phases (PAND)

## Non-Dominant Grip Strength

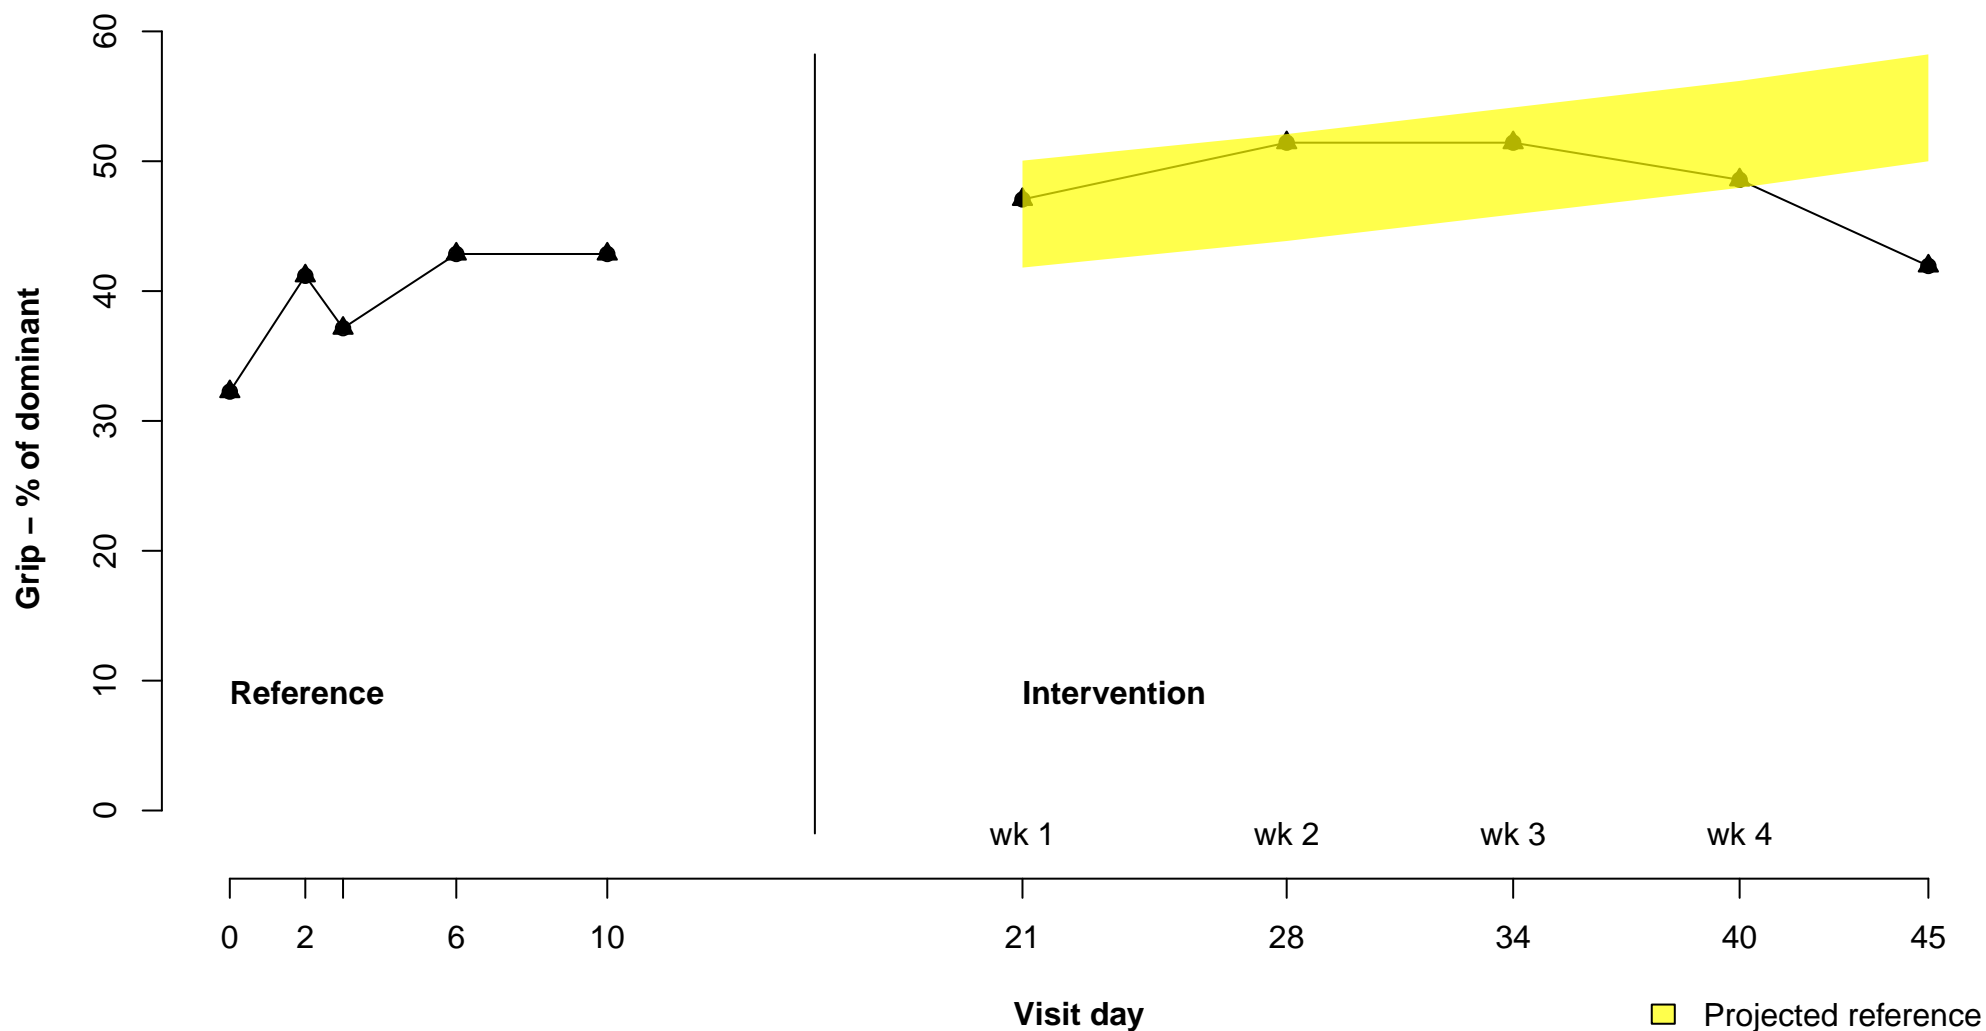

P  
Reference phase trend: minimal (3 %/visit)  
Reference phase stability: somewhat variable (60% in envelope)  
Level change estimate: minimal  
Intervention phase 3 % higher than Reference phase  
Average of -4 % decrease across Intervention visits  
40% overlap between phases (PAND)

# Non-Dominant Grip Strength

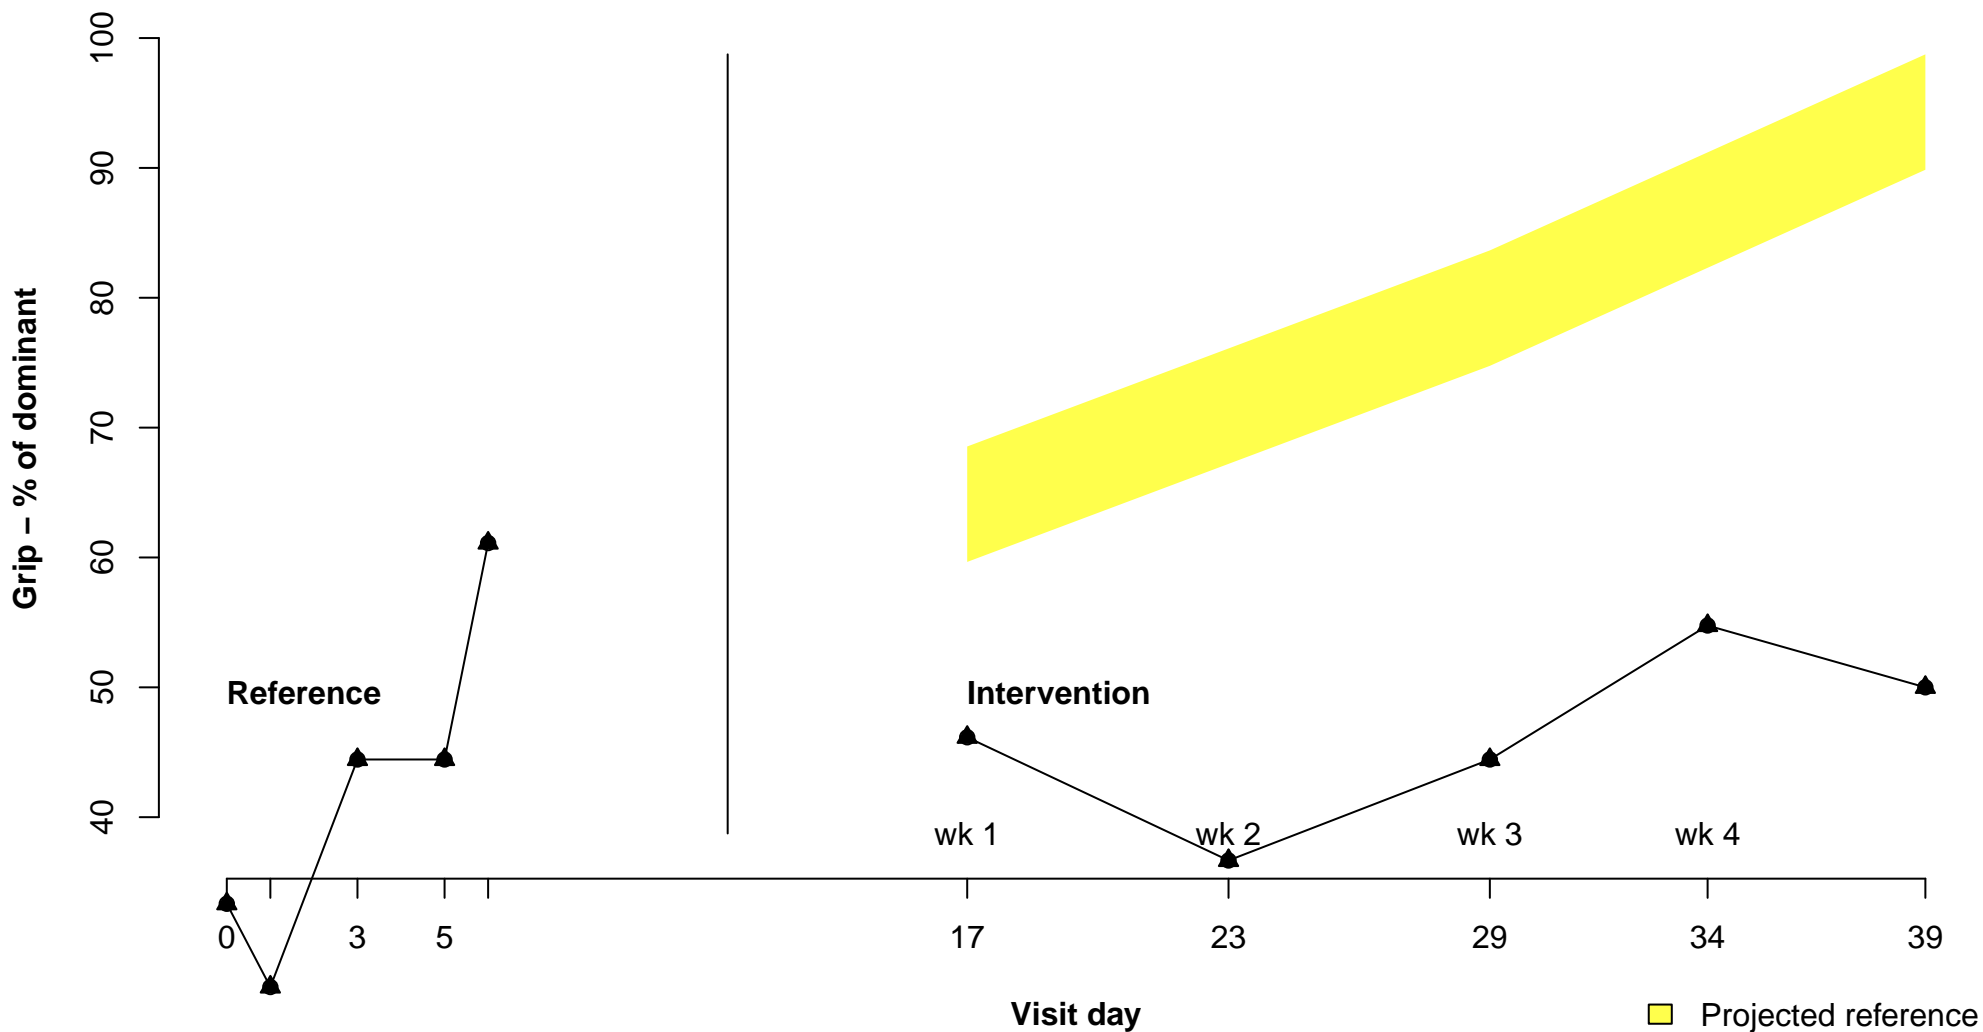

Q

- Reference phase trend: moderate (7 %/visit)
- Reference phase stability: highly variable (20% in envelope)
- Level change estimate: large
- Intervention phase -18 % lower than Reference phase
- Average of -6 % decrease across Intervention visits
- 50% overlap between phases (PAND)

## Non-Dominant Grip Strength

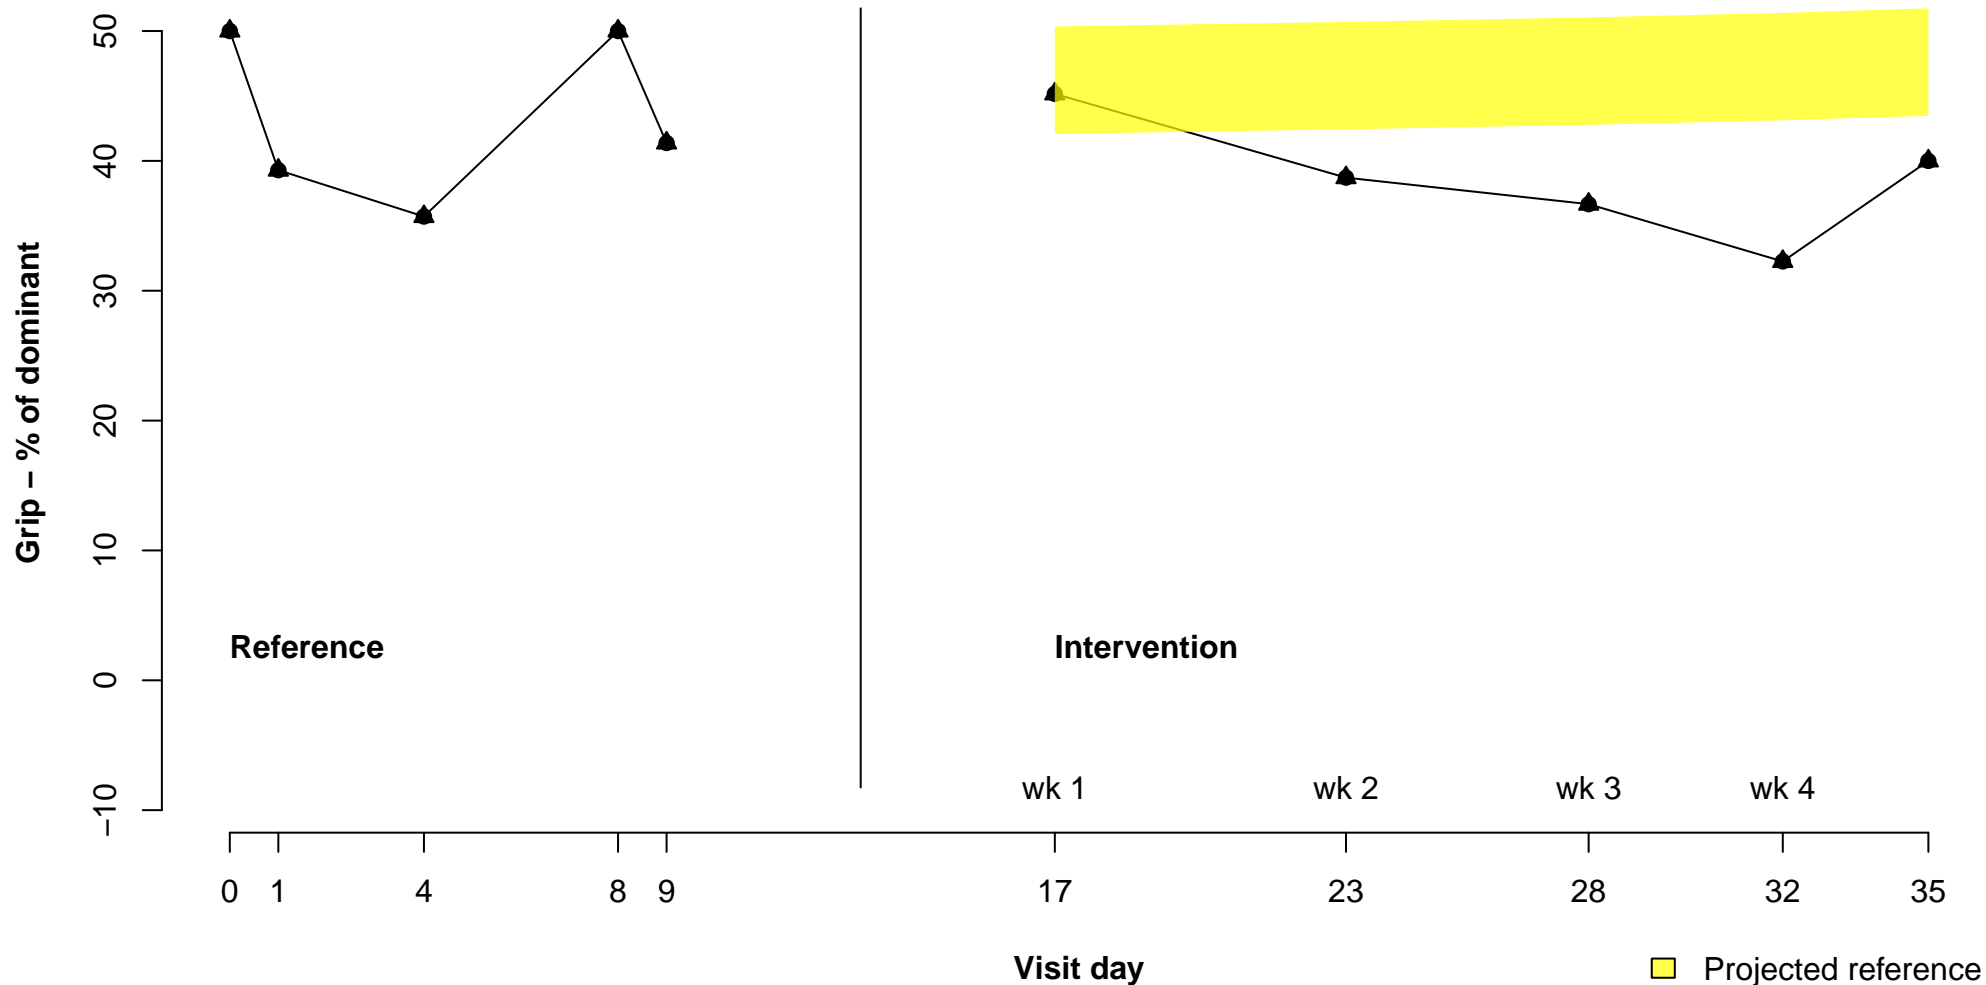

R

Reference phase trend: minimal (-2 %/visit)

Reference phase stability: stable (100% in envelope)

Level change estimate: minimal

Intervention phase 4 % higher than Reference phase

Average of 1 % increase across Intervention visits

20% overlap between phases (PAND)

## Non-Dominant Grip Strength

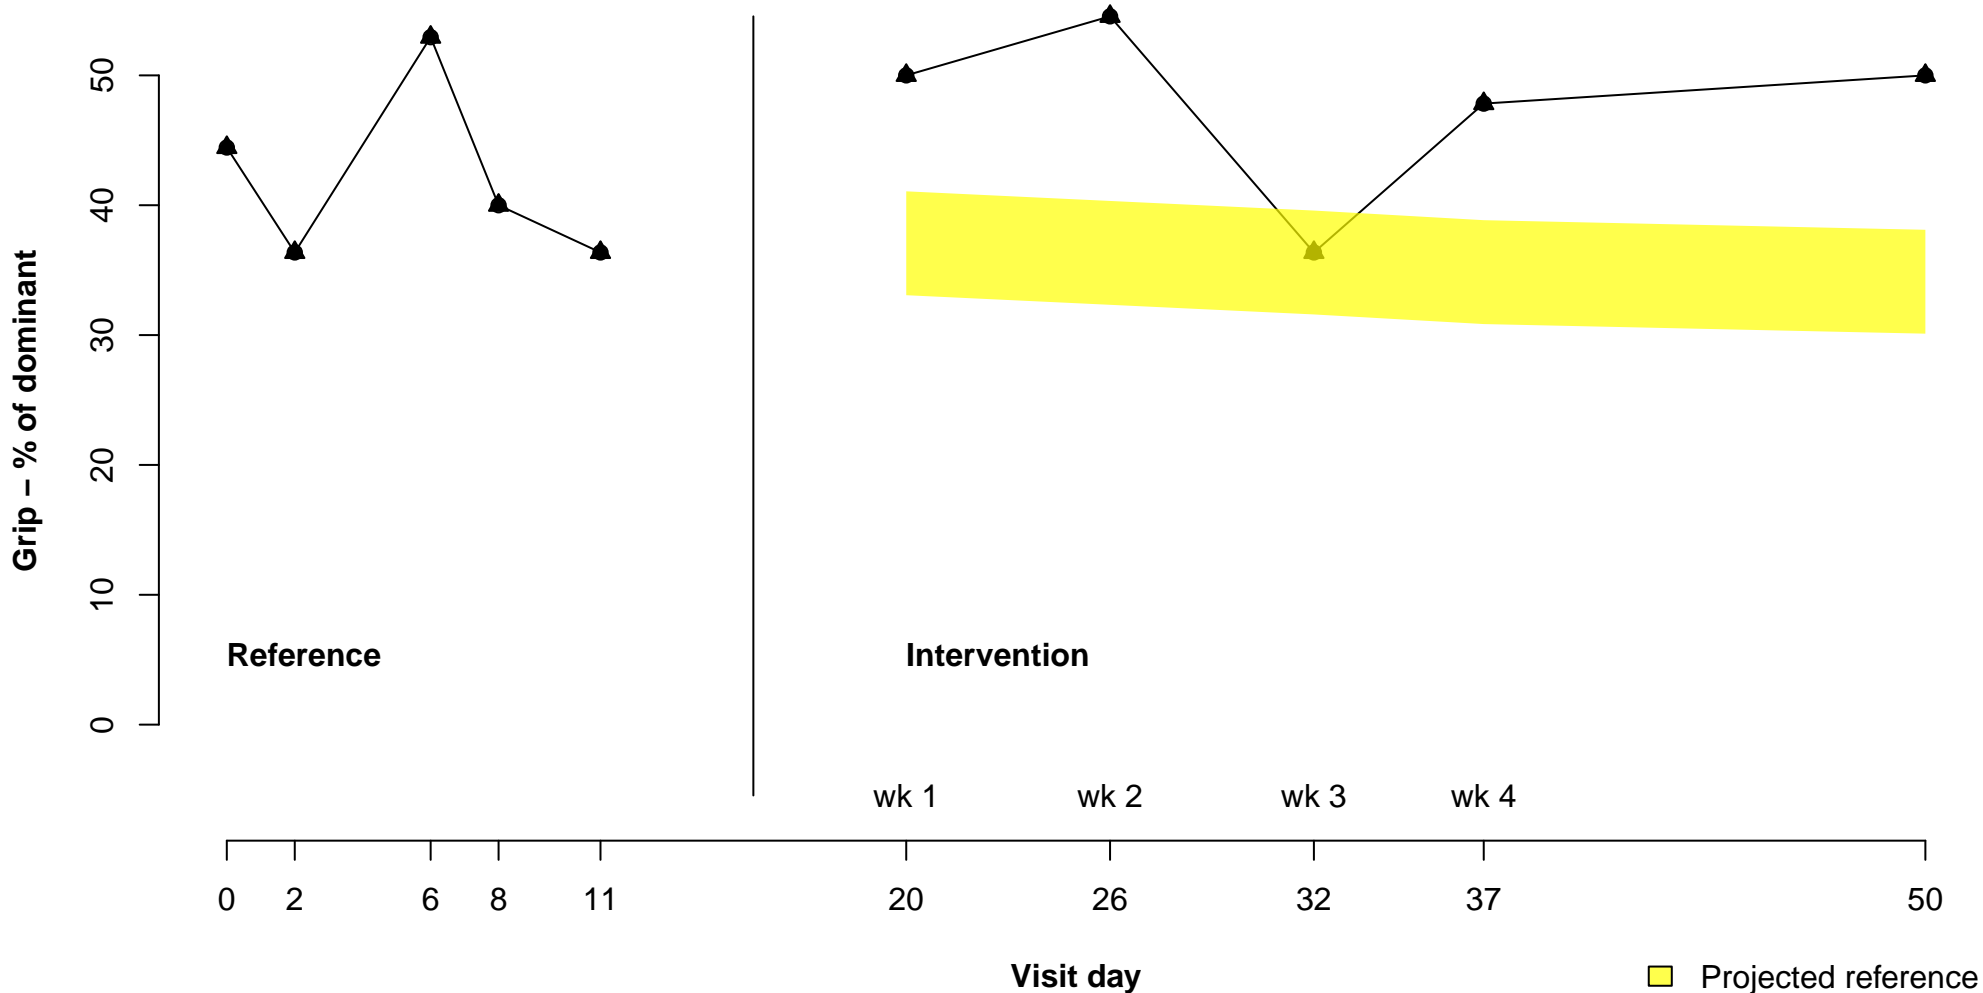

S

Reference phase trend: minimal (-2 %/visit)

Reference phase stability: stable (80% in envelope)

Level change estimate: moderate

Intervention phase 12 % higher than Reference phase

Average of 2 % increase across Intervention visits

10% overlap between phases (PAND)
