# Supplementary material for: A biofeedback-enhanced therapeutic exercise video game intervention for young people with cerebral palsy: A randomized single-case experimental design feasibility study
Source: PLOS journal article supplement (doi:10.1371/journal.pone.0234767), 2020-06-22
Supplement: S2 (10.1371/journal.pone.0234767.s002) [file journal.pone.0234767.s002]

# The Single-Case Reporting guideline In BEhavioural interventions (SCRIBE) 2016 Checklist

| Item number                    | Topic                       | Item description                                                                                                                                                                                                                                                                                          | Notes                 |
|--------------------------------|-----------------------------|-----------------------------------------------------------------------------------------------------------------------------------------------------------------------------------------------------------------------------------------------------------------------------------------------------------|-----------------------|
| <b>TITLE and ABSTRACT</b>      |                             |                                                                                                                                                                                                                                                                                                           |                       |
| 1                              | Title                       | Identify the research as a single-case experimental design in the title                                                                                                                                                                                                                                   | p1                    |
| 2                              | Abstract                    | Summarise the research question, population, design, methods including intervention/s (independent variable/s) and target behaviour/s and any other outcome/s (dependent variable/s), results, and conclusions                                                                                            | p1-2                  |
| <b>INTRODUCTION</b>            |                             |                                                                                                                                                                                                                                                                                                           |                       |
| 3                              | Scientific background       | Describe the scientific background to identify issue/s under analysis, current scientific knowledge, and gaps in that knowledge base                                                                                                                                                                      | p3-4                  |
| 4                              | Aims                        | State the purpose/aims of the study, research question/s, and, if applicable, hypotheses                                                                                                                                                                                                                  | p4-5                  |
| <b>METHODS</b>                 |                             |                                                                                                                                                                                                                                                                                                           |                       |
| <b>DESIGN</b>                  |                             |                                                                                                                                                                                                                                                                                                           |                       |
| 5                              | Design                      | Identify the design (e.g., withdrawal/reversal, multiple-baseline, alternating-treatments, changing-criterion, some combination thereof, or adaptive design) and describe the phases and phase sequence (whether determined <i>a priori</i> or data-driven) and, if applicable, criteria for phase change | p5-6                  |
| 6                              | Procedural changes          | Describe any procedural changes that occurred during the course of the investigation after the start of the study                                                                                                                                                                                         | p6                    |
| 7                              | Replication                 | Describe any planned replication                                                                                                                                                                                                                                                                          | N/A                   |
| 8                              | Randomisation               | State whether randomisation was used, and if so, describe the randomisation method and the elements of the study that were randomized                                                                                                                                                                     | p8                    |
| 9                              | Blinding                    | State whether blinding/masking was used, and if so, describe who was blinded/masked                                                                                                                                                                                                                       | p6                    |
| <b>PARTICIPANT/S or UNIT/S</b> |                             |                                                                                                                                                                                                                                                                                                           |                       |
| 10                             | Selection criteria          | State the inclusion and exclusion criteria, if applicable, and the method of recruitment                                                                                                                                                                                                                  | p6-7                  |
| 11                             | Participant characteristics | For each participant, describe the demographic characteristics and clinical (or other) features relevant to the research question, such that anonymity is ensured                                                                                                                                         | p15                   |
| <b>CONTEXT</b>                 |                             |                                                                                                                                                                                                                                                                                                           |                       |
| 12                             | Setting                     | Describe characteristics of the setting and location where the study was conducted                                                                                                                                                                                                                        | p6                    |
| <b>APPROVALS</b>               |                             |                                                                                                                                                                                                                                                                                                           |                       |
| 13                             | Ethics                      | State whether ethics approval was obtained and indicate if and how informed consent and/or assent were obtained                                                                                                                                                                                           | p6                    |
| <b>MEASURES and MATERIALS</b>  |                             |                                                                                                                                                                                                                                                                                                           |                       |
| 14                             | Measures                    | Operationally define all target behaviours and outcome measures, describe reliability and validity, state how they were selected, and how and when they were measured                                                                                                                                     | p10-12                |
| 15                             | Equipment                   | Clearly describe any equipment and/or materials (e.g., technological aids, biofeedback, computer programs, intervention manuals or other material resources) used to measure target behaviour/s and other outcome/s or deliver the interventions                                                          | p8-9                  |
| <b>INTERVENTIONS</b>           |                             |                                                                                                                                                                                                                                                                                                           |                       |
| 16                             | Intervention                | Describe intervention and control condition in each phase, including how and when they were actually administered, with as much detail as possible to facilitate attempts at replication                                                                                                                  | p8-9                  |
| 17                             | Procedural fidelity         | Describe how procedural fidelity was evaluated in each phase                                                                                                                                                                                                                                              | p6,8                  |
| <b>ANALYSIS</b>                |                             |                                                                                                                                                                                                                                                                                                           |                       |
| 18                             | Analyses                    | Describe and justify all methods used to analyse data                                                                                                                                                                                                                                                     | p8                    |
| <b>RESULTS</b>                 |                             |                                                                                                                                                                                                                                                                                                           |                       |
| 19                             | Sequence completed          | For each participant, report the sequence actually completed, including the number of trials for each session for each case. For participant/s who did not complete, state when they stopped and the reasons                                                                                              | p14,17                |
| 20                             | Outcomes and estimation     | For each participant, report results, including raw data, for each target behaviour and other outcome/s                                                                                                                                                                                                   | p14,17                |
| 21                             | Adverse events              | State whether or not any adverse events occurred for any participant and the phase in which they occurred                                                                                                                                                                                                 | p14                   |
| <b>DISCUSSION</b>              |                             |                                                                                                                                                                                                                                                                                                           |                       |
| 22                             | Interpretation              | Summarise findings and interpret the results in the context of current evidence                                                                                                                                                                                                                           | p19                   |
| 23                             | Limitations                 | Discuss limitations, addressing sources of potential bias and imprecision                                                                                                                                                                                                                                 | p22-23                |
| 24                             | Applicability               | Discuss applicability and implications of the study findings                                                                                                                                                                                                                                              | p19-22                |
| <b>DOCUMENTATION</b>           |                             |                                                                                                                                                                                                                                                                                                           |                       |
| 25                             | Protocol                    | If available, state where a study protocol can be accessed                                                                                                                                                                                                                                                | p2                    |
| 26                             | Funding                     | Identify source/s of funding and other support; describe the role of funders                                                                                                                                                                                                                              | positioned by journal |
